# Supplementary material for: Drug repurposing candidates to treat core symptoms in autism spectrum disorder
Source: Front Pharmacol. 2022 Sep 12;13:995439. doi: 10.3389/fphar.2022.995439 (PMC9510394; doi:10.3389/fphar.2022.995439)
Supplement: Supplementary file 2 [file Table3.xlsx]

## Sheet: 323 genes in ASD network
Category	ID	Name	Source	p-value	q-value Bonferroni	q-value FDR B&H	q-value FDR B&Y	Hit Count in Query List	Hit Count in Genome	Hit in Query List
GO: Molecular Function	GO:0019904	protein domain specific binding		3.822E-12	2.855E-9	2.855E-9	2.054E-8	46	895	DLGAP2,DLGAP1,MAPT,ZMYND8,SSTR2,PTEN,FOXA1,SYNGAP1,FZD1,FZD7,DLGAP3,STXBP1,LDB1,WNT3A,SCN2A,KCNN2,ADGRL2,TBL1X,SHANK1,MPP3,WHRN,DPYSL3,TCF7L2,AKAP5,CALM2,CALM3,WNT3,WNT5A,DLGAP4,APBA1,GRIA2,GRIA3,POU3F2,CHD8,GRIK5,NLGN1,SKI,CREBBP,SHANK3,SHANK2,LPA,PAX3,TRAK2,CTNNB1,OLIG2,SNTA1
GO: Molecular Function	GO:0035254	glutamate receptor binding		8.656E-11	6.466E-8	3.233E-8	2.326E-7	13	70	MAP1A,PTEN,SHANK1,DRD2,AKAP5,CALM2,CALM3,GRIA2,GRIN2B,SHANK3,SHANK2,GRIP2,CTNNB1
GO: Molecular Function	GO:0003682	chromatin binding		7.263E-10	5.426E-7	1.809E-7	1.301E-6	37	725	HDAC4,TSPYL2,ASH1L,KDM6B,FOXA1,PHF21A,NPM3,WAC,BAP1,ARID1B,LDB1,SATB1,SLC30A9,TBL1X,DNMT3A,TCF4,TCF7L2,KDM5A,DPPA2,NSD1,CHD8,SIN3A,SKI,ADNP,RFX4,CREBBP,NCOA5,KMT5B,ASXL3,NCOA1,SMARCC2,FOXP1,ASXL2,PAX3,CTNNB1,MBD5,POLQ
GO: Molecular Function	GO:0003712	transcription coregulator activity		1.501E-9	1.121E-6	2.802E-7	2.016E-6	31	545	MYT1L,KDM5B,HDAC4,IRF2BP1,ZMYND8,BCL11A,PHF2,KMT2C,ARID1B,LDB1,WNT3A,IRF2BPL,SLC30A9,TBL1X,DNMT3A,TCF4,TCF20,KDM5A,PHF12,DYRK1A,NSD1,SIN3A,MED13L,SKI,TBL1XR1,CREBBP,NCOA5,PDLIM1,NCOA1,SMARCC2,CTNNB1
GO: Molecular Function	GO:0030165	PDZ domain binding		1.038E-7	7.752E-5	1.550E-5	1.115E-4	13	123	SSTR2,PTEN,FZD1,FZD7,DLGAP3,ADGRL2,MPP3,APBA1,GRIA2,GRIA3,GRIK5,NLGN1,SNTA1
GO: Molecular Function	GO:0035255	ionotropic glutamate receptor binding		1.733E-7	1.295E-4	2.158E-5	1.552E-4	8	39	MAP1A,PTEN,SHANK1,DRD2,GRIN2B,SHANK3,SHANK2,CTNNB1
GO: Molecular Function	GO:0019900	kinase binding		2.621E-7	1.958E-4	2.797E-5	2.012E-4	40	1027	HDAC4,MAPT,KIZ,BCL11A,PTEN,LYST,GFAP,ADD2,SYNGAP1,CAMK2N1,STXBP1,ANGPT4,KCNQ3,PPP1R9B,TAOK1,FGF13,TESC,SPAG16,TSACC,VLDLR,DPYSL2,TCF7L2,AKAP5,ANGPT1,ANGPT2,ANK2,DSCAM,CALM2,CALM3,BAG5,GRIA2,CNKSR2,CAV2,SKI,CCKBR,WDR45,CADPS,LPA,CTNNB1,TBR1
GO: Molecular Function	GO:0003714	transcription corepressor activity		3.972E-7	2.967E-4	3.598E-5	2.589E-4	16	212	KDM5B,HDAC4,IRF2BP1,ZMYND8,BCL11A,IRF2BPL,TBL1X,DNMT3A,TCF4,PHF12,NSD1,SIN3A,SKI,TBL1XR1,CREBBP,NCOA5
GO: Molecular Function	GO:0005261	cation channel activity		4.698E-7	3.510E-4	3.598E-5	2.589E-4	23	423	KCNMB2,KCNQ5,SCN1A,SCN2A,SCN4B,KCNMA1,KCNMB1,KCNN2,KCNQ2,KCNQ3,CACNA1H,FGF13,CACNA1E,ANK2,CALM2,CALM3,GRIA2,GRIA3,GRIK5,GRIN2B,KCNQ4,SNTA1,CACNA2D3
GO: Molecular Function	GO:0022836	gated channel activity		4.817E-7	3.598E-4	3.598E-5	2.589E-4	21	360	GABRB2,GABRB3,KCNMB2,KCNQ5,SCN1A,SCN2A,SCN4B,KCNMA1,KCNMB1,KCNN2,KCNQ2,KCNQ3,CACNA1H,CACNA1E,GRIA2,GRIA3,GRIK5,GRIN2B,KCNQ4,CACNA2D3,GABRA6
GO: Molecular Function	GO:0005216	ion channel activity		6.199E-7	4.630E-4	4.210E-5	3.028E-4	26	531	GABRB2,GABRB3,KCNMB2,KCNQ5,SCN1A,SCN2A,SCN4B,KCNMA1,KCNMB1,KCNN2,KCNQ2,KCNQ3,CACNA1H,FGF13,CACNA1E,ANK2,CALM2,CALM3,GRIA2,GRIA3,GRIK5,GRIN2B,KCNQ4,SNTA1,CACNA2D3,GABRA6
GO: Molecular Function	GO:0005102	signaling receptor binding		7.735E-7	5.778E-4	4.578E-5	3.293E-4	60	1945	MAP1A,MARK1,IL36A,SYTL2,PAGR1,PTEN,TRIP12,GFAP,BLK,FZD1,WNT5B,FZD7,S100B,NRXN1,ANGPT4,UCN,WNT3A,PPP1R9B,FGF13,GNAI1,SLC30A9,SHANK1,DRD2,TCF7L2,AKAP5,ANGPT1,ANGPT2,DSCAM,FOXP2,CALM2,CALM3,WNT3,WNT5A,NXPH1,ARFGEF2,NSD1,GRIA2,LRRC4B,NLGN1,GRIN2B,CAV2,CREBBP,ANGPTL1,SHANK3,CRH,CCKBR,LHB,SHANK2,SYTL3,ASXL3,LPA,NCOA1,FOXP1,UCN3,ASXL2,GRIP2,TRAK2,CTNNB1,SYTL1,NXPH3
GO: Molecular Function	GO:0003690	double-stranded DNA binding		7.967E-7	5.951E-4	4.578E-5	3.293E-4	58	1855	MYT1L,SOX11,KDM5B,ELOA2,HDAC4,VEZF1,MAPT,TSPYL2,IRF6,CHD2,POGZ,BCL11A,FOXN3,NR6A1,KDM6B,FOXA1,HNF4G,ARNTL2,SOX7,SATB1,SPDEF,NR3C2,NKX2-2,MMP12,AIM2,TBL1X,DNMT3A,TCF4,XRN2,TCF7L2,PCBP3,DEAF1,TCF20,FOXP2,KDM5A,NACC1,NSD1,POU3F2,POU3F4,SKI,ADNP,CREB3L4,RFX3,TBL1XR1,RFX4,CREBBP,FOXP4,ZNF517,NKX2-4,ASCL2,MKX,NCOA1,FOXP1,RORB,PAX3,PAX5,TBR1,OLIG2
GO: Molecular Function	GO:0001786	phosphatidylserine binding		8.682E-7	6.486E-4	4.633E-5	3.333E-4	9	64	MARK1,SYTL2,SYT9,SYT4,SYT5,SMPD3,SYT13,SYT2,SYT7
GO: Molecular Function	GO:0019901	protein kinase binding		1.060E-6	7.919E-4	5.279E-5	3.798E-4	36	923	HDAC4,MAPT,KIZ,BCL11A,PTEN,LYST,ADD2,SYNGAP1,CAMK2N1,STXBP1,ANGPT4,KCNQ3,TAOK1,FGF13,TESC,SPAG16,TSACC,VLDLR,DPYSL2,TCF7L2,AKAP5,ANGPT1,ANGPT2,ANK2,DSCAM,CALM2,CALM3,BAG5,GRIA2,CNKSR2,CAV2,SKI,WDR45,CADPS,CTNNB1,TBR1
GO: Molecular Function	GO:0015267	channel activity		1.282E-6	9.578E-4	5.813E-5	4.182E-4	28	624	GABRB2,GABRB3,KCNMB2,KCNQ5,NRXN1,SCN1A,SCN2A,SCN4B,KCNMA1,KCNMB1,KCNN2,KCNQ2,KCNQ3,CACNA1H,FGF13,CACNA1E,ANK2,CALM2,CALM3,GRIA2,GRIA3,GRIK5,GRIN2B,NUP155,KCNQ4,SNTA1,CACNA2D3,GABRA6
GO: Molecular Function	GO:0022803	passive transmembrane transporter activity		1.323E-6	9.882E-4	5.813E-5	4.182E-4	28	625	GABRB2,GABRB3,KCNMB2,KCNQ5,NRXN1,SCN1A,SCN2A,SCN4B,KCNMA1,KCNMB1,KCNN2,KCNQ2,KCNQ3,CACNA1H,FGF13,CACNA1E,ANK2,CALM2,CALM3,GRIA2,GRIA3,GRIK5,GRIN2B,NUP155,KCNQ4,SNTA1,CACNA2D3,GABRA6
GO: Molecular Function	GO:1990837	sequence-specific double-stranded DNA binding		1.540E-6	1.151E-3	6.392E-5	4.598E-4	55	1756	MYT1L,SOX11,KDM5B,HDAC4,VEZF1,TSPYL2,IRF6,CHD2,POGZ,BCL11A,FOXN3,NR6A1,KDM6B,FOXA1,HNF4G,ARNTL2,SOX7,SATB1,SPDEF,NR3C2,NKX2-2,MMP12,TBL1X,DNMT3A,TCF4,XRN2,TCF7L2,PCBP3,DEAF1,TCF20,FOXP2,KDM5A,NACC1,NSD1,POU3F2,POU3F4,SKI,ADNP,CREB3L4,RFX3,TBL1XR1,RFX4,CREBBP,FOXP4,ZNF517,NKX2-4,ASCL2,MKX,NCOA1,FOXP1,RORB,PAX3,PAX5,TBR1,OLIG2
GO: Molecular Function	GO:0043565	sequence-specific DNA binding		1.751E-6	1.308E-3	6.883E-5	4.952E-4	57	1855	MYT1L,SOX11,KDM5B,HDAC4,VEZF1,MAPT,TSPYL2,IRF6,CHD2,POGZ,BCL11A,FOXN3,NR6A1,KDM6B,FOXA1,HNF4G,ARNTL2,SOX7,SATB1,SPDEF,NR3C2,NKX2-2,MMP12,TBL1X,DNMT3A,TCF4,XRN2,TCF7L2,PCBP3,DEAF1,TCF20,FOXP2,KDM5A,NACC1,NSD1,POU3F2,POU3F4,SKI,ADNP,CREB3L4,RFX3,TBL1XR1,RFX4,CREBBP,FOXP4,ZNF517,NKX2-4,ASCL2,MKX,GATAD1,NCOA1,FOXP1,RORB,PAX3,PAX5,TBR1,OLIG2
GO: Molecular Function	GO:0008092	cytoskeletal protein binding		2.083E-6	1.556E-3	7.688E-5	5.530E-4	40	1115	SPAST,MAP1A,MAP6,MAPT,MARK1,MARK3,TULP1,ADD2,S100B,EFHC1,ABITRAM,KCNMA1,KCNN2,KCNQ2,PPP1R9B,TAOK1,FGF13,KLC1,FKBP15,DPYSL2,DPYSL3,AKAP5,ANK2,ANK3,GAS2L3,CALM2,CALM3,DYRK1A,ARFGEF2,GRIA2,ADNP,CCDC61,SHANK3,CORO1A,PPP5C,PDLIM1,TRAK2,TNNI2,SNTA1,MYO16
GO: Molecular Function	GO:0001664	G protein-coupled receptor binding		2.161E-6	1.614E-3	7.688E-5	5.530E-4	19	331	MARK1,FZD1,WNT5B,FZD7,UCN,WNT3A,PPP1R9B,GNAI1,SHANK1,AKAP5,CALM2,CALM3,WNT3,WNT5A,GRIN2B,CAV2,CRH,CCKBR,UCN3
GO: Molecular Function	GO:0000976	transcription cis-regulatory region binding		3.305E-6	2.469E-3	1.122E-4	8.073E-4	53	1709	MYT1L,SOX11,HDAC4,VEZF1,IRF6,CHD2,POGZ,BCL11A,FOXN3,NR6A1,KDM6B,FOXA1,HNF4G,ARNTL2,SOX7,SATB1,SPDEF,NR3C2,NKX2-2,MMP12,TBL1X,DNMT3A,TCF4,XRN2,TCF7L2,PCBP3,DEAF1,TCF20,FOXP2,KDM5A,NACC1,NSD1,POU3F2,POU3F4,SKI,ADNP,CREB3L4,RFX3,TBL1XR1,RFX4,CREBBP,FOXP4,ZNF517,NKX2-4,ASCL2,MKX,NCOA1,FOXP1,RORB,PAX3,PAX5,TBR1,OLIG2
GO: Molecular Function	GO:0001067	transcription regulatory region nucleic acid binding		3.599E-6	2.689E-3	1.169E-4	8.409E-4	53	1714	MYT1L,SOX11,HDAC4,VEZF1,IRF6,CHD2,POGZ,BCL11A,FOXN3,NR6A1,KDM6B,FOXA1,HNF4G,ARNTL2,SOX7,SATB1,SPDEF,NR3C2,NKX2-2,MMP12,TBL1X,DNMT3A,TCF4,XRN2,TCF7L2,PCBP3,DEAF1,TCF20,FOXP2,KDM5A,NACC1,NSD1,POU3F2,POU3F4,SKI,ADNP,CREB3L4,RFX3,TBL1XR1,RFX4,CREBBP,FOXP4,ZNF517,NKX2-4,ASCL2,MKX,NCOA1,FOXP1,RORB,PAX3,PAX5,TBR1,OLIG2
GO: Molecular Function	GO:1902936	phosphatidylinositol bisphosphate binding		4.123E-6	3.080E-3	1.283E-4	9.233E-4	11	120	MAPT,MARK1,SYTL2,SYT9,TULP1,FZD7,SYT5,APBA1,SYT7,WDR45,CADPS
GO: Molecular Function	GO:0046873	metal ion transmembrane transporter activity		6.884E-6	5.142E-3	2.057E-4	1.480E-3	24	532	KCNMB2,KCNQ5,SCN1A,SCN2A,SCN4B,KCNMA1,KCNMB1,KCNN2,KCNQ2,KCNQ3,CACNA1H,FGF13,SLC30A9,CACNA1E,ANK2,CALM2,CALM3,GRIA2,GRIK5,GRIN2B,SLC6A1,KCNQ4,SNTA1,CACNA2D3
GO: Molecular Function	GO:0048156	tau protein binding		8.559E-6	6.393E-3	2.459E-4	1.769E-3	7	46	MAP1A,MARK1,MARK3,S100B,TAOK1,DYRK1A,PPP5C
GO: Molecular Function	GO:0051431	corticotropin-releasing hormone receptor 2 binding		1.667E-5	1.245E-2	4.447E-4	3.199E-3	3	4	UCN,CRH,UCN3
GO: Molecular Function	GO:0030160	synaptic receptor adaptor activity		1.667E-5	1.245E-2	4.447E-4	3.199E-3	3	4	SHANK1,SHANK3,SHANK2
GO: Molecular Function	GO:0042393	histone binding		2.016E-5	1.506E-2	5.192E-4	3.735E-3	15	256	KDM5B,TSPYL2,ZMYND8,CHD2,KDM6B,KMT2E,NPM3,PHF2,KMT2C,TBL1X,KDM5A,CHD8,TBL1XR1,SMARCC2,PHF14
GO: Molecular Function	GO:1904315	transmitter-gated ion channel activity involved in regulation of postsynaptic membrane potential		2.237E-5	1.671E-2	5.570E-4	4.007E-3	7	53	GABRB2,GABRB3,GRIA2,GRIA3,GRIK5,GRIN2B,GABRA6
GO: Molecular Function	GO:0005546	phosphatidylinositol-4,5-bisphosphate binding		2.387E-5	1.783E-2	5.752E-4	4.138E-3	9	95	MARK1,SYTL2,SYT9,TULP1,FZD7,SYT5,APBA1,SYT7,CADPS
GO: Molecular Function	GO:0099529	neurotransmitter receptor activity involved in regulation of postsynaptic membrane potential		3.229E-5	2.412E-2	7.537E-4	5.422E-3	7	56	GABRB2,GABRB3,GRIA2,GRIA3,GRIK5,GRIN2B,GABRA6
GO: Molecular Function	GO:0000977	RNA polymerase II transcription regulatory region sequence-specific DNA binding		3.872E-5	2.892E-2	8.764E-4	6.305E-3	47	1583	MYT1L,SOX11,HDAC4,VEZF1,IRF6,CHD2,POGZ,BCL11A,FOXN3,NR6A1,KDM6B,FOXA1,HNF4G,ARNTL2,SOX7,SATB1,SPDEF,NR3C2,NKX2-2,DNMT3A,TCF4,TCF7L2,PCBP3,DEAF1,FOXP2,NACC1,NSD1,POU3F2,POU3F4,SKI,ADNP,CREB3L4,RFX3,RFX4,CREBBP,FOXP4,ZNF517,NKX2-4,ASCL2,MKX,NCOA1,FOXP1,RORB,PAX3,PAX5,TBR1,OLIG2
GO: Molecular Function	GO:0097110	scaffold protein binding		4.591E-5	3.430E-2	1.009E-3	7.257E-3	8	80	DLGAP3,CACNA1H,SHANK1,AKAP5,NLGN1,GRIN2B,CAV2,SHANK3
GO: Molecular Function	GO:0005109	frizzled binding		4.821E-5	3.601E-2	1.023E-3	7.362E-3	6	41	FZD1,WNT5B,FZD7,WNT3A,WNT3,WNT5A
GO: Molecular Function	GO:0005267	potassium channel activity		4.932E-5	3.684E-2	1.023E-3	7.362E-3	11	156	KCNMB2,KCNQ5,KCNMA1,KCNMB1,KCNN2,KCNQ2,KCNQ3,ANK2,GRIA2,GRIK5,KCNQ4
GO: Molecular Function	GO:0008013	beta-catenin binding		5.301E-5	3.960E-2	1.070E-3	7.699E-3	9	105	KDM6B,TBL1X,TCF4,TCF7L2,CHD8,GRIN2B,TBL1XR1,LZIC,CTNNB1
GO: Molecular Function	GO:0015269	calcium-activated potassium channel activity		5.961E-5	4.453E-2	1.148E-3	8.259E-3	4	14	KCNMB2,KCNMA1,KCNMB1,KCNN2
GO: Molecular Function	GO:0005544	calcium-dependent phospholipid binding		6.301E-5	4.707E-2	1.148E-3	8.259E-3	7	62	SYT9,SYT4,SYT5,SYT13,SYT2,SYT7,SYTL3
GO: Molecular Function	GO:0022835	transmitter-gated channel activity		6.301E-5	4.707E-2	1.148E-3	8.259E-3	7	62	GABRB2,GABRB3,GRIA2,GRIA3,GRIK5,GRIN2B,GABRA6
GO: Molecular Function	GO:0022824	transmitter-gated ion channel activity		6.301E-5	4.707E-2	1.148E-3	8.259E-3	7	62	GABRB2,GABRB3,GRIA2,GRIA3,GRIK5,GRIN2B,GABRA6
GO: Biological Process	GO:0098916	anterograde trans-synaptic signaling		1.039E-23	5.548E-20	2.774E-20	2.541E-19	68	1076	GABRB2,GABRB3,KCNMB2,NAT8L,DLGAP2,DLGAP1,CELF4,MAP1A,MAPT,ZMYND8,SYT9,PTEN,LRRC4,GFAP,SYNGAP1,S100B,DLGAP3,ARID1B,NTNG2,CAMK2N1,STXBP1,NRXN1,SCN1A,UCN,WNT3A,SCN2A,KCNMA1,KCNMB1,KCNN2,KCNQ2,KCNQ3,SYT4,SYT5,PPP1R9B,CACNA1H,NR3C2,GNAI1,SHANK1,CACNA1E,DRD2,AKAP5,ANK3,CALM2,CALM3,DLGAP4,APBA1,NTNG1,GRIA2,GRIK5,NLGN1,GRIN2B,SYT2,LRRC4C,CAV2,ADNP,SYT7,SHANK3,CRH,CRHR1,CCKBR,SLC6A1,SHANK2,CADPS,KCNQ4,LPA…
GO: Biological Process	GO:0007268	chemical synaptic transmission		1.039E-23	5.548E-20	2.774E-20	2.541E-19	68	1076	GABRB2,GABRB3,KCNMB2,NAT8L,DLGAP2,DLGAP1,CELF4,MAP1A,MAPT,ZMYND8,SYT9,PTEN,LRRC4,GFAP,SYNGAP1,S100B,DLGAP3,ARID1B,NTNG2,CAMK2N1,STXBP1,NRXN1,SCN1A,UCN,WNT3A,SCN2A,KCNMA1,KCNMB1,KCNN2,KCNQ2,KCNQ3,SYT4,SYT5,PPP1R9B,CACNA1H,NR3C2,GNAI1,SHANK1,CACNA1E,DRD2,AKAP5,ANK3,CALM2,CALM3,DLGAP4,APBA1,NTNG1,GRIA2,GRIK5,NLGN1,GRIN2B,SYT2,LRRC4C,CAV2,ADNP,SYT7,SHANK3,CRH,CRHR1,CCKBR,SLC6A1,SHANK2,CADPS,KCNQ4,LPA…
GO: Biological Process	GO:0099537	trans-synaptic signaling		1.664E-23	8.881E-20	2.960E-20	2.712E-19	68	1085	GABRB2,GABRB3,KCNMB2,NAT8L,DLGAP2,DLGAP1,CELF4,MAP1A,MAPT,ZMYND8,SYT9,PTEN,LRRC4,GFAP,SYNGAP1,S100B,DLGAP3,ARID1B,NTNG2,CAMK2N1,STXBP1,NRXN1,SCN1A,UCN,WNT3A,SCN2A,KCNMA1,KCNMB1,KCNN2,KCNQ2,KCNQ3,SYT4,SYT5,PPP1R9B,CACNA1H,NR3C2,GNAI1,SHANK1,CACNA1E,DRD2,AKAP5,ANK3,CALM2,CALM3,DLGAP4,APBA1,NTNG1,GRIA2,GRIK5,NLGN1,GRIN2B,SYT2,LRRC4C,CAV2,ADNP,SYT7,SHANK3,CRH,CRHR1,CCKBR,SLC6A1,SHANK2,CADPS,KCNQ4,LPA…
GO: Biological Process	GO:0099536	synaptic signaling		5.144E-23	2.746E-19	6.865E-20	6.288E-19	68	1107	GABRB2,GABRB3,KCNMB2,NAT8L,DLGAP2,DLGAP1,CELF4,MAP1A,MAPT,ZMYND8,SYT9,PTEN,LRRC4,GFAP,SYNGAP1,S100B,DLGAP3,ARID1B,NTNG2,CAMK2N1,STXBP1,NRXN1,SCN1A,UCN,WNT3A,SCN2A,KCNMA1,KCNMB1,KCNN2,KCNQ2,KCNQ3,SYT4,SYT5,PPP1R9B,CACNA1H,NR3C2,GNAI1,SHANK1,CACNA1E,DRD2,AKAP5,ANK3,CALM2,CALM3,DLGAP4,APBA1,NTNG1,GRIA2,GRIK5,NLGN1,GRIN2B,SYT2,LRRC4C,CAV2,ADNP,SYT7,SHANK3,CRH,CRHR1,CCKBR,SLC6A1,SHANK2,CADPS,KCNQ4,LPA…
GO: Biological Process	GO:0060322	head development		4.871E-20	2.600E-16	5.200E-17	4.763E-16	71	1359	GABRB3,SOX11,MAPT,HMGCS1,PAGR1,BCL11A,NR6A1,KDM6B,SSTR2,PTEN,PHF21A,SYNGAP1,CKB,FZD1,WNT5B,EFHC1,LDB1,NRXN1,NEGR1,NTM,WNT3A,SYT4,PPP1R9B,FGF13,NKX2-2,ADGRL2,TENT2,SHANK1,WHRN,VLDLR,TCF4,DPYSL2,XRN2,DRD2,TCF7L2,AKAP5,ANGPT1,FOXP2,GAS2L3,CALM2,CALM3,PTBP2,WNT3,WNT5A,DYRK1A,POU3F2,POU3F4,CHD8,SIN3A,GRIN2B,SKI,RFX4,CREBBP,SHANK3,CRH,CRHR1,CCKAR,CORO1A,SHANK2,NKX2-4,ASCL2,MACROD2,ANKRD11,NCOA1,FOXP1,R…
GO: Biological Process	GO:0007420	brain development		2.128E-19	1.136E-15	1.893E-16	1.734E-15	68	1289	GABRB3,SOX11,MAPT,HMGCS1,PAGR1,BCL11A,NR6A1,KDM6B,SSTR2,PTEN,SYNGAP1,CKB,FZD1,WNT5B,EFHC1,LDB1,NRXN1,NEGR1,NTM,WNT3A,SYT4,PPP1R9B,FGF13,NKX2-2,ADGRL2,TENT2,SHANK1,WHRN,VLDLR,TCF4,DPYSL2,XRN2,DRD2,TCF7L2,AKAP5,ANGPT1,FOXP2,GAS2L3,CALM2,CALM3,PTBP2,WNT3,WNT5A,DYRK1A,POU3F2,POU3F4,CHD8,SIN3A,GRIN2B,SKI,RFX4,SHANK3,CRH,CRHR1,CCKAR,CORO1A,SHANK2,NKX2-4,ASCL2,MACROD2,NCOA1,FOXP1,RORB,PAX5,CTNNB1,TBR1,O…
GO: Biological Process	GO:0007417	central nervous system development		3.167E-18	1.690E-14	2.415E-15	2.212E-14	77	1694	GABRB3,SOX11,SPAST,MAPT,HMGCS1,PAGR1,POGZ,BCL11A,NR6A1,KDM6B,SSTR2,PTEN,GFAP,SYNGAP1,CKB,FZD1,WNT5B,S100B,EFHC1,LDB1,NRXN1,NEGR1,SULF1,NTM,WNT3A,KCNQ3,SYT4,PPP1R9B,FGF13,NKX2-2,ADGRL2,DYNC1H1,TENT2,SHANK1,WHRN,VLDLR,TCF4,DPYSL2,XRN2,DRD2,TCF7L2,AKAP5,ANGPT1,FOXP2,GAS2L3,CALM2,CALM3,PTBP2,WNT3,WNT5A,DYRK1A,POU3F2,POU3F4,CHD8,SIN3A,GRIN2B,SKI,RFX4,LZIC,SHANK3,CRH,CRHR1,CCKAR,CORO1A,SHANK2,NKX2-4,AS…
GO: Biological Process	GO:0050804	modulation of chemical synaptic transmission		3.039E-16	1.622E-12	1.902E-13	1.742E-12	45	691	DLGAP2,DLGAP1,CELF4,MAP1A,MAPT,ZMYND8,PTEN,LRRC4,GFAP,SYNGAP1,S100B,DLGAP3,NTNG2,STXBP1,NRXN1,UCN,WNT3A,KCNN2,SYT4,PPP1R9B,NR3C2,GNAI1,SHANK1,DRD2,AKAP5,CALM2,CALM3,DLGAP4,APBA1,NTNG1,GRIA2,GRIK5,NLGN1,GRIN2B,LRRC4C,ADNP,SYT7,SHANK3,CRH,CRHR1,CCKBR,SLC6A1,SHANK2,KCNQ4,GRIP2
GO: Biological Process	GO:0099177	regulation of trans-synaptic signaling		3.207E-16	1.712E-12	1.902E-13	1.742E-12	45	692	DLGAP2,DLGAP1,CELF4,MAP1A,MAPT,ZMYND8,PTEN,LRRC4,GFAP,SYNGAP1,S100B,DLGAP3,NTNG2,STXBP1,NRXN1,UCN,WNT3A,KCNN2,SYT4,PPP1R9B,NR3C2,GNAI1,SHANK1,DRD2,AKAP5,CALM2,CALM3,DLGAP4,APBA1,NTNG1,GRIA2,GRIK5,NLGN1,GRIN2B,LRRC4C,ADNP,SYT7,SHANK3,CRH,CRHR1,CCKBR,SLC6A1,SHANK2,KCNQ4,GRIP2
GO: Biological Process	GO:0050808	synapse organization		9.901E-15	5.285E-11	5.167E-12	4.733E-11	39	576	GABRB2,GABRB3,DLGAP1,SPAST,MAPT,ZMYND8,ADGRB2,PTEN,LRRC4,ADD2,SYNGAP1,FZD1,DIP2A,DLGAP3,NTNG2,NRXN1,NEGR1,WNT3A,FGF13,ADGRL2,SHANK1,DRD2,ANK3,DSCAM,WNT5A,NTNG1,LRRC4B,CNKSR2,NLGN1,GRIN2B,LRRC4C,ADNP,SHANK3,SLC6A1,SHANK2,SETD5,GRIP2,CTNNB1,SNTA1
GO: Biological Process	GO:0048666	neuron development		1.065E-14	5.683E-11	5.167E-12	4.733E-11	70	1673	MYT1L,CHL1,GABRB2,GABRB3,SOX11,SPAST,MAP1A,MAP6,MAPT,MARK1,ZMYND8,BCL11A,PTEN,GFAP,TULP1,PTK7,SYNGAP1,BLK,FZD1,S100B,DIP2A,ARID1B,NTNG2,STXBP1,ABITRAM,NRXN1,NEGR1,NTM,UCN,WNT3A,SYT4,PPP1R9B,TAOK1,FGF13,NKX2-2,SHANK1,WHRN,VLDLR,DPYSL2,DPYSL3,DRD2,AKAP5,ANK3,DSCAM,WNT3,WNT5A,BAG5,NTNG1,POU3F2,LRRC4B,SIN3A,NLGN1,SYT2,LRRC4C,ADNP,SHANK3,OPCML,CCKAR,CORO1A,PPP2R5D,SHANK2,FOXP1,RORB,GRIP2,PAX5,TRAK2,CT…
GO: Biological Process	GO:0042391	regulation of membrane potential		1.485E-14	7.926E-11	6.605E-12	6.050E-11	38	554	GABRB2,GABRB3,KCNMB2,CELF4,MAPT,ZMYND8,PTEN,NRXN1,SCN1A,SCN2A,SCN4B,KCNMA1,KCNN2,KCNQ2,KCNQ3,CACNA1H,FGF13,NR3C2,SHANK1,CACNA1E,DRD2,ANK2,ANK3,CALM2,CALM3,GRIA2,GRIA3,GRIK5,NLGN1,GRIN2B,SHANK3,SHANK2,NUP155,FOXP1,UCN3,GRIP2,SNTA1,GABRA6
GO: Biological Process	GO:0007416	synapse assembly		4.197E-14	2.240E-10	1.723E-11	1.579E-10	25	236	GABRB2,GABRB3,SPAST,MAPT,ADGRB2,PTEN,LRRC4,ADD2,FZD1,NTNG2,NRXN1,NEGR1,WNT3A,FGF13,ADGRL2,SHANK1,DRD2,DSCAM,WNT5A,LRRC4B,NLGN1,ADNP,SHANK3,SHANK2,SETD5
GO: Biological Process	GO:0007610	behavior		7.554E-14	4.032E-10	2.880E-11	2.638E-10	49	940	CHL1,GABRB3,HDAC4,MAP1A,MAPT,POGZ,PTEN,PHF21A,SYNGAP1,QRFPR,S100B,AP2S1,NRXN1,NEGR1,SCN1A,UCN,SCN2A,KCNMA1,SYT4,PPP1R9B,FGF13,SHANK1,CACNA1E,VLDLR,DRD2,DEAF1,UBE2Q1,DSCAM,FOXP2,APBA1,CHD8,NLGN1,GRIN2B,ADNP,SHANK3,CRH,CRHR1,CCKAR,CCKBR,SLC6A1,SHANK2,SETD5,NCOA1,LSAMP,FOXP1,PAX5,TBR1,MBD5,PUM1
GO: Biological Process	GO:0031175	neuron projection development		2.882E-13	1.538E-9	1.026E-10	9.395E-10	61	1424	CHL1,SPAST,MAP1A,MAP6,MAPT,MARK1,ZMYND8,BCL11A,PTEN,GFAP,TULP1,PTK7,SYNGAP1,BLK,FZD1,S100B,DIP2A,ARID1B,NTNG2,STXBP1,ABITRAM,NRXN1,NEGR1,NTM,UCN,WNT3A,SYT4,PPP1R9B,TAOK1,FGF13,NKX2-2,SHANK1,WHRN,VLDLR,DPYSL2,DPYSL3,DRD2,AKAP5,ANK3,DSCAM,WNT3,WNT5A,BAG5,NTNG1,POU3F2,LRRC4B,SIN3A,NLGN1,SYT2,LRRC4C,ADNP,SHANK3,CCKAR,CORO1A,PPP2R5D,SHANK2,FOXP1,TRAK2,CTNNB1,TBR1,MYO16
GO: Biological Process	GO:0050890	cognition		1.916E-12	1.023E-8	6.394E-10	5.857E-9	30	409	CHL1,GABRB3,MAP1A,MAPT,PTEN,SYNGAP1,S100B,AP2S1,NRXN1,UCN,SCN2A,SYT4,PPP1R9B,FGF13,SHANK1,CACNA1E,VLDLR,DRD2,DEAF1,FOXP2,CHD8,GRIN2B,ADNP,SHANK3,CRH,CRHR1,SLC6A1,SHANK2,SETD5,TBR1
GO: Biological Process	GO:0007611	learning or memory		3.052E-12	1.629E-8	9.585E-10	8.780E-9	28	362	GABRB3,MAP1A,MAPT,PTEN,SYNGAP1,S100B,AP2S1,NRXN1,UCN,SCN2A,SYT4,PPP1R9B,FGF13,SHANK1,CACNA1E,VLDLR,DRD2,DEAF1,FOXP2,CHD8,GRIN2B,ADNP,SHANK3,CRH,CRHR1,SLC6A1,SHANK2,TBR1
GO: Biological Process	GO:0006325	chromatin organization		6.726E-12	3.591E-8	1.995E-9	1.827E-8	45	916	KDM5B,HDAC4,TSPYL2,ASH1L,CHD2,PAGR1,KDM6B,KMT2E,FOXA1,TRIP12,PHF21A,NPM3,WAC,BAP1,PHF2,KMT2C,ARID1B,LDB1,SATB1,UCN,TBL1X,DNMT3A,TLK2,KDM5A,DPPA2,NSD1,CENPO,CHD8,SIN3A,NAA50,SKI,TBL1XR1,CREBBP,KANSL1,PPP5C,KMT5B,SETD5,GATAD1,NCOA1,SMARCC2,PHF14,ASXL2,PAX5,CTNNB1,H3C14
GO: Biological Process	GO:0048812	neuron projection morphogenesis		9.279E-12	4.953E-8	2.607E-9	2.388E-8	46	961	CHL1,SPAST,MAP1A,MAP6,MAPT,BCL11A,PTEN,SYNGAP1,S100B,DIP2A,NTNG2,STXBP1,ABITRAM,NRXN1,WNT3A,SYT4,TAOK1,FGF13,NKX2-2,SHANK1,VLDLR,DPYSL2,DPYSL3,DRD2,AKAP5,ANK3,DSCAM,WNT3,WNT5A,NTNG1,POU3F2,LRRC4B,SIN3A,NLGN1,SYT2,LRRC4C,ADNP,SHANK3,CCKAR,CORO1A,SHANK2,FOXP1,TRAK2,CTNNB1,TBR1,MYO16
GO: Biological Process	GO:0099084	postsynaptic specialization organization		1.428E-11	7.625E-8	3.812E-9	3.492E-8	12	51	DLGAP1,ZMYND8,PTEN,LRRC4,SYNGAP1,NTNG2,NRXN1,SHANK1,LRRC4B,NLGN1,SHANK3,SHANK2
GO: Biological Process	GO:0120039	plasma membrane bounded cell projection morphogenesis		1.625E-11	8.676E-8	4.131E-9	3.784E-8	46	977	CHL1,SPAST,MAP1A,MAP6,MAPT,BCL11A,PTEN,SYNGAP1,S100B,DIP2A,NTNG2,STXBP1,ABITRAM,NRXN1,WNT3A,SYT4,TAOK1,FGF13,NKX2-2,SHANK1,VLDLR,DPYSL2,DPYSL3,DRD2,AKAP5,ANK3,DSCAM,WNT3,WNT5A,NTNG1,POU3F2,LRRC4B,SIN3A,NLGN1,SYT2,LRRC4C,ADNP,SHANK3,CCKAR,CORO1A,SHANK2,FOXP1,TRAK2,CTNNB1,TBR1,MYO16
GO: Biological Process	GO:0030900	forebrain development		1.861E-11	9.936E-8	4.516E-9	4.137E-8	35	601	KDM6B,SSTR2,PTEN,EFHC1,WNT3A,PPP1R9B,FGF13,TENT2,VLDLR,DPYSL2,XRN2,DRD2,TCF7L2,AKAP5,FOXP2,WNT3,WNT5A,POU3F2,POU3F4,CHD8,SIN3A,GRIN2B,SKI,RFX4,SHANK3,CRH,CRHR1,CCKAR,NKX2-4,NCOA1,FOXP1,PAX5,CTNNB1,TBR1,OLIG2
GO: Biological Process	GO:0048858	cell projection morphogenesis		2.068E-11	1.104E-7	4.800E-9	4.397E-8	46	984	CHL1,SPAST,MAP1A,MAP6,MAPT,BCL11A,PTEN,SYNGAP1,S100B,DIP2A,NTNG2,STXBP1,ABITRAM,NRXN1,WNT3A,SYT4,TAOK1,FGF13,NKX2-2,SHANK1,VLDLR,DPYSL2,DPYSL3,DRD2,AKAP5,ANK3,DSCAM,WNT3,WNT5A,NTNG1,POU3F2,LRRC4B,SIN3A,NLGN1,SYT2,LRRC4C,ADNP,SHANK3,CCKAR,CORO1A,SHANK2,FOXP1,TRAK2,CTNNB1,TBR1,MYO16
GO: Biological Process	GO:0032990	cell part morphogenesis		4.640E-11	2.477E-7	1.032E-8	9.454E-8	46	1008	CHL1,SPAST,MAP1A,MAP6,MAPT,BCL11A,PTEN,SYNGAP1,S100B,DIP2A,NTNG2,STXBP1,ABITRAM,NRXN1,WNT3A,SYT4,TAOK1,FGF13,NKX2-2,SHANK1,VLDLR,DPYSL2,DPYSL3,DRD2,AKAP5,ANK3,DSCAM,WNT3,WNT5A,NTNG1,POU3F2,LRRC4B,SIN3A,NLGN1,SYT2,LRRC4C,ADNP,SHANK3,CCKAR,CORO1A,SHANK2,FOXP1,TRAK2,CTNNB1,TBR1,MYO16
GO: Biological Process	GO:0034330	cell junction organization		4.896E-11	2.614E-7	1.045E-8	9.576E-8	43	899	GABRB2,GABRB3,DLGAP1,SPAST,MAPT,ZMYND8,ADGRB2,PTEN,LRRC4,ADD2,SYNGAP1,FZD1,DIP2A,DLGAP3,NTNG2,LDB1,NRXN1,NEGR1,WNT3A,FGF13,ADGRL2,SHANK1,WHRN,DRD2,ANK3,DSCAM,WNT5A,PKP4,NTNG1,LRRC4B,CNKSR2,NLGN1,GRIN2B,LRRC4C,TEK,ADNP,SHANK3,SLC6A1,SHANK2,SETD5,GRIP2,CTNNB1,SNTA1
GO: Biological Process	GO:0007612	learning		6.474E-11	3.456E-7	1.296E-8	1.187E-7	20	204	GABRB3,MAP1A,SYNGAP1,AP2S1,NRXN1,UCN,PPP1R9B,FGF13,SHANK1,CACNA1E,DRD2,DEAF1,FOXP2,GRIN2B,SHANK3,CRH,CRHR1,SLC6A1,SHANK2,TBR1
GO: Biological Process	GO:0097106	postsynaptic density organization		6.556E-11	3.500E-7	1.296E-8	1.187E-7	11	45	DLGAP1,ZMYND8,PTEN,LRRC4,SYNGAP1,NRXN1,SHANK1,LRRC4B,NLGN1,SHANK3,SHANK2
GO: Biological Process	GO:0043269	regulation of ion transport		6.957E-11	3.714E-7	1.326E-8	1.215E-7	62	1665	NAT8L,KDM5B,TM9SF4,SYTL2,SYT9,PTEN,BAP1,BLK,CAMK2N1,STXBP1,KCNQ5,NRXN1,SCN1A,UCN,SCN2A,SCN4B,KCNMA1,KCNMB1,KCNN2,KCNQ2,KCNQ3,SYT4,SYT5,CACNA1H,FGF13,TESC,SYT13,SHANK1,CACNA1E,DPYSL2,DRD2,TCF7L2,AKAP5,ANGPT1,ANK2,ANK3,CALM2,CALM3,GRIA2,GRIA3,NLGN1,GRIN2B,SYT2,ADTRP,TEK,RFX3,SYT7,COA8,SHANK3,CRH,CRHR1,CCKAR,CCKBR,TMEM33,SLC6A1,CORO1A,SHANK2,KCNQ4,UCN3,CTNNB1,SNTA1,CACNA2D3
GO: Biological Process	GO:0016570	histone modification		9.272E-11	4.950E-7	1.707E-8	1.563E-7	32	540	KDM5B,HDAC4,ASH1L,PAGR1,KDM6B,KMT2E,TRIP12,WAC,BAP1,PHF2,KMT2C,LDB1,SATB1,UCN,TBL1X,KDM5A,DPPA2,NSD1,SIN3A,NAA50,SKI,TBL1XR1,CREBBP,KANSL1,PPP5C,KMT5B,SETD5,NCOA1,PHF14,ASXL2,PAX5,CTNNB1
GO: Biological Process	GO:0060078	regulation of postsynaptic membrane potential		2.034E-10	1.086E-6	3.410E-8	3.123E-7	18	172	GABRB2,GABRB3,CELF4,ZMYND8,PTEN,NRXN1,NR3C2,SHANK1,DRD2,GRIA2,GRIA3,GRIK5,NLGN1,GRIN2B,SHANK3,SHANK2,GRIP2,GABRA6
GO: Biological Process	GO:1903508	positive regulation of nucleic acid-templated transcription		2.061E-10	1.100E-6	3.410E-8	3.123E-7	65	1841	MYT1L,SOX11,HDAC4,VEZF1,ASH1L,IRF6,PAGR1,POGZ,NR6A1,KDM6B,KMT2E,FOXA1,HNF4G,ARNTL2,WAC,FZD1,FZD7,PHF2,SOX7,KMT2C,ARID1B,LDB1,UCN,WNT3A,SPDEF,IRF2BPL,NKX2-2,TESC,SLC30A9,MMP12,TBL1X,TCF4,DRD2,TCF7L2,DEAF1,TCF20,KDM5A,WNT5A,DYRK1A,NSD1,POU3F2,CHD8,SIN3A,SKI,CREB3L4,RFX3,TBL1XR1,RFX4,CREBBP,PPP2R5D,PDLIM1,ASCL2,ASXL3,MKX,NCOA1,SMARCC2,FOXP1,RORB,ASXL2,PAX3,PAX5,CTNNB1,TBR1,TNNI2,RAI1
GO: Biological Process	GO:0045893	positive regulation of transcription, DNA-templated		2.061E-10	1.100E-6	3.410E-8	3.123E-7	65	1841	MYT1L,SOX11,HDAC4,VEZF1,ASH1L,IRF6,PAGR1,POGZ,NR6A1,KDM6B,KMT2E,FOXA1,HNF4G,ARNTL2,WAC,FZD1,FZD7,PHF2,SOX7,KMT2C,ARID1B,LDB1,UCN,WNT3A,SPDEF,IRF2BPL,NKX2-2,TESC,SLC30A9,MMP12,TBL1X,TCF4,DRD2,TCF7L2,DEAF1,TCF20,KDM5A,WNT5A,DYRK1A,NSD1,POU3F2,CHD8,SIN3A,SKI,CREB3L4,RFX3,TBL1XR1,RFX4,CREBBP,PPP2R5D,PDLIM1,ASCL2,ASXL3,MKX,NCOA1,SMARCC2,FOXP1,RORB,ASXL2,PAX3,PAX5,CTNNB1,TBR1,TNNI2,RAI1
GO: Biological Process	GO:1902680	positive regulation of RNA biosynthetic process		2.108E-10	1.125E-6	3.410E-8	3.123E-7	65	1842	MYT1L,SOX11,HDAC4,VEZF1,ASH1L,IRF6,PAGR1,POGZ,NR6A1,KDM6B,KMT2E,FOXA1,HNF4G,ARNTL2,WAC,FZD1,FZD7,PHF2,SOX7,KMT2C,ARID1B,LDB1,UCN,WNT3A,SPDEF,IRF2BPL,NKX2-2,TESC,SLC30A9,MMP12,TBL1X,TCF4,DRD2,TCF7L2,DEAF1,TCF20,KDM5A,WNT5A,DYRK1A,NSD1,POU3F2,CHD8,SIN3A,SKI,CREB3L4,RFX3,TBL1XR1,RFX4,CREBBP,PPP2R5D,PDLIM1,ASCL2,ASXL3,MKX,NCOA1,SMARCC2,FOXP1,RORB,ASXL2,PAX3,PAX5,CTNNB1,TBR1,TNNI2,RAI1
GO: Biological Process	GO:0048667	cell morphogenesis involved in neuron differentiation		2.442E-10	1.304E-6	3.834E-8	3.512E-7	42	909	CHL1,SPAST,MAP1A,MAP6,MAPT,BCL11A,PTEN,SYNGAP1,S100B,DIP2A,NTNG2,STXBP1,ABITRAM,NRXN1,WNT3A,FGF13,NKX2-2,SHANK1,WHRN,VLDLR,DPYSL2,DPYSL3,DRD2,AKAP5,ANK3,DSCAM,WNT3,WNT5A,NTNG1,POU3F2,LRRC4B,SIN3A,NLGN1,LRRC4C,ADNP,SHANK3,CCKAR,CORO1A,SHANK2,FOXP1,TRAK2,TBR1
GO: Biological Process	GO:0051254	positive regulation of RNA metabolic process		2.710E-10	1.447E-6	4.133E-8	3.786E-7	67	1942	MYT1L,SOX11,CELF4,HDAC4,VEZF1,ASH1L,IRF6,PAGR1,POGZ,NR6A1,KDM6B,KMT2E,FOXA1,HNF4G,ARNTL2,WAC,FZD1,FZD7,PHF2,SOX7,KMT2C,ARID1B,LDB1,UCN,WNT3A,SPDEF,IRF2BPL,NKX2-2,TESC,SLC30A9,MMP12,TBL1X,TCF4,DRD2,TCF7L2,DEAF1,TCF20,KDM5A,WNT5A,DYRK1A,NSD1,POU3F2,CHD8,SIN3A,SKI,CREB3L4,RFX3,TBL1XR1,RFX4,CREBBP,PPP2R5D,PDLIM1,ASCL2,ASXL3,MKX,NCOA1,SMARCC2,FOXP1,RORB,ASXL2,PAX3,PAX5,CTNNB1,TBR1,TNNI2,PUM1,RAI1
GO: Biological Process	GO:0007613	memory		2.973E-10	1.587E-6	4.408E-8	4.038E-7	18	176	GABRB3,MAP1A,MAPT,PTEN,S100B,SCN2A,SYT4,FGF13,SHANK1,VLDLR,DRD2,CHD8,GRIN2B,ADNP,SHANK3,CRHR1,SLC6A1,SHANK2
GO: Biological Process	GO:0045934	negative regulation of nucleobase-containing compound metabolic process		4.246E-10	2.266E-6	6.126E-8	5.611E-7	63	1785	MYT1L,SOX11,KDM5B,CELF4,HDAC4,IRF2BP1,ZMYND8,BCL11A,FOXN3,NR6A1,FOXA1,TRIP12,PHF21A,BAP1,FZD1,PHF2,SOX7,LDB1,SATB1,PINX1,SPDEF,IRF2BPL,MMP12,TENT2,TBL1X,DNMT3A,NRIP2,TRAF7,TCF4,TCF7L2,PCBP3,DEAF1,FOXP2,KDM5A,NACC1,PTBP2,PHF12,WNT5A,DYRK1A,NSD1,CHD8,SIN3A,SKI,RFX3,TBL1XR1,CREBBP,NCOA5,FOXP4,ASCL2,MKX,SMARCC2,FOXP1,PHF14,RORB,ASXL2,PAX3,VGLL4,PAX5,CTNNB1,TBR1,POLQ,OLIG2,H3C14
GO: Biological Process	GO:0051253	negative regulation of RNA metabolic process		6.125E-10	3.269E-6	8.603E-8	7.881E-7	60	1670	MYT1L,SOX11,KDM5B,CELF4,HDAC4,IRF2BP1,ZMYND8,BCL11A,FOXN3,NR6A1,FOXA1,PHF21A,BAP1,FZD1,PHF2,SOX7,LDB1,SATB1,SPDEF,IRF2BPL,MMP12,TENT2,TBL1X,DNMT3A,NRIP2,TRAF7,TCF4,TCF7L2,PCBP3,DEAF1,FOXP2,KDM5A,NACC1,PTBP2,PHF12,WNT5A,DYRK1A,NSD1,CHD8,SIN3A,SKI,RFX3,TBL1XR1,CREBBP,NCOA5,FOXP4,ASCL2,MKX,SMARCC2,FOXP1,PHF14,RORB,ASXL2,PAX3,VGLL4,PAX5,CTNNB1,TBR1,OLIG2,H3C14
GO: Biological Process	GO:1904861	excitatory synapse assembly		6.827E-10	3.644E-6	9.298E-8	8.517E-7	9	31	PTEN,LRRC4,NRXN1,SHANK1,WNT5A,LRRC4B,NLGN1,SHANK3,SHANK2
GO: Biological Process	GO:0034765	regulation of ion transmembrane transport		6.968E-10	3.719E-6	9.298E-8	8.517E-7	35	687	PTEN,KCNQ5,NRXN1,SCN1A,SCN2A,SCN4B,KCNMA1,KCNMB1,KCNN2,KCNQ2,KCNQ3,CACNA1H,FGF13,TESC,SHANK1,CACNA1E,DRD2,ANK2,ANK3,CALM2,CALM3,GRIA2,GRIA3,NLGN1,GRIN2B,COA8,SHANK3,CRH,CRHR1,TMEM33,CORO1A,SHANK2,KCNQ4,SNTA1,CACNA2D3
GO: Biological Process	GO:0034762	regulation of transmembrane transport		8.121E-10	4.335E-6	1.057E-7	9.684E-7	35	691	PTEN,KCNQ5,NRXN1,SCN1A,SCN2A,SCN4B,KCNMA1,KCNMB1,KCNN2,KCNQ2,KCNQ3,CACNA1H,FGF13,TESC,SHANK1,CACNA1E,DRD2,ANK2,ANK3,CALM2,CALM3,GRIA2,GRIA3,NLGN1,GRIN2B,COA8,SHANK3,CRH,CRHR1,TMEM33,CORO1A,SHANK2,KCNQ4,SNTA1,CACNA2D3
GO: Biological Process	GO:0051276	chromosome organization		9.237E-10	4.931E-6	1.174E-7	1.075E-6	53	1389	KDM5B,HDAC4,MAPT,TSPYL2,ASH1L,CHD2,PAGR1,POGZ,KDM6B,KMT2E,FOXA1,TRIP12,PHF21A,NPM3,WAC,BAP1,PHF2,KMT2C,ARID1B,LDB1,SATB1,UCN,PINX1,TBL1X,DNMT3A,RAD51C,TLK2,TCF7L2,KDM5A,DPPA2,NSD1,CENPO,CHD8,SIN3A,NAA50,XRCC3,SKI,TBL1XR1,CREBBP,KANSL1,NUP155,PPP5C,KMT5B,SETD5,GATAD1,NCOA1,SMARCC2,PHF14,ASXL2,PAX5,CTNNB1,POLQ,H3C14
GO: Biological Process	GO:0010975	regulation of neuron projection development		9.807E-10	5.235E-6	1.217E-7	1.115E-6	33	627	SPAST,MAP6,MAPT,MARK1,BCL11A,PTEN,GFAP,PTK7,SYNGAP1,FZD1,NTNG2,NEGR1,NTM,WNT3A,FGF13,VLDLR,DPYSL2,DPYSL3,AKAP5,DSCAM,WNT3,WNT5A,BAG5,NTNG1,POU3F2,LRRC4B,NLGN1,LRRC4C,ADNP,SHANK3,PPP2R5D,TRAK2,TBR1
GO: Biological Process	GO:0032989	cellular component morphogenesis		1.315E-9	7.022E-6	1.596E-7	1.462E-6	47	1157	CHL1,SPAST,MAP1A,MAP6,MAPT,BCL11A,PTEN,SYNGAP1,S100B,DIP2A,NTNG2,STXBP1,ABITRAM,NRXN1,WNT3A,SYT4,TAOK1,FGF13,NKX2-2,SHANK1,VLDLR,DPYSL2,DPYSL3,DRD2,AKAP5,ANK3,DSCAM,WNT3,WNT5A,NTNG1,POU3F2,LRRC4B,SIN3A,NLGN1,SYT2,LRRC4C,ADNP,SHANK3,CCKAR,CORO1A,SHANK2,FOXP1,TRAK2,CTNNB1,TBR1,TNNI2,MYO16
GO: Biological Process	GO:0010038	response to metal ion		1.558E-9	8.317E-6	1.837E-7	1.683E-6	31	571	GABRB3,KCNMB2,MAPT,SYT9,PTEN,NRXN1,KCNMA1,KCNMB1,SYT4,SYT5,CACNA1H,SMPD3,SPAG16,SYT13,DNMT3A,DRD2,TCF7L2,ANK3,CALM2,CALM3,WNT5A,GRIA2,GRIA3,NLGN1,GRIN2B,SYT2,SYT7,SLC6A1,PPP5C,ELN,CTNNB1
GO: Biological Process	GO:0045892	negative regulation of transcription, DNA-templated		1.583E-9	8.452E-6	1.837E-7	1.683E-6	56	1538	MYT1L,SOX11,KDM5B,HDAC4,IRF2BP1,ZMYND8,BCL11A,FOXN3,NR6A1,FOXA1,PHF21A,BAP1,FZD1,PHF2,SOX7,LDB1,SATB1,SPDEF,IRF2BPL,MMP12,TBL1X,DNMT3A,NRIP2,TRAF7,TCF4,TCF7L2,PCBP3,DEAF1,FOXP2,KDM5A,NACC1,PHF12,WNT5A,NSD1,CHD8,SIN3A,SKI,RFX3,TBL1XR1,CREBBP,NCOA5,FOXP4,ASCL2,MKX,SMARCC2,FOXP1,PHF14,RORB,ASXL2,PAX3,VGLL4,PAX5,CTNNB1,TBR1,OLIG2,H3C14
GO: Biological Process	GO:1903507	negative regulation of nucleic acid-templated transcription		1.660E-9	8.860E-6	1.885E-7	1.727E-6	56	1540	MYT1L,SOX11,KDM5B,HDAC4,IRF2BP1,ZMYND8,BCL11A,FOXN3,NR6A1,FOXA1,PHF21A,BAP1,FZD1,PHF2,SOX7,LDB1,SATB1,SPDEF,IRF2BPL,MMP12,TBL1X,DNMT3A,NRIP2,TRAF7,TCF4,TCF7L2,PCBP3,DEAF1,FOXP2,KDM5A,NACC1,PHF12,WNT5A,NSD1,CHD8,SIN3A,SKI,RFX3,TBL1XR1,CREBBP,NCOA5,FOXP4,ASCL2,MKX,SMARCC2,FOXP1,PHF14,RORB,ASXL2,PAX3,VGLL4,PAX5,CTNNB1,TBR1,OLIG2,H3C14
GO: Biological Process	GO:0099601	regulation of neurotransmitter receptor activity		1.717E-9	9.166E-6	1.910E-7	1.749E-6	13	92	DLGAP2,DLGAP1,DLGAP3,NRXN1,SHANK1,DLGAP4,GRIA2,GRIA3,NLGN1,GRIN2B,SHANK3,CRH,SHANK2
GO: Biological Process	GO:1902679	negative regulation of RNA biosynthetic process		1.823E-9	9.733E-6	1.986E-7	1.819E-6	56	1544	MYT1L,SOX11,KDM5B,HDAC4,IRF2BP1,ZMYND8,BCL11A,FOXN3,NR6A1,FOXA1,PHF21A,BAP1,FZD1,PHF2,SOX7,LDB1,SATB1,SPDEF,IRF2BPL,MMP12,TBL1X,DNMT3A,NRIP2,TRAF7,TCF4,TCF7L2,PCBP3,DEAF1,FOXP2,KDM5A,NACC1,PHF12,WNT5A,NSD1,CHD8,SIN3A,SKI,RFX3,TBL1XR1,CREBBP,NCOA5,FOXP4,ASCL2,MKX,SMARCC2,FOXP1,PHF14,RORB,ASXL2,PAX3,VGLL4,PAX5,CTNNB1,TBR1,OLIG2,H3C14
GO: Biological Process	GO:0000904	cell morphogenesis involved in differentiation		2.490E-9	1.329E-5	2.659E-7	2.435E-6	45	1100	CHL1,SPAST,MAP1A,MAP6,MAPT,BCL11A,PTEN,SYNGAP1,FZD7,S100B,DIP2A,NTNG2,STXBP1,ABITRAM,NRXN1,WNT3A,FGF13,NKX2-2,SHANK1,WHRN,VLDLR,DPYSL2,DPYSL3,DRD2,AKAP5,ANK3,DSCAM,WNT3,WNT5A,NTNG1,POU3F2,LRRC4B,SIN3A,NLGN1,LRRC4C,TEK,ADNP,SHANK3,CCKAR,CORO1A,SHANK2,FOXP1,TRAK2,CTNNB1,TBR1
GO: Biological Process	GO:0034329	cell junction assembly		2.593E-9	1.384E-5	2.714E-7	2.486E-6	29	517	GABRB2,GABRB3,SPAST,MAPT,ADGRB2,PTEN,LRRC4,ADD2,FZD1,NTNG2,LDB1,NRXN1,NEGR1,WNT3A,FGF13,ADGRL2,SHANK1,DRD2,DSCAM,WNT5A,PKP4,LRRC4B,NLGN1,TEK,ADNP,SHANK3,SHANK2,SETD5,CTNNB1
GO: Biological Process	GO:0021537	telencephalon development		3.050E-9	1.628E-5	3.131E-7	2.868E-6	24	365	KDM6B,PTEN,EFHC1,WNT3A,PPP1R9B,FGF13,TENT2,VLDLR,DPYSL2,XRN2,DRD2,AKAP5,FOXP2,WNT5A,POU3F2,GRIN2B,SKI,RFX4,SHANK3,NCOA1,FOXP1,PAX5,CTNNB1,TBR1
GO: Biological Process	GO:0051960	regulation of nervous system development		3.632E-9	1.939E-5	3.599E-7	3.296E-6	32	626	SOX11,SPAST,MAP6,MAPT,ADGRB2,BCL11A,PTEN,GFAP,SYNGAP1,S100B,NRXN1,WNT3A,SYT4,FGF13,NKX2-2,ADGRL2,DRD2,TCF7L2,AKAP5,DSCAM,WNT3,WNT5A,LRRC4B,NLGN1,SKI,ADNP,SHANK3,ASCL2,ELAVL3,TRAK2,CTNNB1,OLIG2
GO: Biological Process	GO:0007409	axonogenesis		3.641E-9	1.943E-5	3.599E-7	3.296E-6	35	732	CHL1,SPAST,MAP1A,MAP6,MAPT,BCL11A,PTEN,SYNGAP1,S100B,NTNG2,STXBP1,NRXN1,WNT3A,FGF13,NKX2-2,VLDLR,DPYSL2,DPYSL3,DRD2,ANK3,DSCAM,WNT3,WNT5A,NTNG1,POU3F2,LRRC4B,SIN3A,LRRC4C,ADNP,SHANK3,CCKAR,CORO1A,FOXP1,TRAK2,TBR1
GO: Biological Process	GO:0044057	regulation of system process		4.294E-9	2.292E-5	4.167E-7	3.817E-6	37	810	KCNMB2,DLGAP2,DLGAP1,CELF4,HDAC4,ZMYND8,SSTR2,PTEN,S100B,DLGAP3,NRXN1,UCN,SCN4B,KCNMA1,KCNN2,CACNA1H,FGF13,SHANK1,CACNA1E,DRD2,ANK2,CALM2,CALM3,DLGAP4,NLGN1,SKI,SHANK3,CRH,CRHR1,CCKBR,SHANK2,NUP155,FOXP1,GRIP2,TNNI2,SNTA1,CACNA2D3
GO: Biological Process	GO:0006812	cation transport		4.970E-9	2.653E-5	4.700E-7	4.305E-6	53	1458	KCNMB2,NAT8L,SYT9,PTEN,WNT5B,KCNQ5,NRXN1,SCN1A,UCN,WNT3A,SCN2A,SCN4B,KCNMA1,KCNMB1,KCNN2,KCNQ2,KCNQ3,SYT4,SYT5,CACNA1H,FGF13,TESC,SMPD3,SLC30A9,SYT13,SHANK1,CACNA1E,DRD2,AKAP5,ANK2,ANK3,CALM2,CALM3,GRIA2,GRIA3,NLGN1,GRIN2B,SYT2,SYT7,COA8,SHANK3,CRH,CRHR1,CCKAR,CCKBR,TMEM33,SLC6A1,CORO1A,SHANK2,KCNQ4,CTNNB1,SNTA1,CACNA2D3
GO: Biological Process	GO:0099068	postsynapse assembly		5.019E-9	2.679E-5	4.700E-7	4.305E-6	9	38	PTEN,NTNG2,NRXN1,SHANK1,WNT5A,LRRC4B,NLGN1,SHANK3,SHANK2
GO: Biological Process	GO:0120035	regulation of plasma membrane bounded cell projection organization		5.169E-9	2.759E-5	4.757E-7	4.357E-6	39	891	SPAST,HDAC4,MAP6,MAPT,MARK1,ZMYND8,BCL11A,PTEN,GFAP,PLEKHM1,PTK7,SYNGAP1,FZD1,NTNG2,ABITRAM,NRXN1,NEGR1,NTM,WNT3A,FGF13,VLDLR,DPYSL2,DPYSL3,AKAP5,DSCAM,WNT3,WNT5A,BAG5,NTNG1,POU3F2,LRRC4B,NLGN1,GRIN2B,LRRC4C,ADNP,SHANK3,PPP2R5D,TRAK2,TBR1
GO: Biological Process	GO:0001508	action potential		6.000E-9	3.203E-5	5.428E-7	4.972E-6	18	212	KCNMB2,SCN1A,SCN2A,SCN4B,KCNMA1,KCNN2,KCNQ2,CACNA1H,FGF13,CACNA1E,ANK2,ANK3,CALM2,CALM3,GRIN2B,NUP155,FOXP1,SNTA1
GO: Biological Process	GO:0000122	negative regulation of transcription by RNA polymerase II		8.648E-9	4.616E-5	7.694E-7	7.047E-6	43	1065	MYT1L,SOX11,HDAC4,IRF2BP1,BCL11A,NR6A1,FOXA1,PHF21A,LDB1,SATB1,SPDEF,IRF2BPL,MMP12,TBL1X,DNMT3A,NRIP2,TRAF7,TCF4,TCF7L2,PCBP3,DEAF1,FOXP2,KDM5A,NACC1,PHF12,NSD1,CHD8,SIN3A,SKI,TBL1XR1,CREBBP,NCOA5,FOXP4,ASCL2,MKX,SMARCC2,FOXP1,PHF14,ASXL2,PAX3,PAX5,CTNNB1,OLIG2
GO: Biological Process	GO:0031344	regulation of cell projection organization		9.500E-9	5.071E-5	8.314E-7	7.615E-6	39	911	SPAST,HDAC4,MAP6,MAPT,MARK1,ZMYND8,BCL11A,PTEN,GFAP,PLEKHM1,PTK7,SYNGAP1,FZD1,NTNG2,ABITRAM,NRXN1,NEGR1,NTM,WNT3A,FGF13,VLDLR,DPYSL2,DPYSL3,AKAP5,DSCAM,WNT3,WNT5A,BAG5,NTNG1,POU3F2,LRRC4B,NLGN1,GRIN2B,LRRC4C,ADNP,SHANK3,PPP2R5D,TRAK2,TBR1
GO: Biological Process	GO:0098698	postsynaptic specialization assembly		9.784E-9	5.223E-5	8.424E-7	7.716E-6	8	29	PTEN,NTNG2,NRXN1,SHANK1,LRRC4B,NLGN1,SHANK3,SHANK2
GO: Biological Process	GO:0051592	response to calcium ion		1.075E-8	5.738E-5	9.107E-7	8.342E-6	17	195	KCNMB2,SYT9,NRXN1,KCNMA1,KCNMB1,SYT4,SYT5,SPAG16,SYT13,CALM2,CALM3,WNT5A,NLGN1,GRIN2B,SYT2,SYT7,SLC6A1
GO: Biological Process	GO:0051952	regulation of amine transport		1.349E-8	7.200E-5	1.125E-6	1.030E-5	14	129	NAT8L,SYT9,STXBP1,SYT4,SYT5,SYT13,DPYSL2,DRD2,GRIN2B,SYT2,SYT7,CRH,CRHR1,SLC6A1
GO: Biological Process	GO:0010558	negative regulation of macromolecule biosynthetic process		1.419E-8	7.574E-5	1.165E-6	1.067E-5	61	1861	MYT1L,SOX11,KDM5B,CELF4,HDAC4,IRF2BP1,TSPYL2,ZMYND8,BCL11A,FOXN3,NR6A1,FOXA1,PHF21A,BAP1,FZD1,PHF2,SOX7,LDB1,SATB1,PINX1,SPDEF,IRF2BPL,SMPD3,MMP12,TBL1X,DNMT3A,NRIP2,TRAF7,TCF4,TCF7L2,PCBP3,DEAF1,FOXP2,KDM5A,NACC1,PHF12,WNT5A,NSD1,CHD8,SIN3A,SKI,RFX3,TBL1XR1,CREBBP,NCOA5,FOXP4,ASCL2,MKX,SMARCC2,FOXP1,PHF14,RORB,ASXL2,PAX3,VGLL4,PAX5,CTNNB1,TBR1,PUM1,OLIG2,H3C14
GO: Biological Process	GO:1904062	regulation of cation transmembrane transport		1.537E-8	8.203E-5	1.243E-6	1.138E-5	25	428	PTEN,NRXN1,SCN4B,KCNMB1,KCNN2,FGF13,TESC,SHANK1,DRD2,ANK2,ANK3,CALM2,CALM3,GRIA2,GRIA3,NLGN1,GRIN2B,COA8,SHANK3,CRH,CRHR1,TMEM33,CORO1A,SHANK2,SNTA1
GO: Biological Process	GO:0021761	limbic system development		2.053E-8	1.096E-4	1.636E-6	1.498E-5	16	179	KDM6B,PTEN,WNT3A,PPP1R9B,FGF13,TENT2,XRN2,DRD2,AKAP5,POU3F2,GRIN2B,CRH,CRHR1,NKX2-4,NCOA1,TBR1
GO: Biological Process	GO:0099003	vesicle-mediated transport in synapse		2.092E-8	1.116E-4	1.642E-6	1.504E-5	20	284	SYT9,PTEN,STXBP1,NRXN1,WNT3A,SYT4,SYT5,NR3C2,DRD2,AKAP5,CALM2,CALM3,APBA1,GRIK5,NLGN1,SYT2,SYT7,CADPS,GRIP2,CTNNB1
GO: Biological Process	GO:0032412	regulation of ion transmembrane transporter activity		2.393E-8	1.278E-4	1.842E-6	1.687E-5	21	315	PTEN,NRXN1,SCN4B,FGF13,TESC,SHANK1,DRD2,ANK2,ANK3,CALM2,CALM3,GRIA2,GRIA3,NLGN1,GRIN2B,COA8,SHANK3,CRH,CRHR1,TMEM33,SHANK2
GO: Biological Process	GO:0023061	signal release		2.415E-8	1.289E-4	1.842E-6	1.687E-5	32	678	SOX11,KDM5B,SYT9,BLK,CAMK2N1,STXBP1,NRXN1,UCN,SYT4,SYT5,NR3C2,SMPD3,SYT13,CACNA1E,DRD2,TCF7L2,UBE2Q1,CALM2,CALM3,APBA1,PORCN,GRIK5,NLGN1,SYT2,RFX3,SYT7,CRH,CRHR1,CCKAR,CCKBR,CADPS,UCN3
GO: Biological Process	GO:2000113	negative regulation of cellular macromolecule biosynthetic process		2.499E-8	1.334E-4	1.879E-6	1.721E-5	60	1844	MYT1L,SOX11,KDM5B,CELF4,HDAC4,IRF2BP1,TSPYL2,ZMYND8,BCL11A,FOXN3,NR6A1,FOXA1,PHF21A,BAP1,FZD1,PHF2,SOX7,LDB1,SATB1,PINX1,SPDEF,IRF2BPL,MMP12,TBL1X,DNMT3A,NRIP2,TRAF7,TCF4,TCF7L2,PCBP3,DEAF1,FOXP2,KDM5A,NACC1,PHF12,WNT5A,NSD1,CHD8,SIN3A,SKI,RFX3,TBL1XR1,CREBBP,NCOA5,FOXP4,ASCL2,MKX,SMARCC2,FOXP1,PHF14,RORB,ASXL2,PAX3,VGLL4,PAX5,CTNNB1,TBR1,PUM1,OLIG2,H3C14
GO: Biological Process	GO:0015837	amine transport		2.666E-8	1.423E-4	1.977E-6	1.811E-5	14	136	NAT8L,SYT9,STXBP1,SYT4,SYT5,SYT13,DPYSL2,DRD2,GRIN2B,SYT2,SYT7,CRH,CRHR1,SLC6A1
GO: Biological Process	GO:0099565	chemical synaptic transmission, postsynaptic		2.929E-8	1.564E-4	2.142E-6	1.962E-5	14	137	GABRB3,CELF4,ZMYND8,PTEN,NRXN1,SHANK1,DRD2,GRIA2,GRIK5,NLGN1,GRIN2B,SHANK3,SHANK2,GRIP2
GO: Biological Process	GO:0045944	positive regulation of transcription by RNA polymerase II		2.994E-8	1.598E-4	2.148E-6	1.967E-5	50	1407	MYT1L,SOX11,HDAC4,VEZF1,ASH1L,IRF6,PAGR1,POGZ,NR6A1,KDM6B,FOXA1,HNF4G,ARNTL2,KMT2C,LDB1,UCN,WNT3A,SPDEF,IRF2BPL,NKX2-2,SLC30A9,MMP12,TBL1X,TCF4,DRD2,TCF7L2,DEAF1,TCF20,WNT5A,POU3F2,CHD8,SIN3A,SKI,CREB3L4,RFX3,TBL1XR1,RFX4,CREBBP,PPP2R5D,ASCL2,ASXL3,MKX,NCOA1,FOXP1,RORB,ASXL2,PAX3,PAX5,CTNNB1,TBR1
GO: Biological Process	GO:0050805	negative regulation of synaptic transmission		3.018E-8	1.611E-4	2.148E-6	1.967E-5	12	96	CELF4,MAPT,PTEN,STXBP1,SYT4,GNAI1,DRD2,ADNP,SHANK3,SLC6A1,SHANK2,KCNQ4
GO: Biological Process	GO:0061564	axon development		3.112E-8	1.661E-4	2.186E-6	2.002E-5	35	797	CHL1,SPAST,MAP1A,MAP6,MAPT,BCL11A,PTEN,SYNGAP1,S100B,NTNG2,STXBP1,NRXN1,WNT3A,FGF13,NKX2-2,VLDLR,DPYSL2,DPYSL3,DRD2,ANK3,DSCAM,WNT3,WNT5A,NTNG1,POU3F2,LRRC4B,SIN3A,LRRC4C,ADNP,SHANK3,CCKAR,CORO1A,FOXP1,TRAK2,TBR1
GO: Biological Process	GO:0051937	catecholamine transport		3.396E-8	1.813E-4	2.355E-6	2.157E-5	12	97	NAT8L,SYT9,SYT4,SYT5,SMPD3,SYT13,DRD2,SYT2,SYT7,CRH,CRHR1,CADPS
GO: Biological Process	GO:1905114	cell surface receptor signaling pathway involved in cell-cell signaling		3.967E-8	2.118E-4	2.715E-6	2.487E-5	34	767	GABRB3,CELF4,MARK1,ZMYND8,PTEN,PTK7,FZD1,WNT5B,FZD7,SOX7,AP2S1,LDB1,NRXN1,SULF1,WNT3A,TBL1X,SHANK1,DRD2,TCF7L2,WNT3,WNT5A,PORCN,GRIA2,CHD8,GRIK5,NLGN1,GRIN2B,SKI,TBL1XR1,SHANK3,SHANK2,GRIP2,VGLL4,CTNNB1
GO: Biological Process	GO:0022898	regulation of transmembrane transporter activity		4.553E-8	2.431E-4	3.050E-6	2.794E-5	21	327	PTEN,NRXN1,SCN4B,FGF13,TESC,SHANK1,DRD2,ANK2,ANK3,CALM2,CALM3,GRIA2,GRIA3,NLGN1,GRIN2B,COA8,SHANK3,CRH,CRHR1,TMEM33,SHANK2
GO: Biological Process	GO:0000902	cell morphogenesis		4.571E-8	2.440E-4	3.050E-6	2.794E-5	50	1426	CHL1,SPAST,MAP1A,MAP6,MAPT,BCL11A,PTEN,SYNGAP1,WNT5B,FZD7,S100B,DIP2A,NTNG2,STXBP1,ABITRAM,NRXN1,WNT3A,SYT4,TAOK1,FGF13,NKX2-2,SHANK1,WHRN,VLDLR,DPYSL2,DPYSL3,DRD2,AKAP5,ANK3,DSCAM,WNT3,WNT5A,NTNG1,POU3F2,LRRC4B,SIN3A,NLGN1,SYT2,LRRC4C,TEK,ADNP,SHANK3,CCKAR,CORO1A,SHANK2,FOXP1,TRAK2,CTNNB1,TBR1,MYO16
GO: Biological Process	GO:2001257	regulation of cation channel activity		5.611E-8	2.995E-4	3.698E-6	3.387E-5	17	218	NRXN1,FGF13,SHANK1,DRD2,ANK2,ANK3,CALM2,CALM3,GRIA2,GRIA3,NLGN1,GRIN2B,SHANK3,CRH,CRHR1,TMEM33,SHANK2
GO: Biological Process	GO:0005513	detection of calcium ion		5.848E-8	3.122E-4	3.807E-6	3.487E-5	6	15	KCNMB2,SYT9,KCNMB1,CALM2,CALM3,SYT7
GO: Biological Process	GO:0010035	response to inorganic substance		7.426E-8	3.964E-4	4.776E-6	4.375E-5	37	904	GABRB3,KCNMB2,MAPT,SYT9,HMGCS1,KDM6B,PTEN,BAP1,NRXN1,KCNMA1,KCNMB1,KCNQ3,SYT4,SYT5,CACNA1H,SMPD3,SPAG16,SYT13,DNMT3A,DRD2,TCF7L2,ANK3,CALM2,CALM3,WNT5A,GRIA2,GRIA3,NLGN1,GRIN2B,SYT2,ADNP,SYT7,SLC6A1,PPP5C,FOXP1,ELN,CTNNB1
GO: Biological Process	GO:0050877	nervous system process		7.888E-8	4.210E-4	5.012E-6	4.591E-5	59	1858	CHL1,GABRB2,GABRB3,KCNMB2,DLGAP2,DLGAP1,CELF4,MAP1A,MAPT,ZMYND8,PTEN,TULP1,PTK7,SYNGAP1,S100B,DLGAP3,AP2S1,NRXN1,SCN1A,UCN,SCN2A,KCNMA1,KCNQ2,SYT4,PPP1R9B,CACNA1H,FGF13,SPAG16,TBL1X,SHANK1,WHRN,CACNA1E,VLDLR,DRD2,DEAF1,ANK3,FOXP2,DLGAP4,KERA,GRIA2,POU3F4,CHD8,GRIK5,NLGN1,GRIN2B,ADNP,SHANK3,CRH,CRHR1,CCKBR,SLC6A1,SHANK2,SETD5,KCNQ4,RORB,PAX3,GRIP2,TBR1,GABRA6
GO: Biological Process	GO:0060079	excitatory postsynaptic potential		9.008E-8	4.808E-4	5.657E-6	5.182E-5	13	127	CELF4,ZMYND8,PTEN,NRXN1,SHANK1,DRD2,GRIA2,GRIK5,NLGN1,GRIN2B,SHANK3,SHANK2,GRIP2
GO: Biological Process	GO:1903305	regulation of regulated secretory pathway		9.480E-8	5.060E-4	5.884E-6	5.390E-5	17	226	SYT9,BLK,STXBP1,SYT4,SYT5,CACNA1H,NR3C2,SYT13,DRD2,CALM2,CALM3,APBA1,NLGN1,SYT2,SYT7,CRHR1,CADPS
GO: Biological Process	GO:0051050	positive regulation of transport		9.907E-8	5.289E-4	6.079E-6	5.568E-5	43	1160	SOX11,NAT8L,TM9SF4,SYTL2,SYT9,TULP1,BAP1,BLK,CAMK2N1,STXBP1,UCN,WNT3A,SCN4B,KCNMB1,SYT4,CACNA1H,TESC,SMPD3,DYNC1H1,DPYSL2,DRD2,TCF7L2,AKAP5,ANGPT1,ANK2,ANK3,CALM2,CALM3,WNT5A,NLGN1,GRIN2B,SYT2,TEK,SYT7,COA8,SHANK3,CRH,CRHR1,CCKAR,CCKBR,SLC6A1,CADPS,UCN3
GO: Biological Process	GO:0032409	regulation of transporter activity		1.025E-7	5.469E-4	6.215E-6	5.693E-5	21	343	PTEN,NRXN1,SCN4B,FGF13,TESC,SHANK1,DRD2,ANK2,ANK3,CALM2,CALM3,GRIA2,GRIA3,NLGN1,GRIN2B,COA8,SHANK3,CRH,CRHR1,TMEM33,SHANK2
GO: Biological Process	GO:0099504	synaptic vesicle cycle		1.040E-7	5.550E-4	6.236E-6	5.712E-5	18	255	SYT9,PTEN,STXBP1,NRXN1,WNT3A,SYT4,SYT5,NR3C2,DRD2,CALM2,CALM3,APBA1,GRIK5,NLGN1,SYT2,SYT7,CADPS,CTNNB1
GO: Biological Process	GO:0017158	regulation of calcium ion-dependent exocytosis		1.113E-7	5.940E-4	6.600E-6	6.045E-5	9	53	SYT9,STXBP1,SYT4,SYT5,CACNA1H,SYT13,SYT2,SYT7,CADPS
GO: Biological Process	GO:0099173	postsynapse organization		1.147E-7	6.123E-4	6.729E-6	6.163E-5	17	229	DLGAP1,ZMYND8,PTEN,LRRC4,SYNGAP1,DIP2A,NTNG2,NRXN1,SHANK1,WNT5A,LRRC4B,CNKSR2,NLGN1,GRIN2B,SHANK3,SHANK2,GRIP2
GO: Biological Process	GO:0006836	neurotransmitter transport		1.560E-7	8.329E-4	9.053E-6	8.293E-5	19	291	NAT8L,SYT9,GFAP,STXBP1,NRXN1,SYT4,SYT5,NR3C2,DRD2,CALM2,CALM3,APBA1,GRIK5,NLGN1,SYT2,SYT7,SLC6A1,CADPS,TRAK2
GO: Biological Process	GO:0016079	synaptic vesicle exocytosis		1.771E-7	9.452E-4	1.016E-5	9.310E-5	14	158	SYT9,STXBP1,SYT4,SYT5,NR3C2,DRD2,CALM2,CALM3,APBA1,GRIK5,NLGN1,SYT2,SYT7,CADPS
GO: Biological Process	GO:0031327	negative regulation of cellular biosynthetic process		1.829E-7	9.762E-4	1.039E-5	9.513E-5	60	1951	MYT1L,SOX11,KDM5B,CELF4,HDAC4,IRF2BP1,TSPYL2,ZMYND8,BCL11A,FOXN3,NR6A1,FOXA1,PHF21A,BAP1,FZD1,PHF2,SOX7,LDB1,SATB1,PINX1,SPDEF,IRF2BPL,MMP12,TBL1X,DNMT3A,NRIP2,TRAF7,TCF4,TCF7L2,PCBP3,DEAF1,FOXP2,KDM5A,NACC1,PHF12,WNT5A,NSD1,CHD8,SIN3A,SKI,RFX3,TBL1XR1,CREBBP,NCOA5,FOXP4,ASCL2,MKX,SMARCC2,FOXP1,PHF14,RORB,ASXL2,PAX3,VGLL4,PAX5,CTNNB1,TBR1,PUM1,OLIG2,H3C14
GO: Biological Process	GO:0051046	regulation of secretion		2.025E-7	1.081E-3	1.130E-5	1.035E-4	35	861	SOX11,KDM5B,SYTL2,SYT9,BLK,CAMK2N1,STXBP1,NRXN1,UCN,SYT4,SYT5,CACNA1H,NR3C2,SMPD3,SYT13,CACNA1E,DPYSL2,DRD2,TCF7L2,CALM2,CALM3,APBA1,NLGN1,GRIN2B,SYT2,ADTRP,RFX3,SYT7,CRH,CRHR1,CCKAR,CCKBR,SLC6A1,CADPS,UCN3
GO: Biological Process	GO:0050803	regulation of synapse structure or activity		2.032E-7	1.085E-3	1.130E-5	1.035E-4	19	296	ZMYND8,ADGRB2,PTEN,SYNGAP1,FZD1,NTNG2,NRXN1,NEGR1,WNT3A,ADGRL2,DRD2,WNT5A,LRRC4B,NLGN1,GRIN2B,ADNP,SHANK3,SHANK2,SETD5
GO: Biological Process	GO:0015844	monoamine transport		2.081E-7	1.111E-3	1.145E-5	1.049E-4	12	114	NAT8L,SYT9,SYT4,SYT5,SMPD3,SYT13,DRD2,SYT2,SYT7,CRH,CRHR1,CADPS
GO: Biological Process	GO:0021543	pallium development		2.248E-7	1.200E-3	1.225E-5	1.122E-4	17	240	KDM6B,PTEN,EFHC1,WNT3A,PPP1R9B,FGF13,TENT2,VLDLR,XRN2,AKAP5,FOXP2,POU3F2,GRIN2B,NCOA1,PAX5,CTNNB1,TBR1
GO: Biological Process	GO:0051047	positive regulation of secretion		2.414E-7	1.289E-3	1.302E-5	1.192E-4	23	426	SOX11,SYTL2,SYT9,BLK,CAMK2N1,STXBP1,UCN,SYT4,CACNA1H,SMPD3,DPYSL2,DRD2,TCF7L2,NLGN1,GRIN2B,SYT7,CRH,CRHR1,CCKAR,CCKBR,SLC6A1,CADPS,UCN3
GO: Biological Process	GO:0071248	cellular response to metal ion		2.581E-7	1.378E-3	1.378E-5	1.262E-4	18	271	GABRB3,SYT9,NRXN1,SYT4,SYT5,CACNA1H,SMPD3,SPAG16,SYT13,ANK3,WNT5A,NLGN1,GRIN2B,SYT2,SYT7,PPP5C,ELN,CTNNB1
GO: Biological Process	GO:1903530	regulation of secretion by cell		2.730E-7	1.457E-3	1.443E-5	1.322E-4	33	793	SOX11,KDM5B,SYT9,BLK,CAMK2N1,STXBP1,NRXN1,UCN,SYT4,SYT5,CACNA1H,NR3C2,SMPD3,SYT13,CACNA1E,DPYSL2,DRD2,TCF7L2,CALM2,CALM3,APBA1,NLGN1,GRIN2B,SYT2,ADTRP,RFX3,SYT7,CRH,CRHR1,CCKAR,CCKBR,CADPS,UCN3
GO: Biological Process	GO:0048014	Tie signaling pathway		2.786E-7	1.487E-3	1.458E-5	1.335E-4	4	5	ANGPT4,ANGPT1,ANGPT2,TEK
GO: Biological Process	GO:0016358	dendrite development		3.255E-7	1.737E-3	1.687E-5	1.545E-4	20	336	MAP1A,MAP6,MARK1,ZMYND8,BCL11A,PTEN,TULP1,SYNGAP1,DIP2A,ARID1B,ABITRAM,PPP1R9B,SHANK1,VLDLR,AKAP5,DSCAM,NLGN1,SHANK3,SHANK2,TRAK2
GO: Biological Process	GO:0008306	associative learning		3.337E-7	1.781E-3	1.713E-5	1.569E-4	12	119	MAP1A,SYNGAP1,UCN,SHANK1,CACNA1E,DRD2,DEAF1,GRIN2B,CRH,CRHR1,SLC6A1,TBR1
GO: Biological Process	GO:0098815	modulation of excitatory postsynaptic potential		3.375E-7	1.802E-3	1.716E-5	1.572E-4	9	60	CELF4,ZMYND8,PTEN,NRXN1,SHANK1,NLGN1,SHANK3,SHANK2,GRIP2
GO: Biological Process	GO:0015872	dopamine transport		3.906E-7	2.085E-3	1.967E-5	1.802E-4	9	61	NAT8L,SYT9,SYT4,SYT5,SMPD3,SYT13,DRD2,SYT2,SYT7
GO: Biological Process	GO:0050770	regulation of axonogenesis		4.055E-7	2.164E-3	2.023E-5	1.853E-4	16	222	SPAST,MAP6,MAPT,BCL11A,PTEN,SYNGAP1,WNT3A,FGF13,DSCAM,WNT3,WNT5A,POU3F2,LRRC4B,LRRC4C,ADNP,TRAK2
GO: Biological Process	GO:0021953	central nervous system neuron differentiation		4.133E-7	2.206E-3	2.043E-5	1.871E-4	19	310	SPAST,MAPT,PTEN,FZD1,LDB1,NRXN1,WNT3A,NKX2-2,DRD2,WNT3,WNT5A,POU3F4,SIN3A,SHANK3,CORO1A,PAX3,CTNNB1,TBR1,OLIG2
GO: Biological Process	GO:0050432	catecholamine secretion		4.342E-7	2.318E-3	2.126E-5	1.948E-4	10	80	SYT9,SYT4,SYT5,SYT13,DRD2,SYT2,SYT7,CRH,CRHR1,CADPS
GO: Biological Process	GO:0050807	regulation of synapse organization		4.402E-7	2.350E-3	2.136E-5	1.957E-4	18	281	ZMYND8,ADGRB2,PTEN,FZD1,NTNG2,NRXN1,NEGR1,WNT3A,ADGRL2,DRD2,WNT5A,LRRC4B,NLGN1,GRIN2B,ADNP,SHANK3,SHANK2,SETD5
GO: Biological Process	GO:0031338	regulation of vesicle fusion		4.820E-7	2.573E-3	2.318E-5	2.123E-4	7	32	SYT9,STXBP1,SYT4,GRIK5,SYT2,SYT7,CORO1A
GO: Biological Process	GO:0086001	cardiac muscle cell action potential		4.886E-7	2.608E-3	2.329E-5	2.133E-4	10	81	SCN1A,SCN4B,KCNN2,FGF13,ANK2,ANK3,CALM2,CALM3,NUP155,SNTA1
GO: Biological Process	GO:0098655	cation transmembrane transport		5.722E-7	3.055E-3	2.703E-5	2.476E-4	40	1108	KCNMB2,PTEN,WNT5B,KCNQ5,NRXN1,SCN1A,WNT3A,SCN2A,SCN4B,KCNMA1,KCNMB1,KCNN2,KCNQ2,KCNQ3,CACNA1H,FGF13,TESC,SLC30A9,SHANK1,CACNA1E,DRD2,ANK2,ANK3,CALM2,CALM3,GRIA2,GRIA3,NLGN1,GRIN2B,COA8,SHANK3,CRH,CRHR1,TMEM33,SLC6A1,CORO1A,SHANK2,KCNQ4,SNTA1,CACNA2D3
GO: Biological Process	GO:0050767	regulation of neurogenesis		5.861E-7	3.129E-3	2.744E-5	2.514E-4	25	518	SOX11,SPAST,MAP6,MAPT,BCL11A,PTEN,GFAP,SYNGAP1,WNT3A,SYT4,FGF13,NKX2-2,DRD2,AKAP5,DSCAM,WNT3,WNT5A,SKI,ADNP,SHANK3,ASCL2,ELAVL3,TRAK2,CTNNB1,OLIG2
GO: Biological Process	GO:0051932	synaptic transmission, GABAergic		5.956E-7	3.179E-3	2.765E-5	2.533E-4	9	64	GABRB2,GABRB3,PTEN,STXBP1,DRD2,NLGN1,CCKBR,SLC6A1,GABRA6
GO: Biological Process	GO:0006338	chromatin remodeling		7.316E-7	3.905E-3	3.367E-5	3.084E-4	16	232	KDM5B,HDAC4,ASH1L,KDM6B,FOXA1,NPM3,PHF2,ARID1B,SATB1,DNMT3A,KDM5A,CENPO,CHD8,GATAD1,SMARCC2,H3C14
GO: Biological Process	GO:0051966	regulation of synaptic transmission, glutamatergic		7.707E-7	4.114E-3	3.498E-5	3.204E-4	10	85	STXBP1,NRXN1,UCN,SHANK1,DRD2,GRIA2,NLGN1,SHANK3,CCKBR,SHANK2
GO: Biological Process	GO:0031644	regulation of nervous system process		7.732E-7	4.127E-3	3.498E-5	3.204E-4	15	205	DLGAP2,DLGAP1,CELF4,ZMYND8,PTEN,S100B,DLGAP3,NRXN1,SHANK1,DLGAP4,NLGN1,SHANK3,CCKBR,SHANK2,GRIP2
GO: Biological Process	GO:0045956	positive regulation of calcium ion-dependent exocytosis		7.956E-7	4.247E-3	3.539E-5	3.242E-4	6	22	SYT9,STXBP1,SYT4,CACNA1H,SYT7,CADPS
GO: Biological Process	GO:0097107	postsynaptic density assembly		7.956E-7	4.247E-3	3.539E-5	3.242E-4	6	22	PTEN,NRXN1,SHANK1,LRRC4B,SHANK3,SHANK2
GO: Biological Process	GO:1903532	positive regulation of secretion by cell		8.510E-7	4.543E-3	3.754E-5	3.439E-4	21	390	SOX11,SYT9,BLK,CAMK2N1,STXBP1,UCN,SYT4,CACNA1H,SMPD3,DPYSL2,DRD2,TCF7L2,NLGN1,GRIN2B,SYT7,CRH,CRHR1,CCKAR,CCKBR,CADPS,UCN3
GO: Biological Process	GO:0051963	regulation of synapse assembly		8.710E-7	4.650E-3	3.811E-5	3.491E-4	12	130	ADGRB2,FZD1,NTNG2,NRXN1,NEGR1,WNT3A,ADGRL2,WNT5A,LRRC4B,NLGN1,ADNP,SETD5
GO: Biological Process	GO:0051129	negative regulation of cellular component organization		8.813E-7	4.704E-3	3.825E-5	3.503E-4	35	917	MAP1A,MAPT,BCL11A,PTEN,TRIP12,GFAP,ADD2,SYNGAP1,PHF2,STXBP1,NRXN1,NTM,UCN,WNT3A,PINX1,SYT4,TAOK1,FGF13,SHANK1,DPYSL3,KDM5A,WNT3,WNT5A,BAG5,DYRK1A,SIN3A,NLGN1,GRIN2B,XRCC3,ADTRP,SKI,SHANK3,CORO1A,PAX5,TRAK2
GO: Biological Process	GO:0099560	synaptic membrane adhesion		9.254E-7	4.940E-3	3.984E-5	3.649E-4	7	35	LRRC4,NTNG2,NRXN1,NTNG1,LRRC4B,NLGN1,LRRC4C
GO: Biological Process	GO:0031630	regulation of synaptic vesicle fusion to presynaptic active zone membrane		1.002E-6	5.350E-3	4.246E-5	3.889E-4	5	13	SYT9,STXBP1,GRIK5,SYT2,SYT7
GO: Biological Process	GO:1904953	Wnt signaling pathway involved in midbrain dopaminergic neuron differentiation		1.002E-6	5.350E-3	4.246E-5	3.889E-4	5	13	FZD1,WNT3A,WNT3,WNT5A,CTNNB1
GO: Biological Process	GO:0017157	regulation of exocytosis		1.033E-6	5.512E-3	4.341E-5	3.976E-4	18	298	SYT9,BLK,STXBP1,SYT4,SYT5,CACNA1H,NR3C2,SMPD3,SYT13,DRD2,CALM2,CALM3,APBA1,NLGN1,SYT2,SYT7,CRHR1,CADPS
GO: Biological Process	GO:0071625	vocalization behavior		1.062E-6	5.671E-3	4.396E-5	4.027E-4	6	23	NRXN1,SHANK1,FOXP2,SHANK3,SHANK2,FOXP1
GO: Biological Process	GO:0048791	calcium ion-regulated exocytosis of neurotransmitter		1.062E-6	5.671E-3	4.396E-5	4.027E-4	6	23	STXBP1,SYT4,SYT5,SYT2,SYT7,CADPS
GO: Biological Process	GO:0035637	multicellular organismal signaling		1.146E-6	6.120E-3	4.707E-5	4.312E-4	16	240	KCNMB2,SCN1A,SCN2A,SCN4B,KCNMA1,KCNN2,KCNQ2,CACNA1H,CACNA1E,ANK2,ANK3,CALM2,CALM3,SKI,NUP155,CACNA2D3
GO: Biological Process	GO:0001505	regulation of neurotransmitter levels		1.311E-6	6.998E-3	5.342E-5	4.893E-4	18	303	NAT8L,SYT9,GFAP,STXBP1,NRXN1,SYT4,SYT5,NR3C2,DRD2,CALM2,CALM3,APBA1,GRIK5,NLGN1,SYT2,SYT7,SLC6A1,CADPS
GO: Biological Process	GO:0007626	locomotory behavior		1.329E-6	7.092E-3	5.373E-5	4.921E-4	19	335	CHL1,MAPT,POGZ,PTEN,SYNGAP1,QRFPR,NEGR1,SCN1A,KCNMA1,CACNA1E,DRD2,DSCAM,APBA1,SHANK3,CRH,CRHR1,SETD5,LSAMP,PUM1
GO: Biological Process	GO:0035640	exploration behavior		1.380E-6	7.365E-3	5.538E-5	5.072E-4	7	37	CHL1,GABRB3,SHANK3,CRH,CRHR1,SHANK2,LSAMP
GO: Biological Process	GO:0051962	positive regulation of nervous system development		1.439E-6	7.680E-3	5.731E-5	5.250E-4	21	403	SOX11,SPAST,MAP6,MAPT,ADGRB2,BCL11A,GFAP,NRXN1,WNT3A,NKX2-2,ADGRL2,DRD2,AKAP5,DSCAM,WNT3,LRRC4B,NLGN1,ADNP,SHANK3,CTNNB1,OLIG2
GO: Biological Process	GO:0051968	positive regulation of synaptic transmission, glutamatergic		1.669E-6	8.909E-3	6.599E-5	6.045E-4	7	38	STXBP1,NRXN1,SHANK1,NLGN1,SHANK3,CCKBR,SHANK2
GO: Biological Process	GO:0009725	response to hormone		1.796E-6	9.589E-3	7.050E-5	6.458E-4	45	1382	HDAC4,HMGCS1,PAGR1,SSTR2,PTEN,FOXA1,FZD1,S100B,ARID1B,SERPINB9,UCN,KCNMA1,PPP1R9B,CACNA1H,NR3C2,GNAI1,NKX2-2,TBL1X,VLDLR,ANGPT1,CALM2,CALM3,WNT5A,GRIN2B,CAV2,ADTRP,TEK,CRH,CRHR1,CCKAR,CCKBR,TFPI,NCOA5,LHB,PPP5C,NCOA1,FOXP1,RORB,UCN3,ELN,CTNNB1,MBD5,MUC2,CACNA2D3,HDLBP
GO: Biological Process	GO:2000026	regulation of multicellular organismal development		1.817E-6	9.700E-3	7.079E-5	6.484E-4	55	1848	SOX11,SPAST,VEZF1,MAP6,MAPT,ADGRB2,BCL11A,KMT2E,PTEN,TRIP12,GFAP,SYNGAP1,KMT2C,S100B,LDB1,NRXN1,SULF1,ANGPT4,WNT3A,SYT4,FGF13,NKX2-2,TESC,SMPD3,ADGRL2,TCF4,DRD2,TCF7L2,AKAP5,ANGPT2,DSCAM,WNT3,WNT5A,LRRC4B,SIN3A,NLGN1,SKI,TEK,ADNP,NFAM1,RFX3,CREBBP,SHANK3,TMEM33,FOXP4,ASCL2,LPA,ELAVL3,FOXP1,ASXL2,VGLL4,TRAK2,CTNNB1,OLIG2,H3C14
GO: Biological Process	GO:0070997	neuron death		1.830E-6	9.769E-3	7.079E-5	6.484E-4	24	515	CHL1,GABRB2,GABRB3,HDAC4,MAPT,SRPK2,SYNGAP1,FZD1,STXBP1,TMEM259,UCN,WNT3A,SCN2A,KCNMA1,ANGPT1,WNT5A,BAG5,GRIK5,GRIN2B,ADNP,CRHR1,CORO1A,PPP5C,CTNNB1
GO: Biological Process	GO:0016571	histone methylation		1.860E-6	9.927E-3	7.142E-5	6.542E-4	13	165	ASH1L,PAGR1,KMT2E,KMT2C,SATB1,DPPA2,NSD1,CREBBP,KMT5B,SETD5,ASXL2,PAX5,CTNNB1
GO: Biological Process	GO:0035249	synaptic transmission, glutamatergic		2.083E-6	1.112E-2	7.940E-5	7.273E-4	11	117	STXBP1,NRXN1,UCN,SHANK1,DRD2,GRIA2,GRIK5,NLGN1,SHANK3,CCKBR,SHANK2
GO: Biological Process	GO:2000463	positive regulation of excitatory postsynaptic potential		2.401E-6	1.282E-2	9.090E-5	8.326E-4	7	40	PTEN,NRXN1,SHANK1,NLGN1,SHANK3,SHANK2,GRIP2
GO: Biological Process	GO:0060048	cardiac muscle contraction		2.431E-6	1.298E-2	9.139E-5	8.371E-4	13	169	HDAC4,SCN1A,UCN,SCN4B,KCNN2,CACNA1H,FGF13,ANK2,CALM2,CALM3,NUP155,TNNI2,SNTA1
GO: Biological Process	GO:0022603	regulation of anatomical structure morphogenesis		2.759E-6	1.473E-2	1.030E-4	9.434E-4	43	1314	SOX11,SPAST,HDAC4,MAP6,MAPT,ADGRB2,BCL11A,PTEN,PTK7,SYNGAP1,FZD1,WNT5B,FZD7,S100B,NTNG2,AP2S1,SULF1,ANGPT4,WNT3A,SYT4,FGF13,TCF4,AKAP5,ANGPT2,DSCAM,WNT3,WNT5A,NTNG1,POU3F2,LRRC4B,NLGN1,SYT2,LRRC4C,TEK,ADNP,SHANK3,TMEM33,CORO1A,LPA,FOXP1,PAX3,TRAK2,CTNNB1
GO: Biological Process	GO:0071277	cellular response to calcium ion		2.889E-6	1.542E-2	1.071E-4	9.809E-4	10	98	SYT9,NRXN1,SYT4,SYT5,SPAG16,SYT13,WNT5A,NLGN1,SYT2,SYT7
GO: Biological Process	GO:0050433	regulation of catecholamine secretion		2.925E-6	1.562E-2	1.077E-4	9.865E-4	9	77	SYT9,SYT4,SYT5,SYT13,DRD2,SYT2,SYT7,CRH,CRHR1
GO: Biological Process	GO:0018205	peptidyl-lysine modification		3.168E-6	1.691E-2	1.158E-4	1.061E-3	22	459	HDAC4,ASH1L,PAGR1,BCL11A,KMT2E,KMT2C,DIP2A,LDB1,TRAF7,NSD1,SIN3A,NAA50,CREBBP,KANSL1,NUP155,KMT5B,SETD5,NCOA1,PHF14,ASXL2,PAX5,CTNNB1
GO: Biological Process	GO:0071542	dopaminergic neuron differentiation		3.377E-6	1.802E-2	1.226E-4	1.123E-3	8	59	FOXA1,FZD1,WNT3A,WNT3,WNT5A,PAX5,CTNNB1,OLIG2
GO: Biological Process	GO:1901214	regulation of neuron death		3.518E-6	1.878E-2	1.269E-4	1.162E-3	22	462	CHL1,GABRB2,GABRB3,HDAC4,MAPT,SRPK2,SYNGAP1,FZD1,STXBP1,TMEM259,UCN,WNT3A,KCNMA1,ANGPT1,WNT5A,GRIK5,GRIN2B,ADNP,CRHR1,CORO1A,PPP5C,CTNNB1
GO: Biological Process	GO:0044338	canonical Wnt signaling pathway involved in mesenchymal stem cell differentiation		3.735E-6	1.994E-2	1.338E-4	1.226E-3	3	3	FZD1,WNT3,CTNNB1
GO: Biological Process	GO:0099054	presynapse assembly		3.844E-6	2.052E-2	1.368E-4	1.253E-3	8	60	PTEN,FZD1,NTNG2,NRXN1,WNT3A,WNT5A,LRRC4B,NLGN1
GO: Biological Process	GO:0099643	signal release from synapse		4.020E-6	2.146E-2	1.409E-4	1.290E-3	15	234	SYT9,STXBP1,NRXN1,SYT4,SYT5,NR3C2,DRD2,CALM2,CALM3,APBA1,GRIK5,NLGN1,SYT2,SYT7,CADPS
GO: Biological Process	GO:0007269	neurotransmitter secretion		4.020E-6	2.146E-2	1.409E-4	1.290E-3	15	234	SYT9,STXBP1,NRXN1,SYT4,SYT5,NR3C2,DRD2,CALM2,CALM3,APBA1,GRIK5,NLGN1,SYT2,SYT7,CADPS
GO: Biological Process	GO:0017156	calcium-ion regulated exocytosis		4.038E-6	2.155E-2	1.409E-4	1.290E-3	9	80	SYT9,STXBP1,SYT4,SYT5,CACNA1H,SYT13,SYT2,SYT7,CADPS
GO: Biological Process	GO:0048511	rhythmic process		4.437E-6	2.369E-2	1.535E-4	1.406E-3	21	433	GABRB3,KDM5B,PTEN,ARNTL2,NRXN1,SCN1A,KCNMA1,DRD2,KDM5A,WNT5A,DYRK1A,SIN3A,NLGN1,GRIN2B,ADNP,CREBBP,CRH,CCKBR,NCOA1,RORB,RAI1
GO: Biological Process	GO:1901888	regulation of cell junction assembly		4.460E-6	2.381E-2	1.535E-4	1.406E-3	15	236	ADGRB2,PTEN,FZD1,NTNG2,LDB1,NRXN1,NEGR1,WNT3A,ADGRL2,WNT5A,LRRC4B,NLGN1,TEK,ADNP,SETD5
GO: Biological Process	GO:0060284	regulation of cell development		4.486E-6	2.395E-2	1.535E-4	1.406E-3	28	697	SOX11,SPAST,HDAC4,MAP6,MAPT,BCL11A,PTEN,GFAP,SYNGAP1,WNT3A,SYT4,FGF13,NKX2-2,DRD2,AKAP5,DSCAM,WNT3,WNT5A,SKI,ADNP,RFX3,SHANK3,ASCL2,ELAVL3,GRIP2,TRAK2,CTNNB1,OLIG2
GO: Biological Process	GO:0042596	fear response		4.945E-6	2.640E-2	1.681E-4	1.540E-3	8	62	UCN,CACNA1E,DEAF1,GRIN2B,SHANK3,CRH,CRHR1,CCKBR
GO: Biological Process	GO:0021510	spinal cord development		5.189E-6	2.770E-2	1.753E-4	1.606E-3	13	181	SOX11,POGZ,SULF1,WNT3A,NKX2-2,VLDLR,DPYSL2,AKAP5,PTBP2,RFX4,FOXP1,PAX3,OLIG2
GO: Biological Process	GO:0014059	regulation of dopamine secretion		5.469E-6	2.920E-2	1.825E-4	1.671E-3	7	45	SYT9,SYT4,SYT5,SYT13,DRD2,SYT2,SYT7
GO: Biological Process	GO:0014046	dopamine secretion		5.469E-6	2.920E-2	1.825E-4	1.671E-3	7	45	SYT9,SYT4,SYT5,SYT13,DRD2,SYT2,SYT7
GO: Biological Process	GO:0048638	regulation of developmental growth		5.665E-6	3.024E-2	1.878E-4	1.720E-3	22	476	SPAST,MAPT,BCL11A,PTEN,WNT3A,SYT4,FGF13,DPYSL2,DRD2,TCF7L2,DSCAM,WNT3,WNT5A,POU3F2,SIN3A,SYT2,ADNP,KMT5B,FOXP1,VGLL4,MBD5,RAI1
GO: Biological Process	GO:0050795	regulation of behavior		5.837E-6	3.116E-2	1.923E-4	1.762E-3	11	130	HDAC4,NRXN1,SCN1A,UCN,DRD2,NLGN1,SHANK3,CRH,CRHR1,CCKBR,MBD5
GO: Biological Process	GO:0060627	regulation of vesicle-mediated transport		6.176E-6	3.297E-2	2.023E-4	1.853E-3	28	709	SYT9,PTEN,TULP1,BLK,AP2S1,STXBP1,NRXN1,WNT3A,SYT4,SYT5,CACNA1H,NR3C2,SMPD3,SYT13,DRD2,AKAP5,ANGPT1,CALM2,CALM3,WNT5A,APBA1,GRIK5,NLGN1,SYT2,SYT7,CRHR1,CORO1A,CADPS
GO: Biological Process	GO:0060134	prepulse inhibition		6.260E-6	3.342E-2	2.038E-4	1.866E-3	5	18	PTEN,NRXN1,UCN,DRD2,CHD8
GO: Biological Process	GO:0008015	blood circulation		7.133E-6	3.807E-2	2.308E-4	2.114E-3	29	755	KCNMB2,HDAC4,ACTG2,CAMK2N1,SULF1,SCN1A,UCN,SCN4B,KCNMA1,KCNN2,CACNA1H,FGF13,SMPD3,CACNA1E,DRD2,ANGPT1,ANK2,CALM2,CALM3,SKI,TEK,CRH,NUP155,LPA,GRIP2,ELN,TNNI2,SNTA1,CACNA2D3
GO: Biological Process	GO:0031345	negative regulation of cell projection organization		7.372E-6	3.935E-2	2.371E-4	2.171E-3	15	246	BCL11A,PTEN,GFAP,SYNGAP1,NRXN1,NTM,WNT3A,FGF13,DPYSL3,WNT3,WNT5A,BAG5,NLGN1,GRIN2B,TRAK2
GO: Biological Process	GO:0010469	regulation of signaling receptor activity		7.833E-6	4.181E-2	2.504E-4	2.293E-3	14	217	DLGAP2,DLGAP1,PTEN,DLGAP3,NRXN1,SHANK1,DLGAP4,GRIA2,GRIA3,NLGN1,GRIN2B,SHANK3,CRH,SHANK2
GO: Biological Process	GO:0035176	social behavior		7.962E-6	4.250E-2	2.530E-4	2.317E-3	8	66	GABRB3,PTEN,NRXN1,UCN,SHANK1,CHD8,SHANK3,SHANK2
GO: Biological Process	GO:0050768	negative regulation of neurogenesis		8.310E-6	4.436E-2	2.618E-4	2.399E-3	13	189	SOX11,BCL11A,PTEN,SYNGAP1,WNT3A,SYT4,FGF13,WNT3,WNT5A,SKI,ASCL2,TRAK2,CTNNB1
GO: Biological Process	GO:0060992	response to fungicide		8.388E-6	4.478E-2	2.618E-4	2.399E-3	5	19	KDM5B,KDM6B,GRIA2,GRIA3,GRIN2B
GO: Biological Process	GO:1904948	midbrain dopaminergic neuron differentiation		8.388E-6	4.478E-2	2.618E-4	2.399E-3	5	19	FZD1,WNT3A,WNT3,WNT5A,CTNNB1
GO: Biological Process	GO:0048167	regulation of synaptic plasticity		8.594E-6	4.587E-2	2.667E-4	2.443E-3	19	381	MAP1A,MAPT,PTEN,GFAP,SYNGAP1,S100B,STXBP1,KCNN2,SYT4,SHANK1,DRD2,AKAP5,NLGN1,GRIN2B,SYT7,SHANK3,CRH,CRHR1,SHANK2
GO: Biological Process	GO:0033993	response to lipid		8.962E-6	4.784E-2	2.765E-4	2.533E-3	46	1517	IL36A,HMGCS1,PAGR1,SSTR2,PTEN,FOXA1,GGT1,PTK7,FZD1,WNT5B,FZD7,S100B,STXBP1,NTM,UCN,WNT3A,KCNMA1,KCNMB1,PPP1R9B,NR3C2,GNAI1,NKX2-2,TESC,TBL1X,DNMT3A,VLDLR,FOXP2,CALM2,CALM3,WNT3,WNT5A,GRIN2B,ADTRP,TEK,CRH,CCKAR,TFPI,SLC6A1,PPP5C,NCOA1,FOXP1,RORB,UCN3,ELN,CTNNB1,MUC2
GO: Biological Process	GO:0010977	negative regulation of neuron projection development		9.312E-6	4.971E-2	2.857E-4	2.617E-3	13	191	BCL11A,PTEN,GFAP,SYNGAP1,NTM,WNT3A,FGF13,DPYSL3,WNT3,WNT5A,BAG5,NLGN1,TRAK2
GO: Cellular Component	GO:0043005	neuron projection		4.661E-24	2.727E-21	2.727E-21	1.895E-20	89	1768	CHL1,GABRB2,GABRB3,DLGAP2,SPAST,MAP1A,MAP6,MAPT,MARK1,MARK3,ZMYND8,SYT9,SSTR2,PTEN,LRRC4,TULP1,SYNGAP1,CKB,FZD1,PRR12,DIP2A,DLGAP3,NTNG2,CAMK2N1,STXBP1,ABITRAM,NRXN1,NEGR1,NTM,SCN1A,UCN,SCN2A,KCNMA1,KCNN2,KCNQ2,KCNQ3,SYT4,SYT5,PPP1R9B,CACNA1H,FGF13,ADGRL2,SYT13,DYNC1H1,KLC1,SHANK1,WHRN,FKBP15,DPYSL2,DPYSL3,DRD2,AKAP5,ANK2,ANK3,DSCAM,CALM2,CALM3,PTBP2,DLGAP4,APBA1,DYRK1A,ARFGEF2,KIAA1549,GRIA2,GRI…
GO: Cellular Component	GO:0045202	synapse		9.946E-23	5.819E-20	2.909E-20	2.022E-19	84	1662	GABRB2,GABRB3,DLGAP2,DLGAP1,HDAC4,MAP1A,MAPT,ZMYND8,SYT9,BCL11A,PTEN,LRRC4,TULP1,ADD2,SYNGAP1,PRR12,DIP2A,DLGAP3,NTNG2,CAMK2N1,STXBP1,NRXN1,NTM,SCN1A,UCN,WNT3A,SCN2A,KCNMA1,KCNMB1,KCNN2,KCNQ2,KCNQ3,SYT4,SYT5,PPP1R9B,CACNA1H,NR3C2,ADGRL2,SYT13,SHANK1,WHRN,CACNA1E,DPYSL2,DPYSL3,DRD2,AKAP5,ANK2,ANK3,DSCAM,CALM2,CALM3,WNT5A,PKP4,DLGAP4,APBA1,ARFGEF2,NTNG1,PORCN,GRIA2,GRIA3,LRRC4B,CNKSR2,GRIK5,NLGN1,G…
GO: Cellular Component	GO:0098794	postsynapse		6.978E-20	4.082E-17	1.361E-17	9.457E-17	55	833	GABRB2,GABRB3,DLGAP2,DLGAP1,MAP1A,MAPT,ZMYND8,SYT9,BCL11A,PTEN,LRRC4,ADD2,SYNGAP1,PRR12,DIP2A,DLGAP3,CAMK2N1,STXBP1,KCNMA1,KCNN2,SYT4,PPP1R9B,CACNA1H,NR3C2,ADGRL2,SHANK1,WHRN,CACNA1E,DRD2,AKAP5,ANK2,ANK3,WNT5A,PKP4,DLGAP4,APBA1,ARFGEF2,GRIA2,GRIA3,LRRC4B,CNKSR2,GRIK5,NLGN1,GRIN2B,LRRC4C,SYT7,SHANK3,CRHR1,SLC6A1,SHANK2,GRIP2,CTNNB1,SNTA1,PDZD2,GABRA6
GO: Cellular Component	GO:0036477	somatodendritic compartment		7.291E-18	4.265E-15	1.066E-15	7.410E-15	64	1226	CHL1,DLGAP2,MAP1A,MAP6,MAPT,MARK1,MARK3,ZMYND8,SYT9,PTEN,LRRC4,SYNGAP1,CKB,S100B,DIP2A,DLGAP3,EFHC1,CAMK2N1,ABITRAM,NRXN1,NEGR1,SCN1A,UCN,KCNMA1,KCNN2,KCNQ3,SYT4,SYT5,PPP1R9B,CACNA1H,FGF13,DYNC1H1,KLC1,SHANK1,WHRN,CACNA1E,DPYSL2,DRD2,AKAP5,ANK3,DSCAM,PTBP2,DLGAP4,APBA1,DYRK1A,ARFGEF2,GRIA2,GRIA3,CNKSR2,GRIK5,NLGN1,GRIN2B,ADNP,SYT7,SHANK3,CRH,CRHR1,SLC6A1,SHANK2,PPP5C,GRIP2,TRAK2,CTNNB1,GABRA6
GO: Cellular Component	GO:0030425	dendrite		5.148E-17	3.012E-14	5.019E-15	3.488E-14	52	868	CHL1,DLGAP2,MAP1A,MAP6,MAPT,MARK1,MARK3,ZMYND8,SYT9,PTEN,LRRC4,SYNGAP1,CKB,DIP2A,DLGAP3,CAMK2N1,ABITRAM,NEGR1,UCN,KCNMA1,KCNN2,KCNQ3,SYT4,PPP1R9B,CACNA1H,FGF13,SHANK1,WHRN,DPYSL2,DRD2,AKAP5,ANK3,DSCAM,DLGAP4,APBA1,DYRK1A,ARFGEF2,GRIA2,GRIA3,GRIK5,NLGN1,GRIN2B,ADNP,SYT7,SHANK3,CRHR1,SHANK2,PPP5C,GRIP2,TRAK2,CTNNB1,GABRA6
GO: Cellular Component	GO:0097447	dendritic tree		5.148E-17	3.012E-14	5.019E-15	3.488E-14	52	868	CHL1,DLGAP2,MAP1A,MAP6,MAPT,MARK1,MARK3,ZMYND8,SYT9,PTEN,LRRC4,SYNGAP1,CKB,DIP2A,DLGAP3,CAMK2N1,ABITRAM,NEGR1,UCN,KCNMA1,KCNN2,KCNQ3,SYT4,PPP1R9B,CACNA1H,FGF13,SHANK1,WHRN,DPYSL2,DRD2,AKAP5,ANK3,DSCAM,DLGAP4,APBA1,DYRK1A,ARFGEF2,GRIA2,GRIA3,GRIK5,NLGN1,GRIN2B,ADNP,SYT7,SHANK3,CRHR1,SHANK2,PPP5C,GRIP2,TRAK2,CTNNB1,GABRA6
GO: Cellular Component	GO:0030424	axon		9.883E-17	5.781E-14	7.323E-15	5.089E-14	53	914	GABRB3,SPAST,MAP1A,MAP6,MAPT,SYT9,TULP1,NTNG2,STXBP1,ABITRAM,NRXN1,NTM,SCN1A,UCN,SCN2A,KCNMA1,KCNQ2,KCNQ3,SYT4,SYT5,PPP1R9B,FGF13,ADGRL2,SYT13,DYNC1H1,KLC1,WHRN,FKBP15,DPYSL2,DPYSL3,DRD2,ANK3,DSCAM,CALM2,CALM3,PTBP2,DYRK1A,GRIA2,GRIA3,LRRC4B,GRIK5,GRIN2B,SYT2,ADNP,SYT7,CRH,CCKAR,SLC6A1,CORO1A,SHANK2,UCN3,TRAK2,GABRA6
GO: Cellular Component	GO:0097060	synaptic membrane		1.001E-16	5.858E-14	7.323E-15	5.089E-14	39	498	GABRB2,GABRB3,DLGAP2,DLGAP1,PTEN,LRRC4,NTNG2,STXBP1,NRXN1,SCN1A,SCN2A,KCNMA1,PPP1R9B,CACNA1H,ADGRL2,SHANK1,CACNA1E,DRD2,AKAP5,ANK2,ANK3,APBA1,NTNG1,GRIA2,GRIA3,LRRC4B,CNKSR2,GRIK5,NLGN1,GRIN2B,LRRC4C,SYT7,SHANK3,SLC6A1,SHANK2,GRIP2,CTNNB1,SNTA1,GABRA6
GO: Cellular Component	GO:0098978	glutamatergic synapse		5.876E-16	3.437E-13	3.819E-14	2.654E-13	39	525	DLGAP2,DLGAP1,LRRC4,ADD2,SYNGAP1,DLGAP3,NTNG2,STXBP1,NRXN1,WNT3A,SCN2A,KCNMA1,SYT4,CACNA1H,NR3C2,ADGRL2,SHANK1,DRD2,AKAP5,WNT5A,DLGAP4,APBA1,NTNG1,PORCN,GRIA2,GRIA3,LRRC4B,CNKSR2,GRIK5,NLGN1,GRIN2B,LRRC4C,SYT7,SHANK3,CORO1A,SHANK2,CADPS,LPA,GRIP2
GO: Cellular Component	GO:0099572	postsynaptic specialization		8.637E-15	5.053E-12	5.053E-13	3.512E-12	36	485	GABRB2,GABRB3,DLGAP2,DLGAP1,MAP1A,MAPT,BCL11A,LRRC4,ADD2,SYNGAP1,PRR12,DLGAP3,CAMK2N1,PPP1R9B,NR3C2,SHANK1,DRD2,AKAP5,ANK2,PKP4,DLGAP4,ARFGEF2,GRIA2,GRIA3,LRRC4B,CNKSR2,GRIK5,NLGN1,GRIN2B,LRRC4C,SHANK3,SHANK2,GRIP2,CTNNB1,PDZD2,GABRA6
GO: Cellular Component	GO:0098984	neuron to neuron synapse		3.335E-14	1.951E-11	1.773E-12	1.232E-11	35	479	DLGAP2,DLGAP1,MAP1A,MAPT,SYT9,BCL11A,LRRC4,ADD2,SYNGAP1,PRR12,DLGAP3,CAMK2N1,PPP1R9B,NR3C2,SHANK1,DRD2,AKAP5,ANK2,PKP4,ARFGEF2,GRIA2,GRIA3,LRRC4B,CNKSR2,GRIK5,NLGN1,GRIN2B,LRRC4C,SYT7,SHANK3,SHANK2,GRIP2,CTNNB1,PDZD2,GABRA6
GO: Cellular Component	GO:0045211	postsynaptic membrane		2.394E-13	1.400E-10	1.167E-11	8.109E-11	29	349	GABRB2,GABRB3,DLGAP2,DLGAP1,PTEN,LRRC4,KCNMA1,CACNA1H,ADGRL2,SHANK1,CACNA1E,DRD2,ANK2,ANK3,GRIA2,GRIA3,LRRC4B,CNKSR2,GRIK5,NLGN1,GRIN2B,LRRC4C,SHANK3,SLC6A1,SHANK2,GRIP2,CTNNB1,SNTA1,GABRA6
GO: Cellular Component	GO:0034702	ion channel complex		2.593E-13	1.517E-10	1.167E-11	8.109E-11	28	325	GABRB2,GABRB3,KCNMB2,DLGAP3,KCNQ5,SCN1A,SCN2A,SCN4B,KCNMA1,KCNMB1,KCNQ2,KCNQ3,CACNA1H,SHANK1,CACNA1E,CALM2,CALM3,PORCN,GRIA2,GRIA3,GRIK5,NLGN1,GRIN2B,SHANK3,SHANK2,KCNQ4,CACNA2D3,GABRA6
GO: Cellular Component	GO:0043197	dendritic spine		3.671E-13	2.147E-10	1.534E-11	1.066E-10	26	281	DLGAP2,MAPT,ZMYND8,SYT9,PTEN,LRRC4,DIP2A,DLGAP3,KCNN2,PPP1R9B,SHANK1,DRD2,AKAP5,APBA1,ARFGEF2,GRIA2,GRIA3,GRIK5,NLGN1,GRIN2B,SYT7,SHANK3,CRHR1,SHANK2,GRIP2,GABRA6
GO: Cellular Component	GO:0044309	neuron spine		5.100E-13	2.983E-10	1.989E-11	1.382E-10	26	285	DLGAP2,MAPT,ZMYND8,SYT9,PTEN,LRRC4,DIP2A,DLGAP3,KCNN2,PPP1R9B,SHANK1,DRD2,AKAP5,APBA1,ARFGEF2,GRIA2,GRIA3,GRIK5,NLGN1,GRIN2B,SYT7,SHANK3,CRHR1,SHANK2,GRIP2,GABRA6
GO: Cellular Component	GO:0014069	postsynaptic density		9.898E-13	5.791E-10	3.406E-11	2.367E-10	32	451	DLGAP2,DLGAP1,MAP1A,MAPT,BCL11A,LRRC4,ADD2,SYNGAP1,PRR12,DLGAP3,CAMK2N1,PPP1R9B,NR3C2,SHANK1,DRD2,AKAP5,ANK2,PKP4,ARFGEF2,GRIA2,GRIA3,LRRC4B,CNKSR2,GRIK5,NLGN1,GRIN2B,LRRC4C,SHANK3,SHANK2,GRIP2,CTNNB1,PDZD2
GO: Cellular Component	GO:0032279	asymmetric synapse		9.898E-13	5.791E-10	3.406E-11	2.367E-10	32	451	DLGAP2,DLGAP1,MAP1A,MAPT,BCL11A,LRRC4,ADD2,SYNGAP1,PRR12,DLGAP3,CAMK2N1,PPP1R9B,NR3C2,SHANK1,DRD2,AKAP5,ANK2,PKP4,ARFGEF2,GRIA2,GRIA3,LRRC4B,CNKSR2,GRIK5,NLGN1,GRIN2B,LRRC4C,SHANK3,SHANK2,GRIP2,CTNNB1,PDZD2
GO: Cellular Component	GO:1902495	transmembrane transporter complex		1.590E-12	9.302E-10	5.168E-11	3.592E-10	28	350	GABRB2,GABRB3,KCNMB2,DLGAP3,KCNQ5,SCN1A,SCN2A,SCN4B,KCNMA1,KCNMB1,KCNQ2,KCNQ3,CACNA1H,SHANK1,CACNA1E,CALM2,CALM3,PORCN,GRIA2,GRIA3,GRIK5,NLGN1,GRIN2B,SHANK3,SHANK2,KCNQ4,CACNA2D3,GABRA6
GO: Cellular Component	GO:0150034	distal axon		2.245E-12	1.313E-9	6.912E-11	4.803E-10	33	494	GABRB3,MAP1A,MAPT,SYT9,TULP1,STXBP1,ABITRAM,NRXN1,UCN,KCNMA1,PPP1R9B,FGF13,KLC1,WHRN,FKBP15,DPYSL2,DPYSL3,DRD2,DSCAM,CALM2,CALM3,PTBP2,GRIA2,GRIA3,GRIK5,GRIN2B,SYT2,SYT7,CCKAR,SHANK2,UCN3,TRAK2,GABRA6
GO: Cellular Component	GO:1990351	transporter complex		4.375E-12	2.559E-9	1.280E-10	8.894E-10	28	365	GABRB2,GABRB3,KCNMB2,DLGAP3,KCNQ5,SCN1A,SCN2A,SCN4B,KCNMA1,KCNMB1,KCNQ2,KCNQ3,CACNA1H,SHANK1,CACNA1E,CALM2,CALM3,PORCN,GRIA2,GRIA3,GRIK5,NLGN1,GRIN2B,SHANK3,SHANK2,KCNQ4,CACNA2D3,GABRA6
GO: Cellular Component	GO:0034703	cation channel complex		5.043E-12	2.950E-9	1.405E-10	9.763E-10	23	242	KCNMB2,DLGAP3,KCNQ5,SCN1A,SCN2A,SCN4B,KCNMA1,KCNMB1,KCNQ2,KCNQ3,CACNA1H,SHANK1,CACNA1E,CALM2,CALM3,PORCN,GRIA2,GRIA3,GRIK5,NLGN1,GRIN2B,KCNQ4,CACNA2D3
GO: Cellular Component	GO:0044297	cell body		8.489E-12	4.966E-9	2.257E-10	1.569E-9	45	916	MAP1A,MAPT,ACTG2,GFAP,CKB,S100B,DLGAP3,EFHC1,CAMK2N1,NRXN1,NEGR1,SCN1A,UCN,KCNMA1,KCNN2,KCNQ3,SYT4,SYT5,PPP1R9B,CACNA1H,DYNC1H1,KLC1,WHRN,CACNA1E,DPYSL2,DPYSL3,DRD2,AKAP5,DSCAM,PTBP2,DLGAP4,GRIA2,GRIA3,CNKSR2,GRIK5,GRIN2B,ADNP,SYT7,CRH,CRHR1,SLC6A1,SHANK2,PPP5C,TRAK2,GABRA6
GO: Cellular Component	GO:0043025	neuronal cell body		1.128E-11	6.599E-9	2.869E-10	1.994E-9	42	818	MAP1A,MAPT,CKB,S100B,DLGAP3,EFHC1,CAMK2N1,NRXN1,NEGR1,SCN1A,UCN,KCNMA1,KCNN2,KCNQ3,SYT4,SYT5,PPP1R9B,CACNA1H,DYNC1H1,KLC1,WHRN,CACNA1E,DPYSL2,DRD2,AKAP5,DSCAM,PTBP2,DLGAP4,GRIA2,GRIA3,CNKSR2,GRIK5,GRIN2B,ADNP,SYT7,CRH,CRHR1,SLC6A1,SHANK2,PPP5C,TRAK2,GABRA6
GO: Cellular Component	GO:0099240	intrinsic component of synaptic membrane		2.036E-11	1.191E-8	4.964E-10	3.450E-9	23	259	GABRB2,GABRB3,LRRC4,NTNG2,NRXN1,SCN1A,SCN2A,KCNMA1,CACNA1H,ADGRL2,CACNA1E,DRD2,NTNG1,GRIA2,GRIA3,LRRC4B,GRIK5,NLGN1,GRIN2B,LRRC4C,SYT7,SLC6A1,GABRA6
GO: Cellular Component	GO:0098793	presynapse		3.557E-11	2.081E-8	8.325E-10	5.785E-9	38	710	GABRB3,SYT9,TULP1,NTNG2,STXBP1,NRXN1,SCN1A,UCN,WNT3A,SCN2A,KCNMA1,SYT4,SYT5,CACNA1H,NR3C2,WHRN,CACNA1E,DPYSL2,DRD2,CALM2,CALM3,APBA1,NTNG1,GRIA2,GRIA3,LRRC4B,GRIK5,NLGN1,GRIN2B,SYT2,SYT7,CCKAR,SLC6A1,SHANK2,CADPS,UCN3,CTNNB1,GABRA6
GO: Cellular Component	GO:0099699	integral component of synaptic membrane		1.898E-10	1.110E-7	4.270E-9	2.968E-8	21	239	GABRB2,GABRB3,LRRC4,NRXN1,SCN1A,SCN2A,KCNMA1,CACNA1H,ADGRL2,CACNA1E,DRD2,GRIA2,GRIA3,LRRC4B,GRIK5,NLGN1,GRIN2B,LRRC4C,SYT7,SLC6A1,GABRA6
GO: Cellular Component	GO:0042734	presynaptic membrane		3.332E-10	1.949E-7	7.219E-9	5.017E-8	20	222	NTNG2,STXBP1,NRXN1,SCN1A,SCN2A,KCNMA1,CACNA1H,CACNA1E,DRD2,APBA1,NTNG1,GRIA2,GRIA3,LRRC4B,GRIK5,GRIN2B,SYT7,SLC6A1,CTNNB1,GABRA6
GO: Cellular Component	GO:0098889	intrinsic component of presynaptic membrane		3.939E-9	2.304E-6	8.230E-8	5.720E-7	15	137	NTNG2,NRXN1,SCN1A,SCN2A,KCNMA1,CACNA1H,CACNA1E,DRD2,NTNG1,GRIA2,GRIA3,GRIK5,GRIN2B,SYT7,SLC6A1
GO: Cellular Component	GO:0000785	chromatin		5.544E-9	3.243E-6	1.118E-7	7.773E-7	50	1326	MYT1L,SOX11,TSPYL2,ASH1L,SRPK2,IRF6,POGZ,FOXN3,NR6A1,KMT2E,FOXA1,HNF4G,ARNTL2,SOX7,ARID1B,LDB1,SATB1,SPDEF,NR3C2,NKX2-2,DNMT3A,TCF4,MMS22L,TCF7L2,DEAF1,FOXP2,PHF12,NSD1,POU3F2,POU3F4,SIN3A,ADNP,CREB3L4,RFX3,RFX4,CREBBP,FOXP4,NKX2-4,SETD5,ASCL2,MKX,NCOA1,SMARCC2,FOXP1,RORB,PAX3,PAX5,CTNNB1,OLIG2,H3C14
GO: Cellular Component	GO:0008328	ionotropic glutamate receptor complex		1.389E-8	8.128E-6	2.709E-7	1.883E-6	10	56	DLGAP3,SHANK1,PORCN,GRIA2,GRIA3,GRIK5,NLGN1,GRIN2B,SHANK3,SHANK2
GO: Cellular Component	GO:0098878	neurotransmitter receptor complex		1.981E-8	1.159E-5	3.738E-7	2.598E-6	10	58	DLGAP3,SHANK1,PORCN,GRIA2,GRIA3,GRIK5,NLGN1,GRIN2B,SHANK3,SHANK2
GO: Cellular Component	GO:0099055	integral component of postsynaptic membrane		2.255E-8	1.319E-5	4.122E-7	2.865E-6	16	179	GABRB2,GABRB3,LRRC4,CACNA1H,ADGRL2,CACNA1E,DRD2,GRIA2,GRIA3,LRRC4B,GRIK5,NLGN1,GRIN2B,LRRC4C,SLC6A1,GABRA6
GO: Cellular Component	GO:0098936	intrinsic component of postsynaptic membrane		4.856E-8	2.841E-5	8.608E-7	5.983E-6	16	189	GABRB2,GABRB3,LRRC4,CACNA1H,ADGRL2,CACNA1E,DRD2,GRIA2,GRIA3,LRRC4B,GRIK5,NLGN1,GRIN2B,LRRC4C,SLC6A1,GABRA6
GO: Cellular Component	GO:0099056	integral component of presynaptic membrane		7.322E-8	4.284E-5	1.260E-6	8.756E-6	13	124	NRXN1,SCN1A,SCN2A,KCNMA1,CACNA1H,CACNA1E,DRD2,GRIA2,GRIA3,GRIK5,GRIN2B,SYT7,SLC6A1
GO: Cellular Component	GO:0005694	chromosome		9.288E-8	5.434E-5	1.552E-6	1.079E-5	60	1900	MYT1L,SOX11,ELOA2,TSPYL2,ASH1L,SRPK2,IRF6,POGZ,FOXN3,NR6A1,KMT2E,FOXA1,HNF4G,ARNTL2,PHF2,SOX7,ARID1B,LDB1,SATB1,PINX1,SPDEF,NR3C2,NKX2-2,DNMT3A,RAD51C,TCF4,MMS22L,TCF7L2,DEAF1,FOXP2,PHF12,NSD1,CENPO,POU3F2,POU3F4,SIN3A,XRCC3,ADNP,CREB3L4,RFX3,RFX4,CREBBP,FOXP4,KANSL1,NKX2-4,KMT5B,SETD5,ASCL2,MKX,NCOA1,SMARCC2,FOXP1,RORB,PAX3,PAX5,CTNNB1,MBD5,POLQ,OLIG2,H3C14
GO: Cellular Component	GO:0043198	dendritic shaft		1.465E-7	8.572E-5	2.381E-6	1.655E-5	10	71	MAP1A,ZMYND8,SYNGAP1,WHRN,AKAP5,GRIA2,GRIA3,NLGN1,GRIP2,CTNNB1
GO: Cellular Component	GO:0044306	neuron projection terminus		1.925E-7	1.126E-4	3.044E-6	2.115E-5	19	293	GABRB3,SYT9,TULP1,STXBP1,UCN,KCNMA1,SYT4,DPYSL2,DRD2,GRIA2,GRIA3,GRIK5,GRIN2B,SYT2,SYT7,CCKAR,SHANK2,UCN3,GABRA6
GO: Cellular Component	GO:0098797	plasma membrane protein complex		2.066E-7	1.209E-4	3.180E-6	2.210E-5	33	778	KCNMB2,FZD1,DLGAP3,AP2S1,KCNQ5,SCN1A,WNT3A,SCN2A,SCN4B,KCNMA1,KCNMB1,KCNQ2,KCNQ3,CACNA1H,GNAI1,SHANK1,CACNA1E,CALM2,CALM3,WNT3,PORCN,GRIA2,GRIA3,GRIK5,NLGN1,GRIN2B,CAV2,SHANK3,SHANK2,KCNQ4,CTNNB1,SNTA1,CACNA2D3
GO: Cellular Component	GO:0043679	axon terminus		2.698E-7	1.578E-4	4.047E-6	2.812E-5	18	270	GABRB3,SYT9,TULP1,STXBP1,UCN,KCNMA1,DPYSL2,DRD2,GRIA2,GRIA3,GRIK5,GRIN2B,SYT2,SYT7,CCKAR,SHANK2,UCN3,GABRA6
GO: Cellular Component	GO:0030426	growth cone		3.714E-7	2.173E-4	5.432E-6	3.775E-5	17	247	MAPT,ABITRAM,NRXN1,PPP1R9B,FGF13,KLC1,WHRN,FKBP15,DPYSL2,DPYSL3,DSCAM,CALM2,CALM3,PTBP2,GRIA2,SHANK2,TRAK2
GO: Cellular Component	GO:0043195	terminal bouton		4.092E-7	2.394E-4	5.838E-6	4.057E-5	14	168	GABRB3,SYT9,STXBP1,KCNMA1,DPYSL2,GRIA2,GRIA3,GRIK5,GRIN2B,SYT2,SYT7,CCKAR,SHANK2,GABRA6
GO: Cellular Component	GO:0043194	axon initial segment		4.413E-7	2.581E-4	6.146E-6	4.271E-5	6	20	MAP1A,SCN1A,SCN2A,KCNQ2,KCNQ3,ANK3
GO: Cellular Component	GO:0030427	site of polarized growth		5.501E-7	3.218E-4	7.484E-6	5.201E-5	17	254	MAPT,ABITRAM,NRXN1,PPP1R9B,FGF13,KLC1,WHRN,FKBP15,DPYSL2,DPYSL3,DSCAM,CALM2,CALM3,PTBP2,GRIA2,SHANK2,TRAK2
GO: Cellular Component	GO:0044304	main axon		1.019E-6	5.960E-4	1.355E-5	9.414E-5	10	87	MAP1A,MAPT,SCN1A,UCN,SCN2A,KCNQ2,KCNQ3,ANK3,CRH,UCN3
GO: Cellular Component	GO:0099060	integral component of postsynaptic specialization membrane		1.203E-6	7.035E-4	1.563E-5	1.087E-4	11	110	GABRB2,GABRB3,LRRC4,GRIA2,GRIA3,LRRC4B,GRIK5,NLGN1,GRIN2B,LRRC4C,GABRA6
GO: Cellular Component	GO:0005667	transcription regulator complex		1.320E-6	7.724E-4	1.679E-5	1.167E-4	25	538	HDAC4,NR6A1,HNF4G,ARNTL2,LDB1,TBL1X,TCF4,TCF7L2,DEAF1,PHF12,POU3F2,SIN3A,MED13L,SKI,ADNP,RFX3,TBL1XR1,CREBBP,PDLIM1,ASCL2,MKX,PAX3,PAX5,CTNNB1,OLIG2
GO: Cellular Component	GO:0098948	intrinsic component of postsynaptic specialization membrane		2.041E-6	1.194E-3	2.540E-5	1.765E-4	11	116	GABRB2,GABRB3,LRRC4,GRIA2,GRIA3,LRRC4B,GRIK5,NLGN1,GRIN2B,LRRC4C,GABRA6
GO: Cellular Component	GO:0070369	beta-catenin-TCF7L2 complex		3.812E-6	2.230E-3	4.645E-5	3.228E-4	3	3	TCF4,TCF7L2,CTNNB1
GO: Cellular Component	GO:0048786	presynaptic active zone		4.415E-6	2.583E-3	5.271E-5	3.663E-4	10	102	NTNG2,STXBP1,NRXN1,KCNMA1,CACNA1H,NR3C2,APBA1,NTNG1,SHANK2,CTNNB1
GO: Cellular Component	GO:0034705	potassium channel complex		4.823E-6	2.821E-3	5.643E-5	3.921E-4	10	103	KCNMB2,KCNQ5,KCNMA1,KCNMB1,KCNQ2,KCNQ3,CALM2,CALM3,GRIK5,KCNQ4
GO: Cellular Component	GO:0060076	excitatory synapse		5.243E-6	3.067E-3	6.014E-5	4.180E-4	9	82	LRRC4,NTM,SHANK1,AKAP5,GRIA2,GRIA3,NLGN1,GRIN2B,SHANK3
GO: Cellular Component	GO:0099634	postsynaptic specialization membrane		5.948E-6	3.480E-3	6.692E-5	4.651E-4	12	155	GABRB2,GABRB3,LRRC4,GRIA2,GRIA3,LRRC4B,CNKSR2,GRIK5,NLGN1,GRIN2B,LRRC4C,GABRA6
GO: Cellular Component	GO:0099092	postsynaptic density, intracellular component		8.812E-6	5.155E-3	9.651E-5	6.707E-4	6	32	DLGAP1,SYNGAP1,NR3C2,AKAP5,SHANK3,CTNNB1
GO: Cellular Component	GO:0048787	presynaptic active zone membrane		8.909E-6	5.212E-3	9.651E-5	6.707E-4	7	48	NTNG2,STXBP1,NRXN1,KCNMA1,CACNA1H,APBA1,NTNG1
GO: Cellular Component	GO:0033268	node of Ranvier		1.141E-5	6.673E-3	1.213E-4	8.432E-4	5	20	SCN1A,SCN2A,KCNQ2,KCNQ3,ANK3
GO: Cellular Component	GO:0008076	voltage-gated potassium channel complex		1.241E-5	7.257E-3	1.296E-4	9.006E-4	9	91	KCNMB2,KCNQ5,KCNMA1,KCNMB1,KCNQ2,KCNQ3,CALM2,CALM3,KCNQ4
GO: Cellular Component	GO:0098685	Schaffer collateral - CA1 synapse		1.395E-5	8.162E-3	1.432E-4	9.952E-4	10	116	LRRC4,NTNG2,NRXN1,SHANK1,APBA1,NTNG1,GRIA2,LRRC4C,LPA,CTNNB1
GO: Cellular Component	GO:0070382	exocytic vesicle		1.458E-5	8.527E-3	1.446E-4	1.005E-3	17	324	SYTL2,SYT9,SYT4,SYT5,SYT13,DPYSL3,DRD2,CALM2,CALM3,APBA1,GRIA2,GRIN2B,SYT2,SYT7,SYTL3,CTNNB1,SYTL1
GO: Cellular Component	GO:0035517	PR-DUB complex		1.483E-5	8.678E-3	1.446E-4	1.005E-3	3	4	BAP1,ASXL3,ASXL2
GO: Cellular Component	GO:0071664	catenin-TCF7L2 complex		1.483E-5	8.678E-3	1.446E-4	1.005E-3	3	4	TCF4,TCF7L2,CTNNB1
GO: Cellular Component	GO:0031045	dense core granule		1.797E-5	1.051E-2	1.724E-4	1.198E-3	6	36	SYT9,SYT4,SYT5,SYT2,SYT7,CADPS
GO: Cellular Component	GO:0099091	postsynaptic specialization, intracellular component		2.481E-5	1.452E-2	2.341E-4	1.627E-3	6	38	DLGAP1,SYNGAP1,NR3C2,AKAP5,SHANK3,CTNNB1
GO: Cellular Component	GO:0017146	NMDA selective glutamate receptor complex		2.598E-5	1.520E-2	2.412E-4	1.676E-3	4	12	DLGAP3,SHANK1,NLGN1,GRIN2B
GO: Cellular Component	GO:1990907	beta-catenin-TCF complex		5.125E-5	2.998E-2	4.685E-4	3.256E-3	4	14	LDB1,TCF4,TCF7L2,CTNNB1
GO: Cellular Component	GO:0099512	supramolecular fiber		5.559E-5	3.252E-2	5.003E-4	3.477E-3	47	1670	DLGAP2,SPAST,HDAC4,MAP1A,MAP6,MAPT,ACTG2,FOXA1,GFAP,EFHC1,ABITRAM,SCN1A,KCNN2,TEKT1,PPP1R9B,FGF13,SPAG16,DYNC1H1,KLC1,TLK2,WHRN,DPYSL2,DPYSL3,DRD2,AKAP5,ANGPT1,ANK2,ANK3,UBE2Q1,GAS2L3,CALM2,CALM3,DYRK1A,ARFGEF2,NLGN1,GRIN2B,TEK,ARHGEF25,CORO1A,SHANK2,PDLIM1,GATAD1,ELN,CTNNB1,SYTL1,TNNI2,MYO16
GO: Cellular Component	GO:0098982	GABA-ergic synapse		5.676E-5	3.321E-2	5.031E-4	3.497E-3	9	110	GABRB2,GABRB3,NRXN1,NR3C2,CACNA1E,DRD2,SYT7,SLC6A1,GABRA6
GO: Cellular Component	GO:0099081	supramolecular polymer		6.242E-5	3.652E-2	5.450E-4	3.788E-3	47	1678	DLGAP2,SPAST,HDAC4,MAP1A,MAP6,MAPT,ACTG2,FOXA1,GFAP,EFHC1,ABITRAM,SCN1A,KCNN2,TEKT1,PPP1R9B,FGF13,SPAG16,DYNC1H1,KLC1,TLK2,WHRN,DPYSL2,DPYSL3,DRD2,AKAP5,ANGPT1,ANK2,ANK3,UBE2Q1,GAS2L3,CALM2,CALM3,DYRK1A,ARFGEF2,NLGN1,GRIN2B,TEK,ARHGEF25,CORO1A,SHANK2,PDLIM1,GATAD1,ELN,CTNNB1,SYTL1,TNNI2,MYO16
GO: Cellular Component	GO:0034706	sodium channel complex		6.528E-5	3.819E-2	5.616E-4	3.903E-3	5	28	SCN1A,SCN2A,SCN4B,CACNA1H,GRIK5
GO: Cellular Component	GO:0099012	neuronal dense core vesicle membrane		7.246E-5	4.239E-2	6.143E-4	4.270E-3	3	6	SYT4,SYT5,CADPS
Pathway	1268763	Neuronal System	BioSystems: REACTOME	3.312E-20	4.717E-17	4.717E-17	3.698E-16	38	349	GABRB2,GABRB3,KCNMB2,DLGAP2,DLGAP1,SYT9,DLGAP3,AP2S1,STXBP1,KCNQ5,NRXN1,KCNMA1,KCNMB1,KCNN2,KCNQ2,KCNQ3,GNAI1,SHANK1,CACNA1E,AKAP5,CALM2,CALM3,DLGAP4,APBA1,GRIA2,GRIA3,GRIK5,NLGN1,GRIN2B,SYT2,SYT7,SHANK3,SLC6A1,SHANK2,KCNQ4,GRIP2,CACNA2D3,GABRA6
Pathway	1427850	Interactions of neurexins and neuroligins at synapses	BioSystems: REACTOME	3.118E-14	4.440E-11	2.220E-11	1.740E-10	15	58	DLGAP2,DLGAP1,SYT9,DLGAP3,STXBP1,NRXN1,SHANK1,DLGAP4,APBA1,NLGN1,GRIN2B,SYT2,SYT7,SHANK3,SHANK2
Pathway	1427849	Protein-protein interactions at synapses	BioSystems: REACTOME	5.667E-14	8.070E-11	2.690E-11	2.109E-10	16	72	DLGAP2,DLGAP1,SYT9,DLGAP3,STXBP1,NRXN1,SHANK1,DLGAP4,APBA1,GRIA3,NLGN1,GRIN2B,SYT2,SYT7,SHANK3,SHANK2
Pathway	M7761	Melanogenesis	MSigDB C2 BIOCARTA (v7.5.1)	1.675E-8	2.386E-5	4.772E-6	3.740E-5	13	101	FZD1,WNT5B,FZD7,WNT3A,GNAI1,TCF7L2,CALM2,CALM3,WNT3,WNT5A,CREB3L4,CREBBP,CTNNB1
Pathway	83092	Melanogenesis	BioSystems: KEGG	1.675E-8	2.386E-5	4.772E-6	3.740E-5	13	101	FZD1,WNT5B,FZD7,WNT3A,GNAI1,TCF7L2,CALM2,CALM3,WNT3,WNT5A,CREB3L4,CREBBP,CTNNB1
Pathway	1268766	Transmission across Chemical Synapses	BioSystems: REACTOME	3.461E-8	4.928E-5	8.213E-6	6.438E-5	18	217	GABRB2,GABRB3,AP2S1,STXBP1,GNAI1,CACNA1E,AKAP5,CALM2,CALM3,APBA1,GRIA2,GRIA3,GRIK5,GRIN2B,SLC6A1,GRIP2,CACNA2D3,GABRA6
Pathway	1270433	Chromatin organization	BioSystems: REACTOME	6.777E-8	9.651E-5	1.206E-5	9.456E-5	20	279	KDM5B,ASH1L,KDM6B,KMT2E,PHF21A,PHF2,KMT2C,ARID1B,TBL1X,DNMT3A,KDM5A,NSD1,TBL1XR1,CREBBP,KANSL1,KMT5B,NCOA1,SMARCC2,PAX3,H3C14
Pathway	1270434	Chromatin modifying enzymes	BioSystems: REACTOME	6.777E-8	9.651E-5	1.206E-5	9.456E-5	20	279	KDM5B,ASH1L,KDM6B,KMT2E,PHF21A,PHF2,KMT2C,ARID1B,TBL1X,DNMT3A,KDM5A,NSD1,TBL1XR1,CREBBP,KANSL1,KMT5B,NCOA1,SMARCC2,PAX3,H3C14
Pathway	M19428	Wnt signaling pathway	MSigDB C2 BIOCARTA (v7.5.1)	2.872E-7	4.089E-4	4.544E-5	3.562E-4	14	150	FZD1,WNT5B,FZD7,WNT3A,TBL1X,TCF7L2,WNT3,WNT5A,PORCN,CHD8,TBL1XR1,CREBBP,PPP2R5D,CTNNB1
Pathway	1270325	Interaction between L1 and Ankyrins	BioSystems: REACTOME	5.775E-7	8.224E-4	8.224E-5	6.447E-4	7	30	SCN1A,SCN2A,SCN4B,KCNQ2,KCNQ3,ANK2,ANK3
Pathway	PW:0000201	canonical Wnt signaling	Pathway Ontology	9.814E-7	1.398E-3	1.238E-4	9.706E-4	8	46	FZD1,WNT5B,WNT3A,TCF7L2,WNT3,WNT5A,CREBBP,CTNNB1
Pathway	83061	Wnt signaling pathway	BioSystems: KEGG	1.043E-6	1.486E-3	1.238E-4	9.706E-4	13	143	FZD1,WNT5B,FZD7,WNT3A,TBL1X,TCF7L2,WNT3,WNT5A,PORCN,CHD8,TBL1XR1,CREBBP,CTNNB1
Pathway	1268786	Neurotransmitter Receptor Binding And Downstream Transmission In The Postsynaptic Cell	BioSystems: REACTOME	1.322E-6	1.882E-3	1.448E-4	1.135E-3	13	146	GABRB2,GABRB3,AP2S1,GNAI1,AKAP5,CALM2,CALM3,GRIA2,GRIA3,GRIK5,GRIN2B,GRIP2,GABRA6
Pathway	83113	Basal cell carcinoma	BioSystems: KEGG	4.011E-6	5.712E-3	3.808E-4	2.985E-3	8	55	FZD1,WNT5B,FZD7,WNT3A,TCF7L2,WNT3,WNT5A,CTNNB1
Pathway	M17807	Basal cell carcinoma	MSigDB C2 BIOCARTA (v7.5.1)	4.011E-6	5.712E-3	3.808E-4	2.985E-3	8	55	FZD1,WNT5B,FZD7,WNT3A,TCF7L2,WNT3,WNT5A,CTNNB1
Pathway	1270323	L1CAM interactions	BioSystems: REACTOME	9.647E-6	1.374E-2	8.187E-4	6.417E-3	10	102	CHL1,AP2S1,SCN1A,SCN2A,SCN4B,KCNQ2,KCNQ3,DPYSL2,ANK2,ANK3
Pathway	1268822	Ca2+ activated K+ channels	BioSystems: REACTOME	9.924E-6	1.413E-2	8.187E-4	6.417E-3	4	9	KCNMB2,KCNMA1,KCNMB1,KCNN2
Pathway	P00037	Ionotropic glutamate receptor pathway	PantherDB	1.035E-5	1.474E-2	8.187E-4	6.417E-3	7	45	SHANK1,CACNA1E,GRIA2,GRIA3,GRIK5,GRIN2B,SHANK3
Pathway	1339117	Phase 0 - rapid depolarisation	BioSystems: REACTOME	1.393E-5	1.984E-2	1.013E-3	7.938E-3	7	47	SCN1A,SCN2A,SCN4B,FGF13,CALM2,CALM3,CACNA2D3
Pathway	1270302	Developmental Biology	BioSystems: REACTOME	1.422E-5	2.025E-2	1.013E-3	7.938E-3	38	1078	CHL1,MARK3,PAGR1,NR6A1,HNF4G,SYNGAP1,KMT2C,AP2S1,SCN1A,SCN2A,SCN4B,KCNQ2,KCNQ3,CACNA1H,NKX2-2,TBL1X,TCF4,DPYSL2,DPYSL3,ANGPT1,ANK2,ANK3,CALM2,CALM3,PKP4,CNKSR2,GRIN2B,MED13L,TEK,TBL1XR1,CREBBP,SHANK3,PPP2R5D,PPP5C,NCOA1,FOXP1,CTNNB1,H3C14
Pathway	1269570	Class B/2 (Secretin family receptors)	BioSystems: REACTOME	3.008E-5	4.284E-2	2.040E-3	1.599E-2	9	93	FZD1,FZD7,UCN,WNT3A,WNT3,WNT5A,CRH,CRHR1,UCN3
Disease	C1535926	Neurodevelopmental Disorders	DisGeNET Curated	3.619E-51	2.241E-47	2.241E-47	2.086E-46	42	93	MYT1L,GABRB2,GABRB3,DLGAP1,SPAST,ASH1L,CHD2,POGZ,KMT2E,PTEN,TRIP12,PTK7,WAC,SYNGAP1,PHF2,KMT2C,ARID1B,STXBP1,SCN1A,SCN2A,KCNQ2,TCF4,TCF7L2,ANK2,DSCAM,DYRK1A,GRIN2B,MED13L,ADNP,TBL1XR1,SLC6A1,WDR45,PPP2R5D,KMT5B,SETD5,ASXL3,ANKRD11,FOXP1,PAX5,CTNNB1,TBR1,CACNA2D3
Disease	C3714756	Intellectual Disability	DisGeNET BeFree	7.424E-40	4.598E-36	2.299E-36	2.140E-35	94	1219	MYT1L,CHL1,GABRB2,GABRB3,SOX11,UBR1,KDM5B,SPAST,HDAC4,MAP6,MAPT,MFHAS1,TSPYL2,ASH1L,CHD2,POGZ,BCL11A,PTEN,TRIP12,PHF21A,WAC,SYNGAP1,PRR12,KMT2C,ARID1B,NTNG2,STXBP1,KCNQ5,NRXN1,NEGR1,SCN1A,UCN,SCN2A,EIF2S2,KCNMA1,KCNQ2,KCNQ3,FGF13,TESC,DYNC1H1,DNMT3A,SHANK1,TLK2,VLDLR,TCF4,DRD2,DEAF1,TCF20,ANK3,DSCAM,FOXP2,KDM5A,NXPH1,DYRK1A,NSD1,NTNG1,GRIA2,GRIA3,POU3F2,POU3F4,CHD8,CNKSR2,SIN3A,NLGN1,GRIN2B,NAA50…
Disease	C1510586	Autism Spectrum Disorders	DisGeNET BeFree	4.400E-34	2.726E-30	9.085E-31	8.457E-30	80	1018	GABRB3,DLGAP1,KDM5B,CELF4,SPAST,HDAC4,MAPT,MARK1,ASH1L,CHD2,POGZ,PTEN,LRRC4,TRIP12,ARNTL2,GFAP,PHF21A,SYNGAP1,KMT2C,S100B,DIP2A,ARID1B,NRXN1,NEGR1,NTM,SCN1A,SCN2A,KCNMA1,KCNQ2,TAOK1,CACNA1H,NR3C2,TESC,AIM2,DNMT3A,SHANK1,TLK2,TCF4,DPYSL3,XRN2,DRD2,DEAF1,ANGPT1,TCF20,ANK2,ANK3,FOXP2,KDM5A,DLGAP4,NXPH1,DYRK1A,NSD1,GRIA2,POU3F2,CHD8,SIN3A,NLGN1,GRIN2B,ADNP,TBL1XR1,CREBBP,SHANK3,CRH,SLC6A1,WDR45,PPP2R…
Disease	C1535926	Neurodevelopmental Disorders	DisGeNET BeFree	3.985E-33	2.468E-29	6.170E-30	5.744E-29	57	485	MYT1L,GABRB2,GABRB3,SOX11,KDM5B,MAPT,TSPYL2,ASH1L,CHD2,POGZ,BCL11A,KDM6B,KMT2E,PTEN,TRIP12,GFAP,PHF21A,SYNGAP1,PRR12,ARID1B,NTNG2,STXBP1,NRXN1,SCN1A,SCN2A,KCNMA1,KCNQ2,KCNQ3,TAOK1,TLK2,CACNA1E,TCF4,TCF7L2,DEAF1,ANK3,FOXP2,DLGAP4,DYRK1A,NTNG1,GRIA2,CHD8,GRIN2B,LRRC4C,CREBBP,SHANK3,SHANK2,SETD5,MACROD2,ANKRD11,SMARCC2,FOXP1,RORB,ELN,CTNNB1,TBR1,MBD5,RAI1
Disease	C0004352	Autistic Disorder	DisGeNET BeFree	1.372E-25	8.497E-22	1.699E-22	1.582E-21	64	864	MYT1L,CHL1,GABRB2,GABRB3,DLGAP2,KDM5B,CELF4,VWA8,MARK1,POGZ,PTEN,TRIP12,GFAP,WAC,SYNGAP1,S100B,DIP2A,ARID1B,NTNG2,STXBP1,NRXN1,NEGR1,SCN1A,SCN2A,KCNQ2,CACNA1H,TESC,DYNC1H1,DNMT3A,SHANK1,VLDLR,TCF4,DPYSL2,DRD2,DEAF1,ANK2,ANK3,DSCAM,FOXP2,DLGAP4,DYRK1A,NSD1,NTNG1,GRIA2,CHD8,NLGN1,GRIN2B,LRRC4C,ADNP,TBL1XR1,CREBBP,SHANK3,PPP2R5D,SHANK2,MACROD2,ANKRD11,FOXP1,PAX3,ELN,CTNNB1,TBR1,MBD5,RAI1,HDLBP
Disease	C0524528	Pervasive Development Disorder	DisGeNET BeFree	6.059E-23	3.753E-19	6.255E-20	5.823E-19	39	328	GABRB3,SPAST,MAPT,CHD2,POGZ,PTEN,LRRC4,GFAP,PHF21A,KMT2C,S100B,ARID1B,NRXN1,SCN1A,SCN2A,NR3C2,AIM2,SHANK1,TCF4,DRD2,TCF20,ANK3,FOXP2,CHD8,NLGN1,GRIN2B,ADNP,TBL1XR1,SHANK3,SLC6A1,PPP2R5D,SHANK2,KMT5B,SETD5,MACROD2,FOXP1,CTNNB1,TBR1,MBD5
Disease	C0014544	Epilepsy	DisGeNET BeFree	3.649E-20	2.260E-16	3.229E-17	3.006E-16	65	1124	CHL1,GABRB2,GABRB3,SOX11,CELF4,SPAST,HDAC4,MAP6,MAPT,CHD2,POGZ,BCL11A,PTEN,GFAP,SYNGAP1,S100B,NTNG2,EFHC1,STXBP1,KCNQ5,NRXN1,SCN1A,SCN2A,KCNMA1,KCNQ2,KCNQ3,SPDEF,IRF2BPL,CACNA1H,FGF13,TESC,DNMT3A,CACNA1E,TCF4,DPYSL2,DPYSL3,DRD2,DEAF1,ANK2,DSCAM,FOXP2,DYRK1A,NSD1,NTNG1,GRIA2,GRIA3,CNKSR2,GRIN2B,TBL1XR1,CREBBP,SHANK3,TFPI,SLC6A1,WDR45,KANSL1,KCNQ4,LPA,FOXP1,RORB,PAX3,ELN,CTNNB1,MBD5,RAI1,GABRA6
Disease	C3714756	Intellectual Disability	DisGeNET Curated	5.703E-19	3.532E-15	4.415E-16	4.110E-15	40	447	MYT1L,CHL1,GABRB2,HDAC4,ASH1L,POGZ,BCL11A,KDM6B,KMT2E,PTEN,PHF21A,WAC,SYNGAP1,PRR12,KMT2C,NTNG2,KCNQ5,NRXN1,SCN1A,TAOK1,DYNC1H1,DNMT3A,TLK2,CACNA1E,DEAF1,TCF20,KDM5A,NSD1,GRIA2,CHD8,SIN3A,GRIN2B,MED13L,SHANK3,PPP2R5D,SHANK2,KANSL1,SMARCC2,PUM1,RAI1
Disease	C0557874	Global developmental delay	DisGeNET BeFree	5.098E-18	3.158E-14	3.508E-15	3.266E-14	45	608	GABRB3,DLGAP2,KDM5B,SPAST,HDAC4,MAPT,ASH1L,POGZ,BCL11A,KDM6B,KMT2E,PTEN,PHF21A,ARID1B,NTNG2,STXBP1,NRXN1,NTM,SCN1A,SCN2A,KCNQ2,KCNQ3,TRAF7,TCF4,TCF20,FOXP2,DYRK1A,ARFGEF2,NSD1,POU3F2,CHD8,GRIN2B,LRRC4C,MED13L,TBL1XR1,SHANK3,OPCML,WDR45,ASXL3,ANKRD11,SMARCC2,FOXP1,CTNNB1,MBD5,RAI1
Disease	C0424605	Developmental delay (disorder)	DisGeNET BeFree	1.713E-17	1.061E-13	1.061E-14	9.877E-14	42	545	GABRB3,DLGAP2,KDM5B,HDAC4,MAPT,ASH1L,POGZ,BCL11A,KDM6B,KMT2E,PTEN,PHF21A,ARID1B,STXBP1,NRXN1,NTM,SCN1A,KCNQ2,KCNQ3,TRAF7,TCF4,TCF20,FOXP2,DYRK1A,ARFGEF2,NSD1,POU3F2,CHD8,GRIN2B,LRRC4C,MED13L,TBL1XR1,SHANK3,OPCML,WDR45,ASXL3,ANKRD11,SMARCC2,FOXP1,CTNNB1,MBD5,RAI1
Disease	C0037769	West Syndrome	DisGeNET BeFree	1.578E-14	9.775E-11	8.684E-12	8.083E-11	19	113	GABRB2,GABRB3,HDAC4,CHD2,STXBP1,SCN1A,SCN2A,KCNQ2,DNMT3A,TLK2,ARFGEF2,GRIN2B,SKI,TBL1XR1,CRH,CRHR1,WDR45,CTNNB1,MBD5
Disease	C0233514	Abnormal behavior	DisGeNET BeFree	1.682E-14	1.042E-10	8.684E-12	8.083E-11	47	820	UBR1,NAT8L,CELF4,HDAC4,MAP1A,MAP6,MAPT,MARK1,ASH1L,ACTG2,PTEN,GFAP,S100B,DLGAP3,AP2S1,NRXN1,NEGR1,SCN1A,UCN,SCN2A,SYT4,TCF4,DPYSL2,DRD2,DEAF1,ANGPT1,ANK3,FOXP2,WNT5A,DYRK1A,NSD1,POU3F2,GRIN2B,SYT2,CREBBP,SHANK3,CRH,CRHR1,CCKAR,SLC6A1,SHANK2,MACROD2,LSAMP,FOXP1,ELN,OLIG2,RAI1
Disease	C0020796	Profound Mental Retardation	DisGeNET Curated	6.919E-14	4.285E-10	2.857E-11	2.659E-10	20	139	CHL1,HDAC4,KDM6B,PTEN,SYNGAP1,NRXN1,SCN1A,DYNC1H1,DNMT3A,DEAF1,KDM5A,NSD1,CHD8,SIN3A,GRIN2B,MED13L,SHANK3,SHANK2,KANSL1,RAI1
Disease	C0917816	Mental deficiency	DisGeNET Curated	6.919E-14	4.285E-10	2.857E-11	2.659E-10	20	139	CHL1,HDAC4,KDM6B,PTEN,SYNGAP1,NRXN1,SCN1A,DYNC1H1,DNMT3A,DEAF1,KDM5A,NSD1,CHD8,SIN3A,GRIN2B,MED13L,SHANK3,SHANK2,KANSL1,RAI1
Disease	C0025363	Mental Retardation, Psychosocial	DisGeNET Curated	6.919E-14	4.285E-10	2.857E-11	2.659E-10	20	139	CHL1,HDAC4,KDM6B,PTEN,SYNGAP1,NRXN1,SCN1A,DYNC1H1,DNMT3A,DEAF1,KDM5A,NSD1,CHD8,SIN3A,GRIN2B,MED13L,SHANK3,SHANK2,KANSL1,RAI1
Disease	C0004936	Mental disorders	DisGeNET BeFree	1.037E-13	6.422E-10	4.014E-11	3.736E-10	44	763	GABRB2,SPAST,HDAC4,MAP1A,MAP6,MARK1,ACTG2,IRF6,PAGR1,PTEN,GFAP,S100B,NRXN1,NEGR1,SCN1A,UCN,SCN2A,KCNMA1,SYT4,NR3C2,VLDLR,TCF4,DPYSL2,DRD2,DEAF1,ANK3,FOXP2,CALM2,CALM3,DYRK1A,POU3F2,GRIN2B,SYT2,CREBBP,SHANK3,CRH,CRHR1,CCKAR,SHANK2,MACROD2,LSAMP,FOXP1,OLIG2,RAI1
Disease	C0025362	Mental Retardation	DisGeNET BeFree	1.166E-13	7.220E-10	4.247E-11	3.954E-10	35	493	CHL1,UBR1,SPAST,MAPT,PTEN,WAC,SYNGAP1,STXBP1,NRXN1,UCN,SCN2A,KCNQ2,FGF13,TESC,DYNC1H1,VLDLR,TCF4,DSCAM,FOXP2,NXPH1,DYRK1A,NSD1,GRIA3,POU3F4,NLGN1,GRIN2B,MED13L,ADNP,CREBBP,SHANK3,SHANK2,MACROD2,FOXP1,PAX3,ELN
Disease	C0086237	Epilepsy, Cryptogenic	DisGeNET Curated	1.732E-13	1.073E-9	5.363E-11	4.992E-10	16	82	GABRB2,GABRB3,CHD2,GFAP,SYNGAP1,ARID1B,STXBP1,SCN1A,SCN2A,KCNQ2,DYRK1A,GRIN2B,SLC6A1,WDR45,ASXL3,ANKRD11
Disease	C0751111	Awakening Epilepsy	DisGeNET Curated	1.732E-13	1.073E-9	5.363E-11	4.992E-10	16	82	GABRB2,GABRB3,CHD2,GFAP,SYNGAP1,ARID1B,STXBP1,SCN1A,SCN2A,KCNQ2,DYRK1A,GRIN2B,SLC6A1,WDR45,ASXL3,ANKRD11
Disease	C0236018	Aura	DisGeNET Curated	1.732E-13	1.073E-9	5.363E-11	4.992E-10	16	82	GABRB2,GABRB3,CHD2,GFAP,SYNGAP1,ARID1B,STXBP1,SCN1A,SCN2A,KCNQ2,DYRK1A,GRIN2B,SLC6A1,WDR45,ASXL3,ANKRD11
Disease	C1510586	Autism Spectrum Disorders	DisGeNET Curated	3.128E-13	1.938E-9	9.226E-11	8.588E-10	16	85	MYT1L,GABRB3,CHD2,TRIP12,DIP2A,NRXN1,SCN1A,TBL1X,DNMT3A,CHD8,SIN3A,GRIN2B,SHANK3,ANKRD11,FOXP1,RAI1
Disease	C0008073	Developmental Disabilities	DisGeNET BeFree	5.725E-13	3.546E-9	1.612E-10	1.500E-9	28	331	SOX11,KDM5B,PTEN,SYNGAP1,FZD1,KMT2C,ARID1B,NRXN1,SCN2A,EIF2S2,KCNMA1,KCNQ3,DNMT3A,CACNA1E,TCF4,FOXP2,DYRK1A,GRIN2B,MED13L,TBL1XR1,CREBBP,SHANK3,PDLIM1,KMT5B,ELN,CTNNB1,PUM1,RAI1
Disease	C0004352	Autistic Disorder	DisGeNET Curated	6.666E-13	4.129E-9	1.795E-10	1.671E-9	25	261	GABRB3,DLGAP2,KDM5B,VWA8,MARK1,KMT2E,PTEN,SYNGAP1,NRXN1,KCNMA1,CACNA1H,SHANK1,VLDLR,FOXP2,NSD1,CHD8,NLGN1,GRIN2B,ADNP,TBL1XR1,SHANK3,SHANK2,MACROD2,TBR1,HDLBP
Disease	C0036341	Schizophrenia	DisGeNET Curated	1.002E-12	6.207E-9	2.586E-10	2.407E-9	46	883	MYT1L,CHL1,GABRB2,GABRB3,DLGAP2,DLGAP1,HDAC4,MAP6,BCL11A,MDH1,GFAP,SYNGAP1,CKB,S100B,NTNG2,STXBP1,NRXN1,KCNQ2,KCNQ3,PPP1R9B,SHANK1,VLDLR,TCF4,DRD2,TCF7L2,ANK3,FOXP2,NTNG1,GRIA2,GRIA3,GRIK5,NLGN1,GRIN2B,ADNP,SHANK3,CRH,OPCML,CCKAR,SLC6A1,MSRA,LSAMP,CTNNB1,OLIG2,MYO16,RAI1,GABRA6
Disease	C0338656	Impaired cognition	DisGeNET BeFree	4.271E-12	2.646E-8	1.058E-9	9.850E-9	58	1368	CHL1,SPAST,HDAC4,MAPT,MFHAS1,ACTG2,SRPK2,BCL11A,GIGYF1,PTEN,LYST,GFAP,F12,SYNGAP1,S100B,DLGAP3,STXBP1,NRXN1,SCN1A,SCN2A,EIF2S2,KCNMA1,KCNQ2,PPP1R9B,NR3C2,SMPD3,MMP12,DNMT3A,SHANK1,VLDLR,TCF4,DPYSL2,DRD2,ANGPT1,ANGPT2,ANK3,FOXP2,CALM2,CALM3,WNT5A,DLGAP4,DYRK1A,GRIA2,GRIN2B,ADNP,TBL1XR1,CREBBP,COA8,SHANK3,CRH,CRHR1,TFPI,WDR45,SHANK2,ANKRD11,FOXP1,CTNNB1,OLIG2
Disease	C0005586	Bipolar Disorder	DisGeNET Curated	6.363E-12	3.941E-8	1.516E-9	1.411E-8	32	477	GABRB2,GABRB3,SRPK2,ARNTL2,GFAP,S100B,NTNG2,NRXN1,SCN2A,KCNQ2,KCNQ3,WHRN,TCF4,DPYSL2,DRD2,TCF7L2,ANK3,DSCAM,CALM2,NTNG1,GRIA2,GRIA3,POU3F2,GRIK5,NLGN1,GRIN2B,RFX4,CRH,CRHR1,CCKAR,SHANK2,MBD5
Disease	C0014544	Epilepsy	DisGeNET Curated	1.685E-11	1.044E-7	3.866E-9	3.599E-8	16	109	GABRB2,GABRB3,CHD2,GFAP,SYNGAP1,ARID1B,STXBP1,SCN1A,SCN2A,KCNQ2,DYRK1A,GRIN2B,SLC6A1,WDR45,ASXL3,ANKRD11
Disease	C3887898	Infantile Spasm	DisGeNET BeFree	2.300E-11	1.425E-7	5.088E-9	4.736E-8	14	79	GABRB2,GABRB3,HDAC4,STXBP1,SCN1A,SCN2A,KCNQ2,GRIN2B,SKI,CRH,CRHR1,WDR45,CTNNB1,MBD5
Disease	C0085584	Encephalopathies	DisGeNET BeFree	2.598E-11	1.609E-7	5.549E-9	5.165E-8	26	334	GABRB3,CHD2,BCL11A,MDH1,GFAP,S100B,NTNG2,STXBP1,KCNQ5,SCN1A,UCN,SCN2A,EIF2S2,KCNQ2,KCNQ3,IRF2BPL,TESC,DYNC1H1,DNMT3A,ANGPT1,ANGPT2,NTNG1,CNKSR2,GRIN2B,SLC6A1,WDR45
Disease	C0036572	Seizures	DisGeNET BeFree	3.373E-11	2.089E-7	6.964E-9	6.482E-8	48	1052	GABRB3,HDAC4,MAPT,SRPK2,CHD2,PTEN,LYST,GFAP,SYNGAP1,S100B,EFHC1,STXBP1,KCNQ5,NRXN1,SCN1A,SCN2A,KCNMA1,KCNQ2,KCNQ3,SPDEF,CACNA1H,FGF13,TESC,MMP12,VLDLR,TCF4,DRD2,ANGPT1,ANGPT2,ANK2,DYRK1A,NSD1,GRIA2,CHD8,CNKSR2,GRIN2B,SKI,SHANK3,CRH,SLC6A1,WDR45,KANSL1,LPA,UCN3,CTNNB1,MBD5,PUM1,MYO16
Disease	C0000768	Congenital Abnormality	DisGeNET BeFree	3.554E-11	2.202E-7	7.102E-9	6.611E-8	49	1091	SOX11,HDAC4,TSPYL2,SYT9,IRF6,FOXN3,PTEN,PTK7,SYNGAP1,ARID1B,NTNG2,STXBP1,NRXN1,SCN1A,WNT3A,KCNMA1,TESC,DYNC1H1,RAD51C,VLDLR,TCF4,ANGPT2,FOXP2,PTBP2,WNT3,WNT5A,NXPH1,DYRK1A,ARFGEF2,PORCN,POU3F4,CHD8,SIN3A,MED13L,SKI,TEK,TBL1XR1,CREBBP,SHANK3,CRH,CORO1A,KANSL1,ANKRD11,PAX3,ELN,VGLL4,CTNNB1,TBR1,RAI1
Disease	C0432072	Dysmorphic features	DisGeNET BeFree	8.623E-11	5.341E-7	1.669E-8	1.554E-7	17	140	SOX11,IRF6,KDM6B,ARID1B,NRXN1,VLDLR,TCF4,TCF20,NSD1,MED13L,TBL1XR1,PPP2R5D,SETD5,ASXL3,FOXP1,ELN,MBD5
Disease	C0036857	Severe intellectual disability	DisGeNET BeFree	7.889E-10	4.887E-6	1.481E-7	1.378E-6	17	161	ASH1L,SYNGAP1,ARID1B,STXBP1,NRXN1,SCN1A,SCN2A,DYNC1H1,TCF4,MED13L,ADNP,SHANK3,SHANK2,ASXL3,FOXP1,CTNNB1,MBD5
Disease	C4505072	Epileptic Syndromes	DisGeNET BeFree	2.115E-9	1.310E-5	3.854E-7	3.587E-6	10	46	GABRB3,MAP6,LRRC4,EFHC1,STXBP1,SCN1A,SCN2A,KCNQ2,KCNQ3,CACNA1H
Disease	C0543888	Epileptic encephalopathy	DisGeNET BeFree	3.192E-9	1.977E-5	5.648E-7	5.258E-6	15	133	GABRB3,CHD2,BCL11A,STXBP1,KCNQ5,SCN1A,SCN2A,KCNQ2,KCNQ3,IRF2BPL,CACNA1E,GRIN2B,SLC6A1,WDR45,MBD5
Disease	C0005586	Bipolar Disorder	DisGeNET BeFree	1.234E-8	7.642E-5	2.123E-6	1.976E-5	38	863	CHL1,GABRB2,GABRB3,VWA8,GFAP,FZD7,S100B,NTNG2,NRXN1,KCNQ2,KCNQ3,NR3C2,WHRN,TCF4,DPYSL2,DRD2,TCF7L2,ANK3,DSCAM,CALM2,CALM3,PKP4,NTNG1,GRIA2,GRIA3,POU3F2,NLGN1,GRIN2B,LRRC4C,CAV2,RFX4,SHANK3,CRH,CRHR1,CCKAR,RORB,CTNNB1,MBD5
Disease	C0266617	Congenital anomaly of face	DisGeNET BeFree	1.306E-8	8.090E-5	2.186E-6	2.035E-5	13	106	HDAC4,MAPT,POGZ,TRIP12,WAC,STXBP1,TCF4,MED13L,CREBBP,PDLIM1,SETD5,ANKRD11,PAX3
Disease	C0026106	Mild Mental Retardation	DisGeNET BeFree	1.831E-8	1.134E-4	2.985E-6	2.779E-5	12	90	TSPYL2,CHD2,PTEN,SHANK1,TCF4,CNKSR2,SIN3A,CREBBP,SHANK3,SHANK2,SETD5,RORB
Disease	C0014548	Epilepsy, Generalized	DisGeNET BeFree	1.959E-8	1.213E-4	3.040E-6	2.830E-5	11	73	GABRB3,CHD2,SYNGAP1,SCN1A,SCN2A,KCNMA1,KCNQ2,KCNQ3,CACNA1H,SLC6A1,RORB
Disease	C0241210	Speech Delay	DisGeNET BeFree	1.963E-8	1.216E-4	3.040E-6	2.830E-5	9	43	MYT1L,NRXN1,FOXP2,DYRK1A,MED13L,SHANK3,KANSL1,ASXL3,FOXP1
Disease	C0003469	Anxiety Disorders	DisGeNET BeFree	2.224E-8	1.378E-4	3.360E-6	3.128E-5	36	807	HDAC4,MAP6,IRF6,PAGR1,KDM6B,GFAP,PTK7,S100B,DLGAP3,SCN1A,UCN,PPP1R9B,NR3C2,MMP12,TSACC,SHANK1,DPYSL2,DRD2,ANGPT2,ANK3,CALM2,CALM3,DYRK1A,GRIA2,GRIN2B,CRH,CRHR1,CCKAR,CCKBR,SLC6A1,LPA,LSAMP,UCN3,CTNNB1,MBD5,GABRA6
Disease	C0494475	Tonic - clonic seizures	DisGeNET BeFree	3.000E-8	1.858E-4	4.425E-6	4.119E-5	9	45	MANBA,EFHC1,SCN1A,SCN2A,SCN4B,KCNQ2,KCNQ3,SHANK3,CCKBR
Disease	C0751495	Seizures, Focal	DisGeNET BeFree	3.561E-8	2.206E-4	5.129E-6	4.775E-5	8	33	PTEN,S100B,STXBP1,SCN1A,SCN2A,KCNQ2,KCNQ3,WDR45
Disease	C0014553	Absence Epilepsy	DisGeNET BeFree	5.227E-8	3.238E-4	7.358E-6	6.850E-5	11	80	GABRB3,GFAP,EFHC1,SCN1A,KCNQ3,CACNA1H,DYRK1A,GRIA2,SLC6A1,RORB,GABRA6
Disease	C1842981	NEUROTICISM	DisGeNET BeFree	5.542E-8	3.433E-4	7.629E-6	7.101E-5	14	141	MFHAS1,ASH1L,BLK,SPDEF,NR3C2,DRD2,DYRK1A,GRIN2B,XKR6,CRHR1,TFPI,MSRA,KANSL1,GABRA6
Disease	C0159020	Convulsions in the newborn	DisGeNET BeFree	1.054E-7	6.530E-4	1.420E-5	1.321E-4	6	16	STXBP1,KCNQ5,SCN1A,SCN2A,KCNQ2,KCNQ3
Disease	C1852581	EPILEPSY, BENIGN NEONATAL, 2	DisGeNET BeFree	1.155E-7	7.153E-4	1.490E-5	1.387E-4	5	9	SCN1A,SCN2A,KCNQ2,KCNQ3,KCNQ4
Disease	C3889476	Benign Familial Convulsion	DisGeNET BeFree	1.155E-7	7.153E-4	1.490E-5	1.387E-4	5	9	SCN1A,SCN2A,KCNQ2,KCNQ3,KCNQ4
Disease	C0038443	Stress, Psychological	DisGeNET BeFree	1.221E-7	7.565E-4	1.544E-5	1.437E-4	16	199	IRF6,SSR2,KDM6B,TRIP12,UCN,NR3C2,DRD2,ANK3,CALM2,CALM3,GRIA3,GRIN2B,CRH,CRHR1,TFPI,GABRA6
Disease	C0003467	Anxiety	DisGeNET BeFree	1.315E-7	8.148E-4	1.630E-5	1.517E-4	33	752	HDAC4,MAP6,IRF6,PAGR1,KDM6B,GFAP,PTK7,S100B,DLGAP3,UCN,PPP1R9B,NR3C2,MMP12,TSACC,SHANK1,DPYSL2,DRD2,ANGPT2,ANK3,CALM2,CALM3,DYRK1A,GRIA2,CRH,CRHR1,CCKAR,CCKBR,SLC6A1,LPA,UCN3,CTNNB1,MBD5,GABRA6
Disease	C0023015	Language Disorders	DisGeNET BeFree	2.202E-7	1.364E-3	2.674E-5	2.489E-4	9	56	CELF4,MAPT,DRD2,FOXP2,GRIN2B,MED13L,SHANK3,SHANK2,FOXP1
Disease	C0221355	Macrocephaly	DisGeNET BeFree	3.909E-7	2.421E-3	4.482E-5	4.173E-4	11	97	PTEN,GFAP,STXBP1,NTM,DNMT3A,DYRK1A,NSD1,CHD8,PPP2R5D,ASXL3,ASXL2
Disease	C0454655	Semantic-Pragmatic Disorder	DisGeNET Curated	4.125E-7	2.555E-3	4.482E-5	4.173E-4	5	11	BCL11A,PTEN,NRXN1,FOXP2,SHANK3
Disease	C0023012	Language Delay	DisGeNET Curated	4.125E-7	2.555E-3	4.482E-5	4.173E-4	5	11	BCL11A,PTEN,NRXN1,FOXP2,SHANK3
Disease	C0023014	Language Development Disorders	DisGeNET Curated	4.125E-7	2.555E-3	4.482E-5	4.173E-4	5	11	BCL11A,PTEN,NRXN1,FOXP2,SHANK3
Disease	C0241210	Speech Delay	DisGeNET Curated	4.125E-7	2.555E-3	4.482E-5	4.173E-4	5	11	BCL11A,PTEN,NRXN1,FOXP2,SHANK3
Disease	C0751257	Auditory Processing Disorder, Central	DisGeNET Curated	4.125E-7	2.555E-3	4.482E-5	4.173E-4	5	11	BCL11A,PTEN,NRXN1,FOXP2,SHANK3
Disease	C0016667	Fragile X Syndrome	DisGeNET BeFree	4.711E-7	2.918E-3	5.031E-5	4.683E-4	15	193	IRF6,PTEN,STXBP1,NRXN1,SCN2A,KCNQ2,SHANK1,DSCAM,PKP4,GRIA2,SKI,CRHR1,PAX3,MBD5,RAI1
Disease	C0011570	Mental Depression	DisGeNET Curated	6.768E-7	4.192E-3	7.106E-5	6.614E-4	17	254	GABRB3,HDAC4,GFAP,S100B,NRXN1,UCN,NR3C2,DPYSL2,DRD2,DEAF1,CALM2,GRIA3,GRIN2B,CRH,CRHR1,SLC6A1,GABRA6
Disease	C0009241	Cognition Disorders	DisGeNET BeFree	7.182E-7	4.449E-3	7.414E-5	6.902E-4	27	584	CHL1,MAPT,PTEN,GFAP,SYNGAP1,S100B,NRXN1,SCN1A,SCN2A,EIF2S2,KCNQ2,SMPD3,VLDLR,TCF4,DRD2,ANGPT1,ANK3,FOXP2,DYRK1A,GRIA2,GRIN2B,MED13L,ADNP,CREBBP,NCOA1,FOXP1,OLIG2
Disease	C0376634	Craniofacial Abnormalities	DisGeNET Curated	1.260E-6	7.804E-3	1.279E-4	1.191E-3	13	156	GABRB3,IRF6,PTEN,NRXN1,DNMT3A,TCF4,FOXP2,SIN3A,SKI,KANSL1,PAX3,CTNNB1,RAI1
Disease	C0233794	Memory impairment	DisGeNET BeFree	1.679E-6	1.040E-2	1.677E-4	1.561E-3	28	648	KCNMB2,HDAC4,MAPT,SRPK2,CHD2,PTEN,LRRC4,GFAP,S100B,NTNG2,SCN2A,EIF2S2,NR3C2,DNMT3A,SHANK1,DPYSL2,DRD2,DEAF1,ANK3,DYRK1A,GRIA2,NLGN1,GRIN2B,CREBBP,CRHR1,SHANK2,PPP5C,CTNNB1
Disease	C1853490	22q13.3 Deletion Syndrome	DisGeNET BeFree	1.719E-6	1.065E-2	1.690E-4	1.573E-3	5	14	SHANK1,SHANK3,SHANK2,KANSL1,MBD5
Disease	C0270850	Idiopathic generalized epilepsy	DisGeNET BeFree	1.779E-6	1.102E-2	1.721E-4	1.602E-3	10	91	GABRB3,SYNGAP1,EFHC1,NRXN1,SCN1A,SCN2A,KCNQ2,KCNQ3,CACNA1H,GABRA6
Disease	C0856975	Autistic behavior	DisGeNET BeFree	1.935E-6	1.199E-2	1.844E-4	1.717E-3	7	38	GABRB3,PTEN,NRXN1,SCN1A,TCF4,TBL1XR1,SHANK3
Disease	C0041696	Unipolar Depression	DisGeNET BeFree	2.242E-6	1.389E-2	2.105E-4	1.959E-3	24	510	MYT1L,NAT8L,GFAP,S100B,NEGR1,NTM,UCN,FGF13,NR3C2,TESC,VLDLR,TCF4,DRD2,DEAF1,ANK3,FOXP2,GRIA2,GRIA3,GRIN2B,CREBBP,CRH,CRHR1,LSAMP,GABRA6
Disease	C0006012	Borderline Personality Disorder	DisGeNET BeFree	2.456E-6	1.521E-2	2.270E-4	2.113E-3	15	220	GABRB2,GFAP,SCN4B,KCNQ2,KCNQ3,NR3C2,SHANK1,CACNA1E,DPYSL2,DRD2,ANGPT1,ANK3,CRH,CRHR1,SHANK2
Disease	C1839333	EPILEPTIC ENCEPHALOPATHY, EARLY INFANTILE, 2	DisGeNET BeFree	3.047E-6	1.887E-2	2.776E-4	2.584E-3	8	57	GABRB3,HDAC4,CHD2,STXBP1,SCN1A,SCN2A,KCNQ2,KCNQ3
Disease	C0751265	Learning Disabilities	DisGeNET BeFree	3.138E-6	1.944E-2	2.817E-4	2.622E-3	9	76	MAPT,PTEN,TRIP12,AP2S1,DYNC1H1,FOXP2,CALM2,CALM3,TBL1XR1
Disease	C1527366	Salaam Seizures	DisGeNET BeFree	3.654E-6	2.263E-2	3.233E-4	3.010E-3	5	16	STXBP1,SHANK3,CRH,CRHR1,WDR45
Disease	C0035372	Rett Syndrome	DisGeNET BeFree	3.812E-6	2.361E-2	3.326E-4	3.096E-3	15	228	GABRB3,GFAP,NTNG2,STXBP1,SCN1A,DYNC1H1,TCF4,NTNG1,GRIA2,GRIN2B,TBL1XR1,CREBBP,SHANK3,WDR45,MBD5
Disease	C0338831	Manic	DisGeNET Curated	3.907E-6	2.420E-2	3.362E-4	3.129E-3	9	78	SRPK2,S100B,NTNG2,SCN2A,ANK3,NTNG1,POU3F2,SHANK3,SHANK2
Disease	cv:C2750892	Epilepsy, juvenile absence, susceptibility to, 1	Clinical Variations	4.000E-6	2.478E-2	3.394E-4	3.159E-3	3	3	GABRB3,EFHC1,CACNA1H
Disease	C0010606	Adenoid Cystic Carcinoma	DisGeNET Curated	4.226E-6	2.617E-2	3.537E-4	3.293E-3	10	100	SOX11,BCL11A,KDM6B,PTEN,WNT5B,KMT2C,FOXP2,NSD1,CREBBP,KANSL1
Disease	C1857276	Trichohepatoenteric Syndrome	DisGeNET BeFree	4.478E-6	2.773E-2	3.698E-4	3.442E-3	21	424	UBR1,MAP6,ACTG2,PTEN,LYST,SCN1A,KCNQ2,NR3C2,DRD2,NSD1,PORCN,SKI,ADNP,CREBBP,SHANK3,TFPI,KANSL1,FOXP1,ELN,CTNNB1,RAI1
Disease	C0025958	Microcephaly	DisGeNET BeFree	4.813E-6	2.981E-2	3.922E-4	3.651E-3	19	358	SOX11,BCL11A,PTEN,NRXN1,SCN2A,SMPD3,ADGRL2,TLK2,DEAF1,FOXP2,DYRK1A,ARFGEF2,NSD1,CHD8,CREBBP,ASXL3,CTNNB1,MBD5,MYO16
Disease	C1279420	Anxiety neurosis (finding)	DisGeNET Curated	5.418E-6	3.356E-2	4.248E-4	3.954E-3	7	44	MAPT,UCN,SHANK1,DRD2,CRH,CRHR1,RAI1
Disease	C0003469	Anxiety Disorders	DisGeNET Curated	5.418E-6	3.356E-2	4.248E-4	3.954E-3	7	44	MAPT,UCN,SHANK1,DRD2,CRH,CRHR1,RAI1
Disease	C0376280	Anxiety States, Neurotic	DisGeNET Curated	5.418E-6	3.356E-2	4.248E-4	3.954E-3	7	44	MAPT,UCN,SHANK1,DRD2,CRH,CRHR1,RAI1

## Sheet: 176 non-ASD genes
Category	ID	Name	Source	p-value	q-value Bonferroni	q-value FDR B&H	q-value FDR B&Y	Hit Count in Query List	Hit Count in Genome	Hit in Query List
GO: Molecular Function	GO:0001786	phosphatidylserine binding		4.957E-9	2.508E-6	1.461E-6	9.945E-6	9	64	MARK1,SYTL2,SYT9,SYT2,SYT7,SYT4,SYT5,SMPD3,SYT13
GO: Molecular Function	GO:0019904	protein domain specific binding		5.777E-9	2.923E-6	1.461E-6	9.945E-6	28	895	SHANK1,MPP3,WHRN,DLGAP2,DLGAP1,DPYSL3,AKAP5,CALM2,CALM3,WNT5A,DLGAP4,APBA1,GRIA3,GRIK5,NLGN1,SSTR2,FOXA1,FZD1,FZD7,DLGAP3,LPA,WNT3A,PAX3,TRAK2,ADGRL2,OLIG2,SNTA1,TBL1X
GO: Molecular Function	GO:0030165	PDZ domain binding		1.258E-8	6.363E-6	2.121E-6	1.443E-5	11	123	MPP3,APBA1,GRIA3,GRIK5,NLGN1,SSTR2,FZD1,FZD7,DLGAP3,ADGRL2,SNTA1
GO: Molecular Function	GO:0072341	modified amino acid binding		7.413E-7	3.751E-4	9.377E-5	6.381E-4	9	113	MARK1,SYTL2,SYT9,SYT2,SYT7,SYT4,SYT5,SMPD3,SYT13
GO: Molecular Function	GO:1902936	phosphatidylinositol bisphosphate binding		1.231E-6	6.231E-4	1.045E-4	7.109E-4	9	120	MARK1,SYTL2,APBA1,SYT9,SYT7,TULP1,FZD7,WDR45,SYT5
GO: Molecular Function	GO:0005544	calcium-dependent phospholipid binding		1.239E-6	6.268E-4	1.045E-4	7.109E-4	7	62	SYT9,SYT2,SYT7,SYTL3,SYT4,SYT5,SYT13
GO: Molecular Function	GO:0001664	G protein-coupled receptor binding		1.572E-6	7.953E-4	1.136E-4	7.731E-4	14	331	SHANK1,AKAP5,CALM2,CALM3,MARK1,WNT5A,CAV2,CRH,CCKBR,FZD1,FZD7,UCN,WNT3A,UCN3
GO: Molecular Function	GO:0005546	phosphatidylinositol-4,5-bisphosphate binding		2.039E-6	1.032E-3	1.290E-4	8.777E-4	8	95	MARK1,SYTL2,APBA1,SYT9,SYT7,TULP1,FZD7,SYT5
GO: Molecular Function	GO:0051431	corticotropin-releasing hormone receptor 2 binding		2.716E-6	1.374E-3	1.527E-4	1.039E-3	3	4	CRH,UCN,UCN3
GO: Molecular Function	GO:0042043	neurexin family protein binding		9.965E-6	5.042E-3	5.042E-4	3.431E-3	4	16	SYTL2,NLGN1,SYTL3,SYTL1
GO: Molecular Function	GO:0051429	corticotropin-releasing hormone receptor binding		1.340E-5	6.781E-3	6.164E-4	4.195E-3	3	6	CRH,UCN,UCN3
GO: Molecular Function	GO:0005102	signaling receptor binding		1.512E-5	7.653E-3	6.377E-4	4.339E-3	36	1945	SHANK1,DRD2,AKAP5,ANGPT1,ANGPT2,CALM2,CALM3,MARK1,IL36A,WNT5A,NXPH1,SYTL2,ARFGEF2,LRRC4B,PAGR1,NLGN1,CAV2,ANGPTL1,CRH,CCKBR,FZD1,FZD7,LHB,S100B,SYTL3,LPA,ANGPT4,UCN,WNT3A,UCN3,FGF13,ASXL2,GRIP2,TRAK2,SYTL1,NXPH3
GO: Molecular Function	GO:0071855	neuropeptide receptor binding		2.324E-5	1.176E-2	9.046E-4	6.155E-3	5	39	SHANK1,CRH,CCKBR,UCN,UCN3
GO: Molecular Function	GO:0035254	glutamate receptor binding		3.637E-5	1.840E-2	1.314E-3	8.944E-3	6	70	SHANK1,DRD2,AKAP5,CALM2,CALM3,GRIP2
GO: Molecular Function	GO:0030276	clathrin binding		4.270E-5	2.161E-2	1.441E-3	9.803E-3	6	72	SYT9,SYT2,SYT7,SYT4,SYT5,SYT13
GO: Molecular Function	GO:1901981	phosphatidylinositol phosphate binding		5.749E-5	2.909E-2	1.818E-3	1.237E-2	9	193	MARK1,SYTL2,APBA1,SYT9,SYT7,TULP1,FZD7,WDR45,SYT5
GO: Molecular Function	GO:0005543	phospholipid binding		6.620E-5	3.350E-2	1.970E-3	1.341E-2	15	522	MARK1,WNT5A,SYTL2,APBA1,SYT9,SYT2,SYT7,TULP1,FZD7,WDR45,SYTL3,SYT4,SYT5,SMPD3,SYT13
GO: Molecular Function	GO:0097110	scaffold protein binding		7.748E-5	3.920E-2	2.096E-3	1.427E-2	6	80	SHANK1,AKAP5,NLGN1,CAV2,DLGAP3,CACNA1H
GO: Molecular Function	GO:0004951	cholecystokinin receptor activity		7.872E-5	3.983E-2	2.096E-3	1.427E-2	2	2	CCKAR,CCKBR
GO: Biological Process	GO:0098916	anterograde trans-synaptic signaling		1.693E-13	6.497E-10	2.787E-10	2.461E-9	37	1076	SHANK1,KCNMB2,NAT8L,DLGAP2,DLGAP1,DRD2,AKAP5,ANK3,CALM2,CALM3,DLGAP4,APBA1,SYT9,NTNG1,GRIK5,NLGN1,SYT2,CAV2,LRRC4,SYT7,CRH,CCKBR,S100B,DLGAP3,NTNG2,CAMK2N1,KCNQ4,LPA,UCN,WNT3A,KCNMB1,KCNQ2,SYT4,SYT5,CACNA1H,GRIP2,GABRA6
GO: Biological Process	GO:0007268	chemical synaptic transmission		1.693E-13	6.497E-10	2.787E-10	2.461E-9	37	1076	SHANK1,KCNMB2,NAT8L,DLGAP2,DLGAP1,DRD2,AKAP5,ANK3,CALM2,CALM3,DLGAP4,APBA1,SYT9,NTNG1,GRIK5,NLGN1,SYT2,CAV2,LRRC4,SYT7,CRH,CCKBR,S100B,DLGAP3,NTNG2,CAMK2N1,KCNQ4,LPA,UCN,WNT3A,KCNMB1,KCNQ2,SYT4,SYT5,CACNA1H,GRIP2,GABRA6
GO: Biological Process	GO:0099537	trans-synaptic signaling		2.179E-13	8.362E-10	2.787E-10	2.461E-9	37	1085	SHANK1,KCNMB2,NAT8L,DLGAP2,DLGAP1,DRD2,AKAP5,ANK3,CALM2,CALM3,DLGAP4,APBA1,SYT9,NTNG1,GRIK5,NLGN1,SYT2,CAV2,LRRC4,SYT7,CRH,CCKBR,S100B,DLGAP3,NTNG2,CAMK2N1,KCNQ4,LPA,UCN,WNT3A,KCNMB1,KCNQ2,SYT4,SYT5,CACNA1H,GRIP2,GABRA6
GO: Biological Process	GO:0099536	synaptic signaling		3.995E-13	1.533E-9	3.832E-10	3.383E-9	37	1107	SHANK1,KCNMB2,NAT8L,DLGAP2,DLGAP1,DRD2,AKAP5,ANK3,CALM2,CALM3,DLGAP4,APBA1,SYT9,NTNG1,GRIK5,NLGN1,SYT2,CAV2,LRRC4,SYT7,CRH,CCKBR,S100B,DLGAP3,NTNG2,CAMK2N1,KCNQ4,LPA,UCN,WNT3A,KCNMB1,KCNQ2,SYT4,SYT5,CACNA1H,GRIP2,GABRA6
GO: Biological Process	GO:0005513	detection of calcium ion		1.534E-9	5.887E-6	1.177E-6	1.040E-5	6	15	KCNMB2,CALM2,CALM3,SYT9,SYT7,KCNMB1
GO: Biological Process	GO:0015872	dopamine transport		2.055E-9	7.884E-6	1.314E-6	1.160E-5	9	61	NAT8L,DRD2,SYT9,SYT2,SYT7,SYT4,SYT5,SMPD3,SYT13
GO: Biological Process	GO:0050804	modulation of chemical synaptic transmission		4.148E-9	1.591E-5	2.046E-6	1.807E-5	24	691	SHANK1,DLGAP2,DLGAP1,DRD2,AKAP5,CALM2,CALM3,DLGAP4,APBA1,NTNG1,GRIK5,NLGN1,LRRC4,SYT7,CRH,CCKBR,S100B,DLGAP3,NTNG2,KCNQ4,UCN,WNT3A,SYT4,GRIP2
GO: Biological Process	GO:0099177	regulation of trans-synaptic signaling		4.266E-9	1.637E-5	2.046E-6	1.807E-5	24	692	SHANK1,DLGAP2,DLGAP1,DRD2,AKAP5,CALM2,CALM3,DLGAP4,APBA1,NTNG1,GRIK5,NLGN1,LRRC4,SYT7,CRH,CCKBR,S100B,DLGAP3,NTNG2,KCNQ4,UCN,WNT3A,SYT4,GRIP2
GO: Biological Process	GO:0051937	catecholamine transport		9.224E-9	3.539E-5	3.933E-6	3.472E-5	10	97	NAT8L,DRD2,SYT9,SYT2,SYT7,CRH,SYT4,SYT5,SMPD3,SYT13
GO: Biological Process	GO:0051592	response to calcium ion		1.133E-8	4.348E-5	4.348E-6	3.839E-5	13	195	KCNMB2,CALM2,CALM3,WNT5A,SYT9,NLGN1,SYT2,SYT7,KCNMB1,SYT4,SYT5,SPAG16,SYT13
GO: Biological Process	GO:0015844	monoamine transport		4.415E-8	1.694E-4	1.540E-5	1.360E-4	10	114	NAT8L,DRD2,SYT9,SYT2,SYT7,CRH,SYT4,SYT5,SMPD3,SYT13
GO: Biological Process	GO:0023061	signal release		6.469E-8	2.482E-4	2.069E-5	1.827E-4	22	678	SOX11,DRD2,UBE2Q1,CALM2,CALM3,APBA1,SYT9,PORCN,GRIK5,NLGN1,SYT2,SYT7,CRH,CCKAR,CCKBR,CAMK2N1,UCN,SYT4,SYT5,UCN3,SMPD3,SYT13
GO: Biological Process	GO:0050808	synapse organization		9.088E-8	3.487E-4	2.354E-5	2.078E-4	20	576	SHANK1,DLGAP1,DRD2,ANK3,WNT5A,ADGRB2,NTNG1,LRRC4B,CNKSR2,NLGN1,LRRC4,ADD2,FZD1,DLGAP3,NTNG2,WNT3A,FGF13,GRIP2,ADGRL2,SNTA1
GO: Biological Process	GO:0014059	regulation of dopamine secretion		9.202E-8	3.531E-4	2.354E-5	2.078E-4	7	45	DRD2,SYT9,SYT2,SYT7,SYT4,SYT5,SYT13
GO: Biological Process	GO:0014046	dopamine secretion		9.202E-8	3.531E-4	2.354E-5	2.078E-4	7	45	DRD2,SYT9,SYT2,SYT7,SYT4,SYT5,SYT13
GO: Biological Process	GO:0016079	synaptic vesicle exocytosis		1.011E-7	3.880E-4	2.425E-5	2.141E-4	11	158	DRD2,CALM2,CALM3,APBA1,SYT9,GRIK5,NLGN1,SYT2,SYT7,SYT4,SYT5
GO: Biological Process	GO:0007416	synapse assembly		1.081E-7	4.146E-4	2.439E-5	2.154E-4	13	236	SHANK1,DRD2,WNT5A,ADGRB2,LRRC4B,NLGN1,LRRC4,ADD2,FZD1,NTNG2,WNT3A,FGF13,ADGRL2
GO: Biological Process	GO:0051050	positive regulation of transport		1.306E-7	5.010E-4	2.741E-5	2.420E-4	29	1160	SOX11,NAT8L,DRD2,AKAP5,ANGPT1,ANK3,CALM2,CALM3,WNT5A,SYTL2,SYT9,NLGN1,SYT2,SYT7,CRH,CCKAR,TULP1,CCKBR,BAP1,CAMK2N1,UCN,WNT3A,SCN4B,KCNMB1,SYT4,CACNA1H,UCN3,TESC,SMPD3
GO: Biological Process	GO:0099003	vesicle-mediated transport in synapse		1.363E-7	5.230E-4	2.741E-5	2.420E-4	14	284	DRD2,AKAP5,CALM2,CALM3,APBA1,SYT9,GRIK5,NLGN1,SYT2,SYT7,WNT3A,SYT4,SYT5,GRIP2
GO: Biological Process	GO:0071277	cellular response to calcium ion		1.429E-7	5.482E-4	2.741E-5	2.420E-4	9	98	WNT5A,SYT9,NLGN1,SYT2,SYT7,SYT4,SYT5,SPAG16,SYT13
GO: Biological Process	GO:0050433	regulation of catecholamine secretion		2.755E-7	1.057E-3	5.034E-5	4.445E-4	8	77	DRD2,SYT9,SYT2,SYT7,CRH,SYT4,SYT5,SYT13
GO: Biological Process	GO:0017158	regulation of calcium ion-dependent exocytosis		2.954E-7	1.133E-3	5.151E-5	4.548E-4	7	53	SYT9,SYT2,SYT7,SYT4,SYT5,CACNA1H,SYT13
GO: Biological Process	GO:0050432	catecholamine secretion		3.715E-7	1.426E-3	5.967E-5	5.269E-4	8	80	DRD2,SYT9,SYT2,SYT7,CRH,SYT4,SYT5,SYT13
GO: Biological Process	GO:0010038	response to metal ion		3.732E-7	1.432E-3	5.967E-5	5.269E-4	19	571	KCNMB2,DRD2,ANK3,CALM2,CALM3,WNT5A,SYT9,GRIA3,NLGN1,SYT2,SYT7,KCNMB1,SYT4,SYT5,CACNA1H,ELN,SMPD3,SPAG16,SYT13
GO: Biological Process	GO:1903305	regulation of regulated secretory pathway		5.017E-7	1.925E-3	7.701E-5	6.800E-4	12	226	DRD2,CALM2,CALM3,APBA1,SYT9,NLGN1,SYT2,SYT7,SYT4,SYT5,CACNA1H,SYT13
GO: Biological Process	GO:0071248	cellular response to metal ion		5.286E-7	2.028E-3	7.800E-5	6.888E-4	13	271	ANK3,WNT5A,SYT9,NLGN1,SYT2,SYT7,SYT4,SYT5,CACNA1H,ELN,SMPD3,SPAG16,SYT13
GO: Biological Process	GO:0099601	regulation of neurotransmitter receptor activity		1.095E-6	4.202E-3	1.556E-4	1.374E-3	8	92	SHANK1,DLGAP2,DLGAP1,DLGAP4,GRIA3,NLGN1,CRH,DLGAP3
GO: Biological Process	GO:0007420	brain development		1.149E-6	4.410E-3	1.557E-4	1.375E-3	29	1289	SHANK1,WHRN,SOX11,VLDLR,DRD2,AKAP5,ANGPT1,GAS2L3,CALM2,CALM3,WNT5A,POU3F4,HMGCS1,PAGR1,NR6A1,SSTR2,RFX4,CRH,CCKAR,FZD1,EFHC1,ASCL2,WNT3A,SYT4,FGF13,ADGRL2,OLIG2,MYO16,TENT2
GO: Biological Process	GO:0006836	neurotransmitter transport		1.177E-6	4.517E-3	1.557E-4	1.375E-3	13	291	NAT8L,DRD2,CALM2,CALM3,APBA1,SYT9,GRIK5,NLGN1,SYT2,SYT7,SYT4,SYT5,TRAK2
GO: Biological Process	GO:0051952	regulation of amine transport		1.489E-6	5.713E-3	1.840E-4	1.625E-3	9	129	NAT8L,DRD2,SYT9,SYT2,SYT7,CRH,SYT4,SYT5,SYT13
GO: Biological Process	GO:0017157	regulation of exocytosis		1.534E-6	5.885E-3	1.840E-4	1.625E-3	13	298	DRD2,CALM2,CALM3,APBA1,SYT9,NLGN1,SYT2,SYT7,SYT4,SYT5,CACNA1H,SMPD3,SYT13
GO: Biological Process	GO:0006812	cation transport		1.535E-6	5.888E-3	1.840E-4	1.625E-3	31	1458	SHANK1,KCNMB2,NAT8L,DRD2,AKAP5,ANK3,CALM2,CALM3,SYT9,GRIA3,NLGN1,SYT2,SYT7,CRH,CCKAR,CCKBR,KCNQ5,KCNQ4,UCN,WNT3A,SCN4B,KCNMB1,KCNQ2,SYT4,SYT5,CACNA1H,FGF13,TESC,SMPD3,SNTA1,SYT13
GO: Biological Process	GO:0099504	synaptic vesicle cycle		1.791E-6	6.873E-3	2.083E-4	1.839E-3	12	255	DRD2,CALM2,CALM3,APBA1,SYT9,GRIK5,NLGN1,SYT2,SYT7,WNT3A,SYT4,SYT5
GO: Biological Process	GO:0015837	amine transport		2.313E-6	8.873E-3	2.610E-4	2.304E-3	9	136	NAT8L,DRD2,SYT9,SYT2,SYT7,CRH,SYT4,SYT5,SYT13
GO: Biological Process	GO:0043269	regulation of ion transport		3.090E-6	1.186E-2	3.388E-4	2.991E-3	33	1665	SHANK1,NAT8L,DRD2,AKAP5,ANGPT1,ANK3,CALM2,CALM3,SYTL2,SYT9,GRIA3,NLGN1,SYT2,SYT7,CRH,CCKAR,CCKBR,BAP1,CAMK2N1,KCNQ5,KCNQ4,UCN,SCN4B,KCNMB1,KCNQ2,SYT4,SYT5,CACNA1H,UCN3,FGF13,TESC,SNTA1,SYT13
GO: Biological Process	GO:0031630	regulation of synaptic vesicle fusion to presynaptic active zone membrane		3.270E-6	1.255E-2	3.405E-4	3.007E-3	4	13	SYT9,GRIK5,SYT2,SYT7
GO: Biological Process	GO:0060322	head development		3.284E-6	1.260E-2	3.405E-4	3.007E-3	29	1359	SHANK1,WHRN,SOX11,VLDLR,DRD2,AKAP5,ANGPT1,GAS2L3,CALM2,CALM3,WNT5A,POU3F4,HMGCS1,PAGR1,NR6A1,SSTR2,RFX4,CRH,CCKAR,FZD1,EFHC1,ASCL2,WNT3A,SYT4,FGF13,ADGRL2,OLIG2,MYO16,TENT2
GO: Biological Process	GO:0051047	positive regulation of secretion		3.396E-6	1.303E-2	3.429E-4	3.028E-3	15	426	SOX11,DRD2,SYTL2,SYT9,NLGN1,SYT7,CRH,CCKAR,CCKBR,CAMK2N1,UCN,SYT4,CACNA1H,UCN3,SMPD3
GO: Biological Process	GO:0099084	postsynaptic specialization organization		4.295E-6	1.648E-2	4.226E-4	3.731E-3	6	51	SHANK1,DLGAP1,LRRC4B,NLGN1,LRRC4,NTNG2
GO: Biological Process	GO:0007417	central nervous system development		4.472E-6	1.716E-2	4.289E-4	3.787E-3	33	1694	SHANK1,WHRN,SOX11,VLDLR,DRD2,AKAP5,ANGPT1,GAS2L3,CALM2,CALM3,WNT5A,POU3F4,HMGCS1,PAGR1,NR6A1,SSTR2,RFX4,LZIC,CRH,CCKAR,FZD1,S100B,EFHC1,SULF1,ASCL2,WNT3A,SYT4,FGF13,PAX3,ADGRL2,OLIG2,MYO16,TENT2
GO: Biological Process	GO:0042391	regulation of membrane potential		4.704E-6	1.805E-2	4.289E-4	3.787E-3	17	554	SHANK1,KCNMB2,DRD2,ANK3,CALM2,CALM3,GRIA3,GRIK5,NLGN1,SCN4B,KCNQ2,CACNA1H,UCN3,FGF13,GRIP2,SNTA1,GABRA6
GO: Biological Process	GO:0044057	regulation of system process		4.837E-6	1.856E-2	4.289E-4	3.787E-3	21	810	SHANK1,KCNMB2,DLGAP2,DLGAP1,DRD2,CALM2,CALM3,DLGAP4,NLGN1,SSTR2,CRH,CCKBR,S100B,DLGAP3,UCN,SCN4B,CACNA1H,FGF13,GRIP2,TNNI2,SNTA1
GO: Biological Process	GO:0099643	signal release from synapse		4.931E-6	1.892E-2	4.289E-4	3.787E-3	11	234	DRD2,CALM2,CALM3,APBA1,SYT9,GRIK5,NLGN1,SYT2,SYT7,SYT4,SYT5
GO: Biological Process	GO:0007269	neurotransmitter secretion		4.931E-6	1.892E-2	4.289E-4	3.787E-3	11	234	DRD2,CALM2,CALM3,APBA1,SYT9,GRIK5,NLGN1,SYT2,SYT7,SYT4,SYT5
GO: Biological Process	GO:0017156	calcium-ion regulated exocytosis		5.030E-6	1.930E-2	4.289E-4	3.787E-3	7	80	SYT9,SYT2,SYT7,SYT4,SYT5,CACNA1H,SYT13
GO: Biological Process	GO:1904861	excitatory synapse assembly		5.680E-6	2.179E-2	4.580E-4	4.044E-3	5	31	SHANK1,WNT5A,LRRC4B,NLGN1,LRRC4
GO: Biological Process	GO:0048014	Tie signaling pathway		5.792E-6	2.222E-2	4.580E-4	4.044E-3	3	5	ANGPT1,ANGPT2,ANGPT4
GO: Biological Process	GO:0099502	calcium-dependent activation of synaptic vesicle fusion		5.792E-6	2.222E-2	4.580E-4	4.044E-3	3	5	SYT9,SYT2,SYT7
GO: Biological Process	GO:1903532	positive regulation of secretion by cell		5.849E-6	2.244E-2	4.580E-4	4.044E-3	14	390	SOX11,DRD2,SYT9,NLGN1,SYT7,CRH,CCKAR,CCKBR,CAMK2N1,UCN,SYT4,CACNA1H,UCN3,SMPD3
GO: Biological Process	GO:0031338	regulation of vesicle fusion		6.686E-6	2.565E-2	5.131E-4	4.530E-3	5	32	SYT9,GRIK5,SYT2,SYT7,SYT4
GO: Biological Process	GO:0060627	regulation of vesicle-mediated transport		8.890E-6	3.411E-2	6.688E-4	5.906E-3	19	709	DRD2,AKAP5,ANGPT1,CALM2,CALM3,WNT5A,APBA1,SYT9,GRIK5,NLGN1,SYT2,SYT7,TULP1,WNT3A,SYT4,SYT5,CACNA1H,SMPD3,SYT13
GO: Biological Process	GO:0001505	regulation of neurotransmitter levels		1.045E-5	4.009E-2	7.645E-4	6.751E-3	12	303	NAT8L,DRD2,CALM2,CALM3,APBA1,SYT9,GRIK5,NLGN1,SYT2,SYT7,SYT4,SYT5
GO: Biological Process	GO:0099560	synaptic membrane adhesion		1.056E-5	4.052E-2	7.645E-4	6.751E-3	5	35	NTNG1,LRRC4B,NLGN1,LRRC4,NTNG2
GO: Biological Process	GO:0071241	cellular response to inorganic substance		1.093E-5	4.195E-2	7.768E-4	6.859E-3	13	357	ANK3,WNT5A,SYT9,NLGN1,SYT2,SYT7,SYT4,SYT5,CACNA1H,ELN,SMPD3,SPAG16,SYT13
GO: Biological Process	GO:0099054	presynapse assembly		1.122E-5	4.304E-2	7.825E-4	6.909E-3	6	60	WNT5A,LRRC4B,NLGN1,FZD1,NTNG2,WNT3A
GO: Biological Process	GO:0031632	positive regulation of synaptic vesicle fusion to presynaptic active zone membrane		1.151E-5	4.417E-2	7.888E-4	6.965E-3	3	6	SYT9,SYT2,SYT7
GO: Biological Process	GO:0051046	regulation of secretion		1.223E-5	4.694E-2	8.181E-4	7.224E-3	21	861	SOX11,DRD2,CALM2,CALM3,SYTL2,APBA1,SYT9,NLGN1,SYT2,SYT7,CRH,CCKAR,CCKBR,CAMK2N1,UCN,SYT4,SYT5,CACNA1H,UCN3,SMPD3,SYT13
GO: Biological Process	GO:1903530	regulation of secretion by cell		1.237E-5	4.745E-2	8.181E-4	7.224E-3	20	793	SOX11,DRD2,CALM2,CALM3,APBA1,SYT9,NLGN1,SYT2,SYT7,CRH,CCKAR,CCKBR,CAMK2N1,UCN,SYT4,SYT5,CACNA1H,UCN3,SMPD3,SYT13
GO: Cellular Component	GO:0045202	synapse		1.841E-14	7.937E-12	7.937E-12	5.273E-11	48	1662	SHANK1,WHRN,DLGAP2,DLGAP1,DPYSL3,DRD2,AKAP5,ANK3,CALM2,CALM3,WNT5A,DLGAP4,APBA1,SYT9,ARFGEF2,NTNG1,PORCN,GRIA3,LRRC4B,CNKSR2,GRIK5,NLGN1,SYT2,CAV2,LRRC4,SYT7,CRH,CCKAR,TULP1,ADD2,DLGAP3,NTNG2,CAMK2N1,LPA,UCN,WNT3A,KCNMB1,KCNQ2,SYT4,SYT5,CACNA1H,UCN3,GRIP2,ADGRL2,SNTA1,SYT13,PDZD2,GABRA6
GO: Cellular Component	GO:0043005	neuron projection		4.397E-14	1.895E-11	9.477E-12	6.297E-11	49	1768	SHANK1,CHL1,WHRN,FKBP15,DLGAP2,DPYSL3,DRD2,AKAP5,ANK3,CALM2,MAP6,CALM3,MARK1,DLGAP4,APBA1,SYT9,ARFGEF2,KIAA1549,GRIA3,LRRC4B,CNKSR2,GRIK5,NLGN1,SYT2,SSTR2,LRRC4,SYT7,CRH,CCKAR,TULP1,FZD1,DLGAP3,NTNG2,CAMK2N1,ABITRAM,KCNQ4,UCN,KCNQ2,SYT4,SYT5,CACNA1H,UCN3,FGF13,GRIP2,TRAK2,ADGRL2,SYT13,PDZD2,GABRA6
GO: Cellular Component	GO:0098978	glutamatergic synapse		4.011E-13	1.729E-10	5.763E-11	3.829E-10	26	525	SHANK1,DLGAP2,DLGAP1,DRD2,AKAP5,WNT5A,DLGAP4,APBA1,NTNG1,PORCN,GRIA3,LRRC4B,CNKSR2,GRIK5,NLGN1,LRRC4,SYT7,ADD2,DLGAP3,NTNG2,LPA,WNT3A,SYT4,CACNA1H,GRIP2,ADGRL2
GO: Cellular Component	GO:0098794	postsynapse		9.014E-11	3.885E-8	9.712E-9	6.453E-8	29	833	SHANK1,WHRN,DLGAP2,DLGAP1,DRD2,AKAP5,ANK3,WNT5A,DLGAP4,APBA1,SYT9,ARFGEF2,GRIA3,LRRC4B,CNKSR2,GRIK5,NLGN1,LRRC4,SYT7,ADD2,DLGAP3,CAMK2N1,SYT4,CACNA1H,GRIP2,ADGRL2,SNTA1,PDZD2,GABRA6
GO: Cellular Component	GO:0030424	axon		7.825E-10	3.373E-7	6.745E-8	4.482E-7	29	914	WHRN,FKBP15,DPYSL3,DRD2,ANK3,CALM2,MAP6,CALM3,SYT9,GRIA3,LRRC4B,GRIK5,SYT2,SYT7,CRH,CCKAR,TULP1,NTNG2,ABITRAM,UCN,KCNQ2,SYT4,SYT5,UCN3,FGF13,TRAK2,ADGRL2,SYT13,GABRA6
GO: Cellular Component	GO:0030425	dendrite		1.104E-9	4.760E-7	6.800E-8	4.519E-7	28	868	SHANK1,CHL1,WHRN,DLGAP2,DRD2,AKAP5,ANK3,MAP6,MARK1,DLGAP4,APBA1,SYT9,ARFGEF2,GRIA3,GRIK5,NLGN1,LRRC4,SYT7,DLGAP3,CAMK2N1,ABITRAM,UCN,SYT4,CACNA1H,FGF13,GRIP2,TRAK2,GABRA6
GO: Cellular Component	GO:0097447	dendritic tree		1.104E-9	4.760E-7	6.800E-8	4.519E-7	28	868	SHANK1,CHL1,WHRN,DLGAP2,DRD2,AKAP5,ANK3,MAP6,MARK1,DLGAP4,APBA1,SYT9,ARFGEF2,GRIA3,GRIK5,NLGN1,LRRC4,SYT7,DLGAP3,CAMK2N1,ABITRAM,UCN,SYT4,CACNA1H,FGF13,GRIP2,TRAK2,GABRA6
GO: Cellular Component	GO:0097060	synaptic membrane		1.601E-9	6.902E-7	8.627E-8	5.732E-7	21	498	SHANK1,DLGAP2,DLGAP1,DRD2,AKAP5,ANK3,APBA1,NTNG1,GRIA3,LRRC4B,CNKSR2,GRIK5,NLGN1,LRRC4,SYT7,NTNG2,CACNA1H,GRIP2,ADGRL2,SNTA1,GABRA6
GO: Cellular Component	GO:0034703	cation channel complex		2.406E-9	1.037E-6	1.152E-7	7.656E-7	15	242	SHANK1,KCNMB2,CALM2,CALM3,PORCN,GRIA3,GRIK5,NLGN1,DLGAP3,KCNQ5,KCNQ4,SCN4B,KCNMB1,KCNQ2,CACNA1H
GO: Cellular Component	GO:0036477	somatodendritic compartment		2.926E-9	1.261E-6	1.261E-7	8.379E-7	33	1226	SHANK1,CHL1,WHRN,DLGAP2,DRD2,AKAP5,ANK3,MAP6,MARK1,DLGAP4,APBA1,SYT9,ARFGEF2,GRIA3,CNKSR2,GRIK5,NLGN1,LRRC4,SYT7,CRH,S100B,DLGAP3,EFHC1,CAMK2N1,ABITRAM,UCN,SYT4,SYT5,CACNA1H,FGF13,GRIP2,TRAK2,GABRA6
GO: Cellular Component	GO:0098984	neuron to neuron synapse		4.767E-9	2.055E-6	1.868E-7	1.241E-6	20	479	SHANK1,DLGAP2,DLGAP1,DRD2,AKAP5,SYT9,ARFGEF2,GRIA3,LRRC4B,CNKSR2,GRIK5,NLGN1,LRRC4,SYT7,ADD2,DLGAP3,CAMK2N1,GRIP2,PDZD2,GABRA6
GO: Cellular Component	GO:0043197	dendritic spine		1.811E-8	7.806E-6	6.171E-7	4.100E-6	15	281	SHANK1,DLGAP2,DRD2,AKAP5,APBA1,SYT9,ARFGEF2,GRIA3,GRIK5,NLGN1,LRRC4,SYT7,DLGAP3,GRIP2,GABRA6
GO: Cellular Component	GO:0034702	ion channel complex		1.861E-8	8.022E-6	6.171E-7	4.100E-6	16	325	SHANK1,KCNMB2,CALM2,CALM3,PORCN,GRIA3,GRIK5,NLGN1,DLGAP3,KCNQ5,KCNQ4,SCN4B,KCNMB1,KCNQ2,CACNA1H,GABRA6
GO: Cellular Component	GO:0044309	neuron spine		2.186E-8	9.422E-6	6.730E-7	4.472E-6	15	285	SHANK1,DLGAP2,DRD2,AKAP5,APBA1,SYT9,ARFGEF2,GRIA3,GRIK5,NLGN1,LRRC4,SYT7,DLGAP3,GRIP2,GABRA6
GO: Cellular Component	GO:0099572	postsynaptic specialization		3.279E-8	1.413E-5	9.423E-7	6.261E-6	19	485	SHANK1,DLGAP2,DLGAP1,DRD2,AKAP5,DLGAP4,ARFGEF2,GRIA3,LRRC4B,CNKSR2,GRIK5,NLGN1,LRRC4,ADD2,DLGAP3,CAMK2N1,GRIP2,PDZD2,GABRA6
GO: Cellular Component	GO:0098793	presynapse		3.663E-8	1.579E-5	9.868E-7	6.557E-6	23	710	WHRN,DRD2,CALM2,CALM3,APBA1,SYT9,NTNG1,GRIA3,LRRC4B,GRIK5,NLGN1,SYT2,SYT7,CCKAR,TULP1,NTNG2,UCN,WNT3A,SYT4,SYT5,CACNA1H,UCN3,GABRA6
GO: Cellular Component	GO:0150034	distal axon		4.384E-8	1.890E-5	1.111E-6	7.385E-6	19	494	WHRN,FKBP15,DPYSL3,DRD2,CALM2,CALM3,SYT9,GRIA3,GRIK5,SYT2,SYT7,CCKAR,TULP1,ABITRAM,UCN,UCN3,FGF13,TRAK2,GABRA6
GO: Cellular Component	GO:0045211	postsynaptic membrane		5.012E-8	2.160E-5	1.183E-6	7.859E-6	16	349	SHANK1,DLGAP2,DLGAP1,DRD2,ANK3,GRIA3,LRRC4B,CNKSR2,GRIK5,NLGN1,LRRC4,CACNA1H,GRIP2,ADGRL2,SNTA1,GABRA6
GO: Cellular Component	GO:1902495	transmembrane transporter complex		5.214E-8	2.247E-5	1.183E-6	7.859E-6	16	350	SHANK1,KCNMB2,CALM2,CALM3,PORCN,GRIA3,GRIK5,NLGN1,DLGAP3,KCNQ5,KCNQ4,SCN4B,KCNMB1,KCNQ2,CACNA1H,GABRA6
GO: Cellular Component	GO:1990351	transporter complex		9.277E-8	3.999E-5	1.999E-6	1.328E-5	16	365	SHANK1,KCNMB2,CALM2,CALM3,PORCN,GRIA3,GRIK5,NLGN1,DLGAP3,KCNQ5,KCNQ4,SCN4B,KCNMB1,KCNQ2,CACNA1H,GABRA6
GO: Cellular Component	GO:0014069	postsynaptic density		3.110E-7	1.340E-4	6.093E-6	4.048E-5	17	451	SHANK1,DLGAP2,DLGAP1,DRD2,AKAP5,ARFGEF2,GRIA3,LRRC4B,CNKSR2,GRIK5,NLGN1,LRRC4,ADD2,DLGAP3,CAMK2N1,GRIP2,PDZD2
GO: Cellular Component	GO:0032279	asymmetric synapse		3.110E-7	1.340E-4	6.093E-6	4.048E-5	17	451	SHANK1,DLGAP2,DLGAP1,DRD2,AKAP5,ARFGEF2,GRIA3,LRRC4B,CNKSR2,GRIK5,NLGN1,LRRC4,ADD2,DLGAP3,CAMK2N1,GRIP2,PDZD2
GO: Cellular Component	GO:0070382	exocytic vesicle		7.238E-7	3.120E-4	1.356E-5	9.013E-5	14	324	DPYSL3,DRD2,CALM2,CALM3,SYTL2,APBA1,SYT9,SYT2,SYT7,SYTL3,SYT4,SYT5,SYTL1,SYT13
GO: Cellular Component	GO:0099240	intrinsic component of synaptic membrane		2.247E-6	9.685E-4	4.036E-5	2.681E-4	12	259	DRD2,NTNG1,GRIA3,LRRC4B,GRIK5,NLGN1,LRRC4,SYT7,NTNG2,CACNA1H,ADGRL2,GABRA6
GO: Cellular Component	GO:0034705	potassium channel complex		2.709E-6	1.167E-3	4.669E-5	3.103E-4	8	103	KCNMB2,CALM2,CALM3,GRIK5,KCNQ5,KCNQ4,KCNMB1,KCNQ2
GO: Cellular Component	GO:0008328	ionotropic glutamate receptor complex		7.750E-6	3.340E-3	1.267E-4	8.422E-4	6	56	SHANK1,PORCN,GRIA3,GRIK5,NLGN1,DLGAP3
GO: Cellular Component	GO:0044306	neuron projection terminus		7.940E-6	3.422E-3	1.267E-4	8.422E-4	12	293	DRD2,SYT9,GRIA3,GRIK5,SYT2,SYT7,CCKAR,TULP1,UCN,SYT4,UCN3,GABRA6
GO: Cellular Component	GO:0098878	neurotransmitter receptor complex		9.527E-6	4.106E-3	1.466E-4	9.744E-4	6	58	SHANK1,PORCN,GRIA3,GRIK5,NLGN1,DLGAP3
GO: Cellular Component	GO:0030133	transport vesicle		1.044E-5	4.501E-3	1.552E-4	1.031E-3	16	524	DPYSL3,DRD2,CALM2,MAP6,CALM3,SYTL2,APBA1,SYT9,SYT2,CAV2,SYT7,SYTL3,SYT4,SYT5,SYTL1,SYT13
GO: Cellular Component	GO:0008076	voltage-gated potassium channel complex		1.235E-5	5.321E-3	1.745E-4	1.160E-3	7	91	KCNMB2,CALM2,CALM3,KCNQ5,KCNQ4,KCNMB1,KCNQ2
GO: Cellular Component	GO:0031045	dense core granule		1.255E-5	5.410E-3	1.745E-4	1.160E-3	5	36	SYT9,SYT2,SYT7,SYT4,SYT5
GO: Cellular Component	GO:0043679	axon terminus		2.007E-5	8.651E-3	2.674E-4	1.777E-3	11	270	DRD2,SYT9,GRIA3,GRIK5,SYT2,SYT7,CCKAR,TULP1,UCN,UCN3,GABRA6
GO: Cellular Component	GO:0042734	presynaptic membrane		2.048E-5	8.825E-3	2.674E-4	1.777E-3	10	222	DRD2,APBA1,NTNG1,GRIA3,LRRC4B,GRIK5,SYT7,NTNG2,CACNA1H,GABRA6
GO: Cellular Component	GO:0099055	integral component of postsynaptic membrane		2.259E-5	9.737E-3	2.864E-4	1.903E-3	9	179	DRD2,GRIA3,LRRC4B,GRIK5,NLGN1,LRRC4,CACNA1H,ADGRL2,GABRA6
GO: Cellular Component	GO:0099501	exocytic vesicle membrane		2.746E-5	1.183E-2	3.287E-4	2.184E-3	8	141	DRD2,CALM2,CALM3,SYT9,SYT2,SYT7,SYT4,SYT5
GO: Cellular Component	GO:0030672	synaptic vesicle membrane		2.746E-5	1.183E-2	3.287E-4	2.184E-3	8	141	DRD2,CALM2,CALM3,SYT9,SYT2,SYT7,SYT4,SYT5
GO: Cellular Component	GO:0044297	cell body		3.355E-5	1.446E-2	3.870E-4	2.571E-3	21	916	WHRN,DPYSL3,DRD2,AKAP5,DLGAP4,ACTG2,GRIA3,CNKSR2,GRIK5,SYT7,CRH,S100B,DLGAP3,EFHC1,CAMK2N1,UCN,SYT4,SYT5,CACNA1H,TRAK2,GABRA6
GO: Cellular Component	GO:0098936	intrinsic component of postsynaptic membrane		3.466E-5	1.494E-2	3.870E-4	2.571E-3	9	189	DRD2,GRIA3,LRRC4B,GRIK5,NLGN1,LRRC4,CACNA1H,ADGRL2,GABRA6
GO: Cellular Component	GO:0098797	plasma membrane protein complex		3.501E-5	1.509E-2	3.870E-4	2.571E-3	19	778	SHANK1,KCNMB2,CALM2,CALM3,PORCN,GRIA3,GRIK5,NLGN1,CAV2,FZD1,DLGAP3,KCNQ5,KCNQ4,WNT3A,SCN4B,KCNMB1,KCNQ2,CACNA1H,SNTA1
GO: Cellular Component	GO:0099699	integral component of synaptic membrane		3.842E-5	1.656E-2	4.140E-4	2.751E-3	10	239	DRD2,GRIA3,LRRC4B,GRIK5,NLGN1,LRRC4,SYT7,CACNA1H,ADGRL2,GABRA6
GO: Cellular Component	GO:0043025	neuronal cell body		6.846E-5	2.951E-2	7.196E-4	4.782E-3	19	818	WHRN,DRD2,AKAP5,DLGAP4,GRIA3,CNKSR2,GRIK5,SYT7,CRH,S100B,DLGAP3,EFHC1,CAMK2N1,UCN,SYT4,SYT5,CACNA1H,TRAK2,GABRA6
Pathway	1268763	Neuronal System	BioSystems: REACTOME	8.890E-13	7.903E-10	7.903E-10	5.823E-9	22	349	SHANK1,KCNMB2,DLGAP2,DLGAP1,AKAP5,CALM2,CALM3,DLGAP4,APBA1,SYT9,GRIA3,GRIK5,NLGN1,SYT2,SYT7,DLGAP3,KCNQ5,KCNQ4,KCNMB1,KCNQ2,GRIP2,GABRA6
Pathway	1427849	Protein-protein interactions at synapses	BioSystems: REACTOME	5.220E-11	4.641E-8	2.320E-8	1.710E-7	11	72	SHANK1,DLGAP2,DLGAP1,DLGAP4,APBA1,SYT9,GRIA3,NLGN1,SYT2,SYT7,DLGAP3
Pathway	1427850	Interactions of neurexins and neuroligins at synapses	BioSystems: REACTOME	1.172E-10	1.042E-7	3.472E-8	2.558E-7	10	58	SHANK1,DLGAP2,DLGAP1,DLGAP4,APBA1,SYT9,NLGN1,SYT2,SYT7,DLGAP3
Pathway	1269570	Class B/2 (Secretin family receptors)	BioSystems: REACTOME	2.457E-5	2.184E-2	5.460E-3	4.023E-2	7	93	WNT5A,CRH,FZD1,FZD7,UCN,WNT3A,UCN3
Pathway	M7761	Melanogenesis	MSigDB C2 BIOCARTA (v7.5.1)	4.196E-5	3.730E-2	6.217E-3	4.581E-2	7	101	CALM2,CALM3,WNT5A,CREB3L4,FZD1,FZD7,WNT3A
Pathway	83092	Melanogenesis	BioSystems: KEGG	4.196E-5	3.730E-2	6.217E-3	4.581E-2	7	101	CALM2,CALM3,WNT5A,CREB3L4,FZD1,FZD7,WNT3A
Disease	C3714756	Intellectual Disability	DisGeNET BeFree	4.339E-7	1.658E-3	1.658E-3	1.464E-2	29	1219	SHANK1,CHL1,SOX11,VLDLR,DRD2,ANK3,MAP6,KDM5A,NXPH1,TSPYL2,NTNG1,GRIA3,POU3F4,CNKSR2,NLGN1,NAA50,WDR45,NTNG2,KCNQ5,UCN,EIF2S2,KCNQ2,FGF13,ASXL2,TESC,PAX3,ELN,OLIG2,MYO16
Disease	C0038443	Stress, Psychological	DisGeNET BeFree	1.126E-6	4.305E-3	2.153E-3	1.900E-2	11	199	DRD2,ANK3,CALM2,CALM3,GRIA3,IRF6,SSR2,CRH,TFPI,UCN,GABRA6
Disease	C0036341	Schizophrenia	DisGeNET Curated	6.129E-6	2.343E-2	7.809E-3	6.892E-2	22	883	SHANK1,CHL1,DLGAP2,VLDLR,DLGAP1,DRD2,ANK3,MAP6,NTNG1,GRIA3,GRIK5,NLGN1,CRH,OPCML,CCKAR,S100B,NTNG2,KCNQ2,LSAMP,OLIG2,MYO16,GABRA6
Disease	C0339084	Floppy lid syndrome	DisGeNET BeFree	1.189E-5	4.546E-2	8.662E-3	7.645E-2	3	6	CALM2,CALM3,ELN

## Sheet: 147 ASD genes
Category	ID	Name	Source	p-value	q-value Bonferroni	q-value FDR B&H	q-value FDR B&Y	Hit Count in Query List	Hit Count in Genome	Hit in Query List
GO: Molecular Function	GO:0003712	transcription coregulator activity		2.233E-13	1.222E-10	1.222E-10	8.408E-10	25	545	MYT1L,TCF4,KDM5B,TCF20,HDAC4,PHF12,ZMYND8,DYRK1A,NSD1,SIN3A,BCL11A,MED13L,SKI,TBL1XR1,CREBBP,PHF2,KMT2C,ARID1B,LDB1,NCOA1,SMARCC2,IRF2BPL,CTNNB1,SLC30A9,DNMT3A
GO: Molecular Function	GO:0003682	chromatin binding		1.091E-10	5.967E-8	2.984E-8	2.053E-7	25	725	TCF4,TCF7L2,HDAC4,ASH1L,NSD1,CHD8,SIN3A,KDM6B,SKI,ADNP,CREBBP,PHF21A,WAC,ARID1B,LDB1,SATB1,KMT5B,ASXL3,NCOA1,SMARCC2,FOXP1,CTNNB1,SLC30A9,MBD5,DNMT3A
GO: Molecular Function	GO:0003714	transcription corepressor activity		5.864E-9	3.208E-6	1.069E-6	7.359E-6	13	212	TCF4,KDM5B,HDAC4,PHF12,ZMYND8,NSD1,SIN3A,BCL11A,SKI,TBL1XR1,CREBBP,IRF2BPL,DNMT3A
GO: Molecular Function	GO:1990837	sequence-specific double-stranded DNA binding		3.609E-8	1.974E-5	3.929E-6	2.704E-5	35	1756	MYT1L,TCF4,KDM5B,XRN2,TCF7L2,DEAF1,TCF20,HDAC4,FOXP2,VEZF1,NACC1,NSD1,POU3F2,CHD2,POGZ,BCL11A,KDM6B,SKI,ADNP,RFX3,TBL1XR1,CREBBP,SOX7,SATB1,NKX2-4,MKX,NCOA1,FOXP1,RORB,NR3C2,NKX2-2,PAX5,TBR1,MMP12,DNMT3A
GO: Molecular Function	GO:0003690	double-stranded DNA binding		4.310E-8	2.358E-5	3.929E-6	2.704E-5	36	1855	MYT1L,TCF4,KDM5B,XRN2,TCF7L2,DEAF1,TCF20,HDAC4,FOXP2,VEZF1,MAPT,NACC1,NSD1,POU3F2,CHD2,POGZ,BCL11A,KDM6B,SKI,ADNP,RFX3,TBL1XR1,CREBBP,SOX7,SATB1,NKX2-4,MKX,NCOA1,FOXP1,RORB,NR3C2,NKX2-2,PAX5,TBR1,MMP12,DNMT3A
GO: Molecular Function	GO:0043565	sequence-specific DNA binding		4.310E-8	2.358E-5	3.929E-6	2.704E-5	36	1855	MYT1L,TCF4,KDM5B,XRN2,TCF7L2,DEAF1,TCF20,HDAC4,FOXP2,VEZF1,MAPT,NACC1,NSD1,POU3F2,CHD2,POGZ,BCL11A,KDM6B,SKI,ADNP,RFX3,TBL1XR1,CREBBP,SOX7,SATB1,NKX2-4,MKX,NCOA1,FOXP1,RORB,NR3C2,NKX2-2,PAX5,TBR1,MMP12,DNMT3A
GO: Molecular Function	GO:0000976	transcription cis-regulatory region binding		6.233E-8	3.410E-5	4.574E-6	3.148E-5	34	1709	MYT1L,TCF4,XRN2,TCF7L2,DEAF1,TCF20,HDAC4,FOXP2,VEZF1,NACC1,NSD1,POU3F2,CHD2,POGZ,BCL11A,KDM6B,SKI,ADNP,RFX3,TBL1XR1,CREBBP,SOX7,SATB1,NKX2-4,MKX,NCOA1,FOXP1,RORB,NR3C2,NKX2-2,PAX5,TBR1,MMP12,DNMT3A
GO: Molecular Function	GO:0001067	transcription regulatory region nucleic acid binding		6.690E-8	3.659E-5	4.574E-6	3.148E-5	34	1714	MYT1L,TCF4,XRN2,TCF7L2,DEAF1,TCF20,HDAC4,FOXP2,VEZF1,NACC1,NSD1,POU3F2,CHD2,POGZ,BCL11A,KDM6B,SKI,ADNP,RFX3,TBL1XR1,CREBBP,SOX7,SATB1,NKX2-4,MKX,NCOA1,FOXP1,RORB,NR3C2,NKX2-2,PAX5,TBR1,MMP12,DNMT3A
GO: Molecular Function	GO:0140297	DNA-binding transcription factor binding		2.428E-7	1.328E-4	1.476E-5	1.016E-4	16	454	TCF4,TCF7L2,HDAC4,FOXP2,ZMYND8,NSD1,SIN3A,SKI,TRIP12,CREBBP,LDB1,MKX,NCOA1,FOXP1,CTNNB1,SLC30A9
GO: Molecular Function	GO:0035255	ionotropic glutamate receptor binding		3.793E-7	2.075E-4	2.075E-5	1.428E-4	6	39	MAP1A,GRIN2B,PTEN,SHANK3,SHANK2,CTNNB1
GO: Molecular Function	GO:0035254	glutamate receptor binding		8.152E-7	4.459E-4	4.054E-5	2.790E-4	7	70	MAP1A,GRIA2,GRIN2B,PTEN,SHANK3,SHANK2,CTNNB1
GO: Molecular Function	GO:0008134	transcription factor binding		9.007E-7	4.927E-4	4.106E-5	2.826E-4	20	768	TCF4,TCF7L2,HDAC4,FOXP2,PHF12,ZMYND8,NSD1,SIN3A,SKI,TRIP12,CREBBP,LDB1,MKX,NCOA1,FOXP1,RORB,NKX2-2,CTNNB1,SLC30A9,DNMT3A
GO: Molecular Function	GO:0018024	histone-lysine N-methyltransferase activity		1.044E-6	5.711E-4	4.393E-5	3.023E-4	6	46	ASH1L,NSD1,KMT2E,KMT2C,KMT5B,SETD5
GO: Molecular Function	GO:0000977	RNA polymerase II transcription regulatory region sequence-specific DNA binding		1.228E-6	6.717E-4	4.798E-5	3.302E-4	30	1583	MYT1L,TCF4,TCF7L2,DEAF1,HDAC4,FOXP2,VEZF1,NACC1,NSD1,POU3F2,CHD2,POGZ,BCL11A,KDM6B,SKI,ADNP,RFX3,CREBBP,SOX7,SATB1,NKX2-4,MKX,NCOA1,FOXP1,RORB,NR3C2,NKX2-2,PAX5,TBR1,DNMT3A
GO: Molecular Function	GO:0003713	transcription coactivator activity		1.793E-6	9.808E-4	6.539E-5	4.500E-4	12	293	MYT1L,TCF20,DYRK1A,SIN3A,CREBBP,PHF2,KMT2C,ARID1B,NCOA1,SMARCC2,CTNNB1,SLC30A9
GO: Molecular Function	GO:0000978	RNA polymerase II cis-regulatory region sequence-specific DNA binding		2.423E-6	1.325E-3	8.284E-5	5.702E-4	26	1292	MYT1L,TCF4,TCF7L2,HDAC4,FOXP2,VEZF1,NACC1,NSD1,POU3F2,CHD2,POGZ,BCL11A,KDM6B,SKI,RFX3,SOX7,SATB1,NKX2-4,MKX,FOXP1,RORB,NR3C2,NKX2-2,PAX5,TBR1,DNMT3A
GO: Molecular Function	GO:0000987	cis-regulatory region sequence-specific DNA binding		3.253E-6	1.779E-3	1.047E-4	7.204E-4	26	1313	MYT1L,TCF4,TCF7L2,HDAC4,FOXP2,VEZF1,NACC1,NSD1,POU3F2,CHD2,POGZ,BCL11A,KDM6B,SKI,RFX3,SOX7,SATB1,NKX2-4,MKX,FOXP1,RORB,NR3C2,NKX2-2,PAX5,TBR1,DNMT3A
GO: Molecular Function	GO:0042054	histone methyltransferase activity		3.785E-6	2.070E-3	1.150E-4	7.916E-4	6	57	ASH1L,NSD1,KMT2E,KMT2C,KMT5B,SETD5
GO: Molecular Function	GO:0016279	protein-lysine N-methyltransferase activity		9.799E-6	5.360E-3	2.821E-4	1.942E-3	6	67	ASH1L,NSD1,KMT2E,KMT2C,KMT5B,SETD5
GO: Molecular Function	GO:0016278	lysine N-methyltransferase activity		1.068E-5	5.844E-3	2.922E-4	2.011E-3	6	68	ASH1L,NSD1,KMT2E,KMT2C,KMT5B,SETD5
GO: Molecular Function	GO:0008013	beta-catenin binding		1.250E-5	6.835E-3	3.255E-4	2.240E-3	7	105	TCF4,TCF7L2,CHD8,GRIN2B,KDM6B,TBL1XR1,CTNNB1
GO: Molecular Function	GO:0019900	kinase binding		2.018E-5	1.104E-2	4.799E-4	3.303E-3	21	1027	DPYSL2,TCF7L2,ANK2,HDAC4,DSCAM,MAPT,KIZ,BAG5,GRIA2,BCL11A,PTEN,SKI,GFAP,SYNGAP1,STXBP1,CADPS,KCNQ3,PPP1R9B,TAOK1,CTNNB1,TBR1
GO: Molecular Function	GO:0042393	histone binding		2.018E-5	1.104E-2	4.799E-4	3.303E-3	10	256	KDM5B,ZMYND8,CHD8,CHD2,KDM6B,KMT2E,TBL1XR1,PHF2,KMT2C,SMARCC2
GO: Molecular Function	GO:0048156	tau protein binding		2.151E-5	1.177E-2	4.903E-4	3.374E-3	5	46	MAP1A,MARK3,DYRK1A,PPP5C,TAOK1
GO: Molecular Function	GO:0061629	RNA polymerase II-specific DNA-binding transcription factor binding		3.083E-5	1.686E-2	6.745E-4	4.642E-3	11	327	TCF7L2,FOXP2,NSD1,SIN3A,TRIP12,CREBBP,LDB1,NCOA1,FOXP1,CTNNB1,SLC30A9
GO: Molecular Function	GO:0008757	S-adenosylmethionine-dependent methyltransferase activity		3.319E-5	1.816E-2	6.983E-4	4.806E-3	8	167	ASH1L,NSD1,KMT2E,KMT2C,KMT5B,SETD5,DNMT3A,TRMT61A
GO: Molecular Function	GO:0019901	protein kinase binding		4.751E-5	2.599E-2	9.624E-4	6.624E-3	19	923	DPYSL2,TCF7L2,ANK2,HDAC4,DSCAM,MAPT,KIZ,BAG5,GRIA2,BCL11A,PTEN,SKI,SYNGAP1,STXBP1,CADPS,KCNQ3,TAOK1,CTNNB1,TBR1
GO: Molecular Function	GO:0046975	histone methyltransferase activity (H3-K36 specific)		6.142E-5	3.360E-2	1.200E-3	8.258E-3	3	11	ASH1L,NSD1,SETD5
GO: Molecular Function	GO:0008276	protein methyltransferase activity		7.210E-5	3.944E-2	1.338E-3	9.210E-3	6	95	ASH1L,NSD1,KMT2E,KMT2C,KMT5B,SETD5
GO: Molecular Function	GO:0022836	gated channel activity		7.339E-5	4.014E-2	1.338E-3	9.210E-3	11	360	GABRB2,GABRB3,CACNA1E,GRIA2,GRIN2B,SCN1A,SCN2A,KCNMA1,KCNN2,KCNQ3,CACNA2D3
GO: Biological Process	GO:0060322	head development		1.236E-16	4.909E-13	4.909E-13	4.351E-12	42	1359	GABRB3,TCF4,DPYSL2,XRN2,TCF7L2,FOXP2,MAPT,PTBP2,WNT3,DYRK1A,POU3F2,CHD8,SIN3A,BCL11A,GRIN2B,KDM6B,PTEN,SKI,CREBBP,SHANK3,CRHR1,PHF21A,SYNGAP1,CKB,WNT5B,CORO1A,LDB1,SHANK2,NRXN1,NKX2-4,NEGR1,NTM,MACROD2,ANKRD11,NCOA1,FOXP1,PPP1R9B,RORB,NKX2-2,PAX5,CTNNB1,TBR1
GO: Biological Process	GO:0007420	brain development		4.049E-15	1.608E-11	8.042E-12	7.129E-11	39	1289	GABRB3,TCF4,DPYSL2,XRN2,TCF7L2,FOXP2,MAPT,PTBP2,WNT3,DYRK1A,POU3F2,CHD8,SIN3A,BCL11A,GRIN2B,KDM6B,PTEN,SKI,SHANK3,CRHR1,SYNGAP1,CKB,WNT5B,CORO1A,LDB1,SHANK2,NRXN1,NKX2-4,NEGR1,NTM,MACROD2,NCOA1,FOXP1,PPP1R9B,RORB,NKX2-2,PAX5,CTNNB1,TBR1
GO: Biological Process	GO:0007417	central nervous system development		1.066E-14	4.235E-11	1.412E-11	1.251E-10	44	1694	GABRB3,TCF4,DPYSL2,XRN2,TCF7L2,SPAST,FOXP2,MAPT,PTBP2,WNT3,DYRK1A,POU3F2,CHD8,POGZ,SIN3A,BCL11A,GRIN2B,KDM6B,PTEN,SKI,GFAP,SHANK3,CRHR1,SYNGAP1,CKB,WNT5B,CORO1A,LDB1,SHANK2,NRXN1,NKX2-4,NEGR1,NTM,MACROD2,NCOA1,KCNQ3,FOXP1,PPP1R9B,RORB,NKX2-2,PAX5,CTNNB1,TBR1,DYNC1H1
GO: Biological Process	GO:0007610	behavior		8.204E-14	3.259E-10	8.147E-11	7.222E-10	32	940	GABRB3,CACNA1E,DEAF1,HDAC4,DSCAM,MAP1A,FOXP2,MAPT,CHD8,POGZ,GRIN2B,PTEN,ADNP,SHANK3,CRHR1,PHF21A,SYNGAP1,SLC6A1,AP2S1,SHANK2,NRXN1,SETD5,NEGR1,SCN1A,SCN2A,KCNMA1,NCOA1,FOXP1,PPP1R9B,PAX5,TBR1,MBD5
GO: Biological Process	GO:0007611	learning or memory		1.197E-12	4.753E-9	8.451E-10	7.492E-9	20	362	GABRB3,CACNA1E,DEAF1,MAP1A,FOXP2,MAPT,CHD8,GRIN2B,PTEN,ADNP,SHANK3,CRHR1,SYNGAP1,SLC6A1,AP2S1,SHANK2,NRXN1,SCN2A,PPP1R9B,TBR1
GO: Biological Process	GO:0050890	cognition		1.277E-12	5.071E-9	8.451E-10	7.492E-9	21	409	GABRB3,CACNA1E,DEAF1,MAP1A,FOXP2,MAPT,CHD8,GRIN2B,PTEN,ADNP,SHANK3,CRHR1,SYNGAP1,SLC6A1,AP2S1,SHANK2,NRXN1,SETD5,SCN2A,PPP1R9B,TBR1
GO: Biological Process	GO:0006325	chromatin organization		1.502E-12	5.964E-9	8.520E-10	7.553E-9	30	916	TLK2,KDM5B,HDAC4,ASH1L,NSD1,CHD8,CHD2,SIN3A,KDM6B,KMT2E,SKI,TBL1XR1,TRIP12,CREBBP,PHF21A,WAC,PHF2,KMT2C,ARID1B,LDB1,KANSL1,PPP5C,SATB1,KMT5B,SETD5,NCOA1,SMARCC2,PAX5,CTNNB1,DNMT3A
GO: Biological Process	GO:0016570	histone modification		4.647E-12	1.846E-8	2.307E-9	2.045E-8	23	540	KDM5B,HDAC4,ASH1L,NSD1,SIN3A,KDM6B,KMT2E,SKI,TBL1XR1,TRIP12,CREBBP,WAC,PHF2,KMT2C,LDB1,KANSL1,PPP5C,SATB1,KMT5B,SETD5,NCOA1,PAX5,CTNNB1
GO: Biological Process	GO:0051276	chromosome organization		5.639E-12	2.240E-8	2.488E-9	2.206E-8	36	1389	TLK2,KDM5B,TCF7L2,HDAC4,MAPT,ASH1L,NSD1,CHD8,CHD2,POGZ,SIN3A,XRCC3,KDM6B,KMT2E,SKI,TBL1XR1,TRIP12,CREBBP,PHF21A,WAC,PHF2,KMT2C,ARID1B,LDB1,KANSL1,NUP155,PPP5C,SATB1,KMT5B,SETD5,NCOA1,PINX1,SMARCC2,PAX5,CTNNB1,DNMT3A
GO: Biological Process	GO:0048666	neuron development		1.515E-11	6.019E-8	4.157E-9	3.685E-8	39	1673	MYT1L,GABRB2,GABRB3,DPYSL2,SPAST,DSCAM,MAP1A,MAPT,WNT3,BAG5,ZMYND8,POU3F2,SIN3A,BCL11A,LRRC4C,PTEN,ADNP,GFAP,SHANK3,PTK7,SYNGAP1,BLK,DIP2A,CORO1A,ARID1B,PPP2R5D,STXBP1,SHANK2,NRXN1,NEGR1,NTM,FOXP1,PPP1R9B,TAOK1,RORB,NKX2-2,PAX5,CTNNB1,TBR1
GO: Biological Process	GO:0098916	anterograde trans-synaptic signaling		1.622E-11	6.441E-8	4.157E-9	3.685E-8	31	1076	GABRB2,GABRB3,CACNA1E,CELF4,MAP1A,MAPT,ZMYND8,GRIA2,GRIN2B,LRRC4C,PTEN,ADNP,GFAP,SHANK3,CRHR1,SYNGAP1,SLC6A1,ARID1B,STXBP1,SHANK2,NRXN1,CADPS,SCN1A,SCN2A,KCNMA1,KCNN2,KCNQ3,PPP1R9B,GNAI1,NR3C2,CTNNB1
GO: Biological Process	GO:0007268	chemical synaptic transmission		1.622E-11	6.441E-8	4.157E-9	3.685E-8	31	1076	GABRB2,GABRB3,CACNA1E,CELF4,MAP1A,MAPT,ZMYND8,GRIA2,GRIN2B,LRRC4C,PTEN,ADNP,GFAP,SHANK3,CRHR1,SYNGAP1,SLC6A1,ARID1B,STXBP1,SHANK2,NRXN1,CADPS,SCN1A,SCN2A,KCNMA1,KCNN2,KCNQ3,PPP1R9B,GNAI1,NR3C2,CTNNB1
GO: Biological Process	GO:1903508	positive regulation of nucleic acid-templated transcription		1.646E-11	6.539E-8	4.157E-9	3.685E-8	41	1841	MYT1L,TCF4,TCF7L2,DEAF1,TCF20,HDAC4,VEZF1,ASH1L,DYRK1A,NSD1,POU3F2,CHD8,POGZ,SIN3A,KDM6B,KMT2E,SKI,RFX3,TBL1XR1,CREBBP,WAC,PHF2,SOX7,KMT2C,ARID1B,PPP2R5D,LDB1,ASXL3,MKX,NCOA1,SMARCC2,FOXP1,IRF2BPL,RORB,NKX2-2,PAX5,CTNNB1,TBR1,SLC30A9,MMP12,RAI1
GO: Biological Process	GO:0045893	positive regulation of transcription, DNA-templated		1.646E-11	6.539E-8	4.157E-9	3.685E-8	41	1841	MYT1L,TCF4,TCF7L2,DEAF1,TCF20,HDAC4,VEZF1,ASH1L,DYRK1A,NSD1,POU3F2,CHD8,POGZ,SIN3A,KDM6B,KMT2E,SKI,RFX3,TBL1XR1,CREBBP,WAC,PHF2,SOX7,KMT2C,ARID1B,PPP2R5D,LDB1,ASXL3,MKX,NCOA1,SMARCC2,FOXP1,IRF2BPL,RORB,NKX2-2,PAX5,CTNNB1,TBR1,SLC30A9,MMP12,RAI1
GO: Biological Process	GO:0007612	learning		1.671E-11	6.636E-8	4.157E-9	3.685E-8	15	204	GABRB3,CACNA1E,DEAF1,MAP1A,FOXP2,GRIN2B,SHANK3,CRHR1,SYNGAP1,SLC6A1,AP2S1,SHANK2,NRXN1,PPP1R9B,TBR1
GO: Biological Process	GO:1902680	positive regulation of RNA biosynthetic process		1.675E-11	6.652E-8	4.157E-9	3.685E-8	41	1842	MYT1L,TCF4,TCF7L2,DEAF1,TCF20,HDAC4,VEZF1,ASH1L,DYRK1A,NSD1,POU3F2,CHD8,POGZ,SIN3A,KDM6B,KMT2E,SKI,RFX3,TBL1XR1,CREBBP,WAC,PHF2,SOX7,KMT2C,ARID1B,PPP2R5D,LDB1,ASXL3,MKX,NCOA1,SMARCC2,FOXP1,IRF2BPL,RORB,NKX2-2,PAX5,CTNNB1,TBR1,SLC30A9,MMP12,RAI1
GO: Biological Process	GO:0099537	trans-synaptic signaling		2.003E-11	7.954E-8	4.679E-9	4.148E-8	31	1085	GABRB2,GABRB3,CACNA1E,CELF4,MAP1A,MAPT,ZMYND8,GRIA2,GRIN2B,LRRC4C,PTEN,ADNP,GFAP,SHANK3,CRHR1,SYNGAP1,SLC6A1,ARID1B,STXBP1,SHANK2,NRXN1,CADPS,SCN1A,SCN2A,KCNMA1,KCNN2,KCNQ3,PPP1R9B,GNAI1,NR3C2,CTNNB1
GO: Biological Process	GO:0051254	positive regulation of RNA metabolic process		2.199E-11	8.735E-8	4.853E-9	4.302E-8	42	1942	MYT1L,TCF4,CELF4,TCF7L2,DEAF1,TCF20,HDAC4,VEZF1,ASH1L,DYRK1A,NSD1,POU3F2,CHD8,POGZ,SIN3A,KDM6B,KMT2E,SKI,RFX3,TBL1XR1,CREBBP,WAC,PHF2,SOX7,KMT2C,ARID1B,PPP2R5D,LDB1,ASXL3,MKX,NCOA1,SMARCC2,FOXP1,IRF2BPL,RORB,NKX2-2,PAX5,CTNNB1,TBR1,SLC30A9,MMP12,RAI1
GO: Biological Process	GO:0099536	synaptic signaling		3.323E-11	1.320E-7	6.948E-9	6.159E-8	31	1107	GABRB2,GABRB3,CACNA1E,CELF4,MAP1A,MAPT,ZMYND8,GRIA2,GRIN2B,LRRC4C,PTEN,ADNP,GFAP,SHANK3,CRHR1,SYNGAP1,SLC6A1,ARID1B,STXBP1,SHANK2,NRXN1,CADPS,SCN1A,SCN2A,KCNMA1,KCNN2,KCNQ3,PPP1R9B,GNAI1,NR3C2,CTNNB1
GO: Biological Process	GO:0045934	negative regulation of nucleobase-containing compound metabolic process		1.058E-10	4.202E-7	2.101E-8	1.862E-7	39	1785	MYT1L,TRAF7,TCF4,KDM5B,CELF4,TCF7L2,DEAF1,HDAC4,FOXP2,NACC1,PTBP2,PHF12,ZMYND8,DYRK1A,NSD1,CHD8,SIN3A,BCL11A,SKI,RFX3,TBL1XR1,TRIP12,CREBBP,PHF21A,PHF2,SOX7,LDB1,SATB1,MKX,PINX1,SMARCC2,FOXP1,IRF2BPL,RORB,PAX5,CTNNB1,TBR1,MMP12,DNMT3A
GO: Biological Process	GO:0031175	neuron projection development		2.260E-10	8.977E-7	4.275E-8	3.789E-7	34	1424	DPYSL2,SPAST,DSCAM,MAP1A,MAPT,WNT3,BAG5,ZMYND8,POU3F2,SIN3A,BCL11A,LRRC4C,PTEN,ADNP,GFAP,SHANK3,PTK7,SYNGAP1,BLK,DIP2A,CORO1A,ARID1B,PPP2R5D,STXBP1,SHANK2,NRXN1,NEGR1,NTM,FOXP1,PPP1R9B,TAOK1,NKX2-2,CTNNB1,TBR1
GO: Biological Process	GO:0051253	negative regulation of RNA metabolic process		2.472E-10	9.820E-7	4.464E-8	3.957E-7	37	1670	MYT1L,TRAF7,TCF4,KDM5B,CELF4,TCF7L2,DEAF1,HDAC4,FOXP2,NACC1,PTBP2,PHF12,ZMYND8,DYRK1A,NSD1,CHD8,SIN3A,BCL11A,SKI,RFX3,TBL1XR1,CREBBP,PHF21A,PHF2,SOX7,LDB1,SATB1,MKX,SMARCC2,FOXP1,IRF2BPL,RORB,PAX5,CTNNB1,TBR1,MMP12,DNMT3A
GO: Biological Process	GO:0042391	regulation of membrane potential		3.658E-10	1.453E-6	6.316E-8	5.599E-7	21	554	GABRB2,GABRB3,CACNA1E,CELF4,ANK2,MAPT,ZMYND8,GRIA2,GRIN2B,PTEN,SHANK3,SHANK2,NUP155,NRXN1,SCN1A,SCN2A,KCNMA1,KCNN2,KCNQ3,FOXP1,NR3C2
GO: Biological Process	GO:0030900	forebrain development		1.580E-9	6.275E-6	2.614E-7	2.318E-6	21	601	DPYSL2,XRN2,TCF7L2,FOXP2,WNT3,POU3F2,CHD8,SIN3A,GRIN2B,KDM6B,PTEN,SKI,SHANK3,CRHR1,NKX2-4,NCOA1,FOXP1,PPP1R9B,PAX5,CTNNB1,TBR1
GO: Biological Process	GO:0045892	negative regulation of transcription, DNA-templated		1.682E-9	6.681E-6	2.657E-7	2.355E-6	34	1538	MYT1L,TRAF7,TCF4,KDM5B,TCF7L2,DEAF1,HDAC4,FOXP2,NACC1,PHF12,ZMYND8,NSD1,CHD8,SIN3A,BCL11A,SKI,RFX3,TBL1XR1,CREBBP,PHF21A,PHF2,SOX7,LDB1,SATB1,MKX,SMARCC2,FOXP1,IRF2BPL,RORB,PAX5,CTNNB1,TBR1,MMP12,DNMT3A
GO: Biological Process	GO:1903507	negative regulation of nucleic acid-templated transcription		1.739E-9	6.908E-6	2.657E-7	2.355E-6	34	1540	MYT1L,TRAF7,TCF4,KDM5B,TCF7L2,DEAF1,HDAC4,FOXP2,NACC1,PHF12,ZMYND8,NSD1,CHD8,SIN3A,BCL11A,SKI,RFX3,TBL1XR1,CREBBP,PHF21A,PHF2,SOX7,LDB1,SATB1,MKX,SMARCC2,FOXP1,IRF2BPL,RORB,PAX5,CTNNB1,TBR1,MMP12,DNMT3A
GO: Biological Process	GO:1902679	negative regulation of RNA biosynthetic process		1.859E-9	7.383E-6	2.735E-7	2.424E-6	34	1544	MYT1L,TRAF7,TCF4,KDM5B,TCF7L2,DEAF1,HDAC4,FOXP2,NACC1,PHF12,ZMYND8,NSD1,CHD8,SIN3A,BCL11A,SKI,RFX3,TBL1XR1,CREBBP,PHF21A,PHF2,SOX7,LDB1,SATB1,MKX,SMARCC2,FOXP1,IRF2BPL,RORB,PAX5,CTNNB1,TBR1,MMP12,DNMT3A
GO: Biological Process	GO:0045944	positive regulation of transcription by RNA polymerase II		2.847E-9	1.131E-5	4.039E-7	3.580E-6	32	1407	MYT1L,TCF4,TCF7L2,DEAF1,TCF20,HDAC4,VEZF1,ASH1L,POU3F2,CHD8,POGZ,SIN3A,KDM6B,SKI,RFX3,TBL1XR1,CREBBP,KMT2C,PPP2R5D,LDB1,ASXL3,MKX,NCOA1,FOXP1,IRF2BPL,RORB,NKX2-2,PAX5,CTNNB1,TBR1,SLC30A9,MMP12
GO: Biological Process	GO:0018205	peptidyl-lysine modification		4.326E-9	1.718E-5	5.925E-7	5.252E-6	18	459	TRAF7,HDAC4,ASH1L,NSD1,SIN3A,BCL11A,KMT2E,CREBBP,KMT2C,DIP2A,LDB1,KANSL1,NUP155,KMT5B,SETD5,NCOA1,PAX5,CTNNB1
GO: Biological Process	GO:0007613	memory		4.564E-9	1.813E-5	6.043E-7	5.357E-6	12	176	GABRB3,MAP1A,MAPT,CHD8,GRIN2B,PTEN,ADNP,SHANK3,CRHR1,SLC6A1,SHANK2,SCN2A
GO: Biological Process	GO:0000122	negative regulation of transcription by RNA polymerase II		6.462E-9	2.567E-5	8.279E-7	7.339E-6	27	1065	MYT1L,TRAF7,TCF4,TCF7L2,DEAF1,HDAC4,FOXP2,NACC1,PHF12,NSD1,CHD8,SIN3A,BCL11A,SKI,TBL1XR1,CREBBP,PHF21A,LDB1,SATB1,MKX,SMARCC2,FOXP1,IRF2BPL,PAX5,CTNNB1,MMP12,DNMT3A
GO: Biological Process	GO:2000113	negative regulation of cellular macromolecule biosynthetic process		1.349E-8	5.356E-5	1.674E-6	1.484E-5	36	1844	MYT1L,TRAF7,TCF4,KDM5B,CELF4,TCF7L2,DEAF1,HDAC4,FOXP2,NACC1,PHF12,ZMYND8,NSD1,CHD8,SIN3A,BCL11A,SKI,RFX3,TBL1XR1,CREBBP,PHF21A,PHF2,SOX7,LDB1,SATB1,MKX,PINX1,SMARCC2,FOXP1,IRF2BPL,RORB,PAX5,CTNNB1,TBR1,MMP12,DNMT3A
GO: Biological Process	GO:0120035	regulation of plasma membrane bounded cell projection organization		1.607E-8	6.384E-5	1.934E-6	1.715E-5	24	891	DPYSL2,SPAST,HDAC4,DSCAM,MAPT,WNT3,BAG5,ZMYND8,POU3F2,BCL11A,GRIN2B,LRRC4C,PTEN,ADNP,GFAP,SHANK3,PLEKHM1,PTK7,SYNGAP1,PPP2R5D,NRXN1,NEGR1,NTM,TBR1
GO: Biological Process	GO:0010558	negative regulation of macromolecule biosynthetic process		1.711E-8	6.795E-5	1.998E-6	1.772E-5	36	1861	MYT1L,TRAF7,TCF4,KDM5B,CELF4,TCF7L2,DEAF1,HDAC4,FOXP2,NACC1,PHF12,ZMYND8,NSD1,CHD8,SIN3A,BCL11A,SKI,RFX3,TBL1XR1,CREBBP,PHF21A,PHF2,SOX7,LDB1,SATB1,MKX,PINX1,SMARCC2,FOXP1,IRF2BPL,RORB,PAX5,CTNNB1,TBR1,MMP12,DNMT3A
GO: Biological Process	GO:0050804	modulation of chemical synaptic transmission		1.821E-8	7.233E-5	2.060E-6	1.826E-5	21	691	CELF4,MAP1A,MAPT,ZMYND8,GRIA2,GRIN2B,LRRC4C,PTEN,ADNP,GFAP,SHANK3,CRHR1,SYNGAP1,SLC6A1,STXBP1,SHANK2,NRXN1,KCNN2,PPP1R9B,GNAI1,NR3C2
GO: Biological Process	GO:0099177	regulation of trans-synaptic signaling		1.867E-8	7.416E-5	2.060E-6	1.826E-5	21	692	CELF4,MAP1A,MAPT,ZMYND8,GRIA2,GRIN2B,LRRC4C,PTEN,ADNP,GFAP,SHANK3,CRHR1,SYNGAP1,SLC6A1,STXBP1,SHANK2,NRXN1,KCNN2,PPP1R9B,GNAI1,NR3C2
GO: Biological Process	GO:0031344	regulation of cell projection organization		2.452E-8	9.738E-5	2.632E-6	2.333E-5	24	911	DPYSL2,SPAST,HDAC4,DSCAM,MAPT,WNT3,BAG5,ZMYND8,POU3F2,BCL11A,GRIN2B,LRRC4C,PTEN,ADNP,GFAP,SHANK3,PLEKHM1,PTK7,SYNGAP1,PPP2R5D,NRXN1,NEGR1,NTM,TBR1
GO: Biological Process	GO:0050808	synapse organization		2.552E-8	1.014E-4	2.668E-6	2.365E-5	19	576	GABRB2,GABRB3,SPAST,DSCAM,MAPT,ZMYND8,GRIN2B,LRRC4C,PTEN,ADNP,SHANK3,SYNGAP1,SLC6A1,DIP2A,SHANK2,NRXN1,SETD5,NEGR1,CTNNB1
GO: Biological Process	GO:0050805	negative regulation of synaptic transmission		2.628E-8	1.044E-4	2.677E-6	2.373E-5	9	96	CELF4,MAPT,PTEN,ADNP,SHANK3,SLC6A1,STXBP1,SHANK2,GNAI1
GO: Biological Process	GO:0051129	negative regulation of cellular component organization		2.776E-8	1.103E-4	2.757E-6	2.444E-5	24	917	MAP1A,MAPT,WNT3,BAG5,DYRK1A,SIN3A,BCL11A,GRIN2B,XRCC3,ADTRP,PTEN,SKI,TRIP12,GFAP,SHANK3,SYNGAP1,PHF2,CORO1A,STXBP1,NRXN1,NTM,PINX1,TAOK1,PAX5
GO: Biological Process	GO:0060078	regulation of postsynaptic membrane potential		3.986E-8	1.583E-4	3.862E-6	3.423E-5	11	172	GABRB2,GABRB3,CELF4,ZMYND8,GRIA2,GRIN2B,PTEN,SHANK3,SHANK2,NRXN1,NR3C2
GO: Biological Process	GO:0021537	telencephalon development		4.967E-8	1.973E-4	4.697E-6	4.164E-5	15	365	DPYSL2,XRN2,FOXP2,POU3F2,GRIN2B,KDM6B,PTEN,SKI,SHANK3,NCOA1,FOXP1,PPP1R9B,PAX5,CTNNB1,TBR1
GO: Biological Process	GO:0031327	negative regulation of cellular biosynthetic process		5.728E-8	2.275E-4	5.291E-6	4.690E-5	36	1951	MYT1L,TRAF7,TCF4,KDM5B,CELF4,TCF7L2,DEAF1,HDAC4,FOXP2,NACC1,PHF12,ZMYND8,NSD1,CHD8,SIN3A,BCL11A,SKI,RFX3,TBL1XR1,CREBBP,PHF21A,PHF2,SOX7,LDB1,SATB1,MKX,PINX1,SMARCC2,FOXP1,IRF2BPL,RORB,PAX5,CTNNB1,TBR1,MMP12,DNMT3A
GO: Biological Process	GO:0048812	neuron projection morphogenesis		6.695E-8	2.659E-4	6.044E-6	5.357E-5	24	961	DPYSL2,SPAST,DSCAM,MAP1A,MAPT,WNT3,POU3F2,SIN3A,BCL11A,LRRC4C,PTEN,ADNP,SHANK3,SYNGAP1,DIP2A,CORO1A,STXBP1,SHANK2,NRXN1,FOXP1,TAOK1,NKX2-2,CTNNB1,TBR1
GO: Biological Process	GO:0120039	plasma membrane bounded cell projection morphogenesis		9.100E-8	3.615E-4	8.033E-6	7.120E-5	24	977	DPYSL2,SPAST,DSCAM,MAP1A,MAPT,WNT3,POU3F2,SIN3A,BCL11A,LRRC4C,PTEN,ADNP,SHANK3,SYNGAP1,DIP2A,CORO1A,STXBP1,SHANK2,NRXN1,FOXP1,TAOK1,NKX2-2,CTNNB1,TBR1
GO: Biological Process	GO:0010975	regulation of neuron projection development		9.677E-8	3.844E-4	8.356E-6	7.407E-5	19	627	DPYSL2,SPAST,DSCAM,MAPT,WNT3,BAG5,POU3F2,BCL11A,LRRC4C,PTEN,ADNP,GFAP,SHANK3,PTK7,SYNGAP1,PPP2R5D,NEGR1,NTM,TBR1
GO: Biological Process	GO:0048858	cell projection morphogenesis		1.039E-7	4.126E-4	8.778E-6	7.781E-5	24	984	DPYSL2,SPAST,DSCAM,MAP1A,MAPT,WNT3,POU3F2,SIN3A,BCL11A,LRRC4C,PTEN,ADNP,SHANK3,SYNGAP1,DIP2A,CORO1A,STXBP1,SHANK2,NRXN1,FOXP1,TAOK1,NKX2-2,CTNNB1,TBR1
GO: Biological Process	GO:0007416	synapse assembly		1.187E-7	4.716E-4	9.824E-6	8.709E-5	12	236	GABRB2,GABRB3,SPAST,DSCAM,MAPT,PTEN,ADNP,SHANK3,SHANK2,NRXN1,SETD5,NEGR1
GO: Biological Process	GO:0032990	cell part morphogenesis		1.619E-7	6.430E-4	1.312E-5	1.163E-4	24	1008	DPYSL2,SPAST,DSCAM,MAP1A,MAPT,WNT3,POU3F2,SIN3A,BCL11A,LRRC4C,PTEN,ADNP,SHANK3,SYNGAP1,DIP2A,CORO1A,STXBP1,SHANK2,NRXN1,FOXP1,TAOK1,NKX2-2,CTNNB1,TBR1
GO: Biological Process	GO:0007409	axonogenesis		2.294E-7	9.111E-4	1.822E-5	1.615E-4	20	732	DPYSL2,SPAST,DSCAM,MAP1A,MAPT,WNT3,POU3F2,SIN3A,BCL11A,LRRC4C,PTEN,ADNP,SHANK3,SYNGAP1,CORO1A,STXBP1,NRXN1,FOXP1,NKX2-2,TBR1
GO: Biological Process	GO:0016571	histone methylation		2.786E-7	1.106E-3	2.169E-5	1.923E-4	10	165	ASH1L,NSD1,KMT2E,CREBBP,KMT2C,SATB1,KMT5B,SETD5,PAX5,CTNNB1
GO: Biological Process	GO:0048589	developmental growth		3.332E-7	1.323E-3	2.545E-5	2.256E-4	25	1128	KDM5B,DPYSL2,TCF7L2,SPAST,DSCAM,MAPT,WNT3,POU3F2,SIN3A,BCL11A,KDM6B,PTEN,ADNP,TBL1XR1,SHANK3,PTK7,WNT5B,KMT2C,SHANK2,KMT5B,ANKRD11,FOXP1,CTNNB1,MBD5,RAI1
GO: Biological Process	GO:0034330	cell junction organization		3.568E-7	1.417E-3	2.674E-5	2.370E-4	22	899	GABRB2,GABRB3,SPAST,DSCAM,MAPT,PKP4,ZMYND8,GRIN2B,LRRC4C,PTEN,TEK,ADNP,SHANK3,SYNGAP1,SLC6A1,DIP2A,LDB1,SHANK2,NRXN1,SETD5,NEGR1,CTNNB1
GO: Biological Process	GO:0048667	cell morphogenesis involved in neuron differentiation		4.301E-7	1.708E-3	3.164E-5	2.804E-4	22	909	DPYSL2,SPAST,DSCAM,MAP1A,MAPT,WNT3,POU3F2,SIN3A,BCL11A,LRRC4C,PTEN,ADNP,SHANK3,SYNGAP1,DIP2A,CORO1A,STXBP1,SHANK2,NRXN1,FOXP1,NKX2-2,TBR1
GO: Biological Process	GO:1905114	cell surface receptor signaling pathway involved in cell-cell signaling		4.797E-7	1.905E-3	3.464E-5	3.071E-4	20	767	GABRB3,CELF4,TCF7L2,WNT3,ZMYND8,GRIA2,CHD8,GRIN2B,PTEN,SKI,TBL1XR1,SHANK3,PTK7,WNT5B,SOX7,AP2S1,LDB1,SHANK2,NRXN1,CTNNB1
GO: Biological Process	GO:0071625	vocalization behavior		4.986E-7	1.980E-3	3.537E-5	3.135E-4	5	23	FOXP2,SHANK3,SHANK2,NRXN1,FOXP1
GO: Biological Process	GO:0099565	chemical synaptic transmission, postsynaptic		5.684E-7	2.258E-3	3.961E-5	3.511E-4	9	137	GABRB3,CELF4,ZMYND8,GRIA2,GRIN2B,PTEN,SHANK3,SHANK2,NRXN1
GO: Biological Process	GO:0021761	limbic system development		5.913E-7	2.349E-3	4.049E-5	3.589E-4	10	179	XRN2,POU3F2,GRIN2B,KDM6B,PTEN,CRHR1,NKX2-4,NCOA1,PPP1R9B,TBR1
GO: Biological Process	GO:0097106	postsynaptic density organization		7.273E-7	2.889E-3	4.896E-5	4.340E-4	6	45	ZMYND8,PTEN,SHANK3,SYNGAP1,SHANK2,NRXN1
GO: Biological Process	GO:0018193	peptidyl-amino acid modification		7.510E-7	2.983E-3	4.972E-5	4.407E-4	28	1432	TLK2,TRAF7,HDAC4,MARK3,ASH1L,DYRK1A,NSD1,SRPK2,SIN3A,BCL11A,PTEN,KMT2E,TEK,ADNP,CREBBP,BLK,KMT2C,DIP2A,PPP2R5D,LDB1,KANSL1,NUP155,NRXN1,KMT5B,SETD5,NCOA1,PAX5,CTNNB1
GO: Biological Process	GO:0070997	neuron death		7.726E-7	3.069E-3	5.019E-5	4.449E-4	16	515	GABRB2,GABRB3,HDAC4,MAPT,BAG5,SRPK2,GRIN2B,ADNP,CRHR1,SYNGAP1,CORO1A,STXBP1,PPP5C,SCN2A,KCNMA1,CTNNB1
GO: Biological Process	GO:0000904	cell morphogenesis involved in differentiation		7.835E-7	3.112E-3	5.019E-5	4.449E-4	24	1100	DPYSL2,SPAST,DSCAM,MAP1A,MAPT,WNT3,POU3F2,SIN3A,BCL11A,LRRC4C,PTEN,TEK,ADNP,SHANK3,SYNGAP1,DIP2A,CORO1A,STXBP1,SHANK2,NRXN1,FOXP1,NKX2-2,CTNNB1,TBR1
GO: Biological Process	GO:0034329	cell junction assembly		8.129E-7	3.229E-3	5.125E-5	4.543E-4	16	517	GABRB2,GABRB3,SPAST,DSCAM,MAPT,PKP4,PTEN,TEK,ADNP,SHANK3,LDB1,SHANK2,NRXN1,SETD5,NEGR1,CTNNB1
GO: Biological Process	GO:0061564	axon development		8.723E-7	3.465E-3	5.414E-5	4.799E-4	20	797	DPYSL2,SPAST,DSCAM,MAP1A,MAPT,WNT3,POU3F2,SIN3A,BCL11A,LRRC4C,PTEN,ADNP,SHANK3,SYNGAP1,CORO1A,STXBP1,NRXN1,FOXP1,NKX2-2,TBR1
GO: Biological Process	GO:0021543	pallium development		1.136E-6	4.513E-3	6.944E-5	6.155E-4	11	240	XRN2,FOXP2,POU3F2,GRIN2B,KDM6B,PTEN,NCOA1,PPP1R9B,PAX5,CTNNB1,TBR1
GO: Biological Process	GO:0048638	regulation of developmental growth		1.465E-6	5.821E-3	8.820E-5	7.818E-4	15	476	DPYSL2,TCF7L2,SPAST,DSCAM,MAPT,WNT3,POU3F2,SIN3A,BCL11A,PTEN,ADNP,KMT5B,FOXP1,MBD5,RAI1
GO: Biological Process	GO:0099084	postsynaptic specialization organization		1.553E-6	6.169E-3	9.207E-5	8.162E-4	6	51	ZMYND8,PTEN,SHANK3,SYNGAP1,SHANK2,NRXN1
GO: Biological Process	GO:0034765	regulation of ion transmembrane transport		1.762E-6	6.999E-3	1.029E-4	9.123E-4	18	687	CACNA1E,ANK2,GRIA2,GRIN2B,PTEN,COA8,SHANK3,CRHR1,TMEM33,CORO1A,SHANK2,NRXN1,SCN1A,SCN2A,KCNMA1,KCNN2,KCNQ3,CACNA2D3
GO: Biological Process	GO:0032989	cellular component morphogenesis		1.904E-6	7.564E-3	1.085E-4	9.619E-4	24	1157	DPYSL2,SPAST,DSCAM,MAP1A,MAPT,WNT3,POU3F2,SIN3A,BCL11A,LRRC4C,PTEN,ADNP,SHANK3,SYNGAP1,DIP2A,CORO1A,STXBP1,SHANK2,NRXN1,FOXP1,TAOK1,NKX2-2,CTNNB1,TBR1
GO: Biological Process	GO:0034762	regulation of transmembrane transport		1.912E-6	7.596E-3	1.085E-4	9.619E-4	18	691	CACNA1E,ANK2,GRIA2,GRIN2B,PTEN,COA8,SHANK3,CRHR1,TMEM33,CORO1A,SHANK2,NRXN1,SCN1A,SCN2A,KCNMA1,KCNN2,KCNQ3,CACNA2D3
GO: Biological Process	GO:0008306	associative learning		2.070E-6	8.223E-3	1.158E-4	1.027E-3	8	119	CACNA1E,DEAF1,MAP1A,GRIN2B,CRHR1,SYNGAP1,SLC6A1,TBR1
GO: Biological Process	GO:0021953	central nervous system neuron differentiation		2.150E-6	8.542E-3	1.186E-4	1.052E-3	12	310	SPAST,MAPT,WNT3,SIN3A,PTEN,SHANK3,CORO1A,LDB1,NRXN1,NKX2-2,CTNNB1,TBR1
GO: Biological Process	GO:0008361	regulation of cell size		2.212E-6	8.788E-3	1.204E-4	1.067E-3	11	257	DPYSL2,SPAST,DSCAM,MAPT,WNT3,SIN3A,BCL11A,PTEN,ADNP,SHANK3,KCNMA1
GO: Biological Process	GO:0048511	rhythmic process		2.483E-6	9.863E-3	1.333E-4	1.181E-3	14	433	GABRB3,KDM5B,DYRK1A,SIN3A,GRIN2B,PTEN,ADNP,CREBBP,NRXN1,SCN1A,KCNMA1,NCOA1,RORB,RAI1
GO: Biological Process	GO:0006479	protein methylation		2.862E-6	1.137E-2	1.496E-4	1.326E-3	10	213	ASH1L,NSD1,KMT2E,CREBBP,KMT2C,SATB1,KMT5B,SETD5,PAX5,CTNNB1
GO: Biological Process	GO:0008213	protein alkylation		2.862E-6	1.137E-2	1.496E-4	1.326E-3	10	213	ASH1L,NSD1,KMT2E,CREBBP,KMT2C,SATB1,KMT5B,SETD5,PAX5,CTNNB1
GO: Biological Process	GO:0060179	male mating behavior		3.070E-6	1.219E-2	1.583E-4	1.404E-3	4	15	HDAC4,PTEN,NCOA1,PPP1R9B
GO: Biological Process	GO:0060079	excitatory postsynaptic potential		3.374E-6	1.340E-2	1.718E-4	1.523E-3	8	127	CELF4,ZMYND8,GRIA2,GRIN2B,PTEN,SHANK3,SHANK2,NRXN1
GO: Biological Process	GO:0021782	glial cell development		3.520E-6	1.398E-2	1.770E-4	1.569E-3	10	218	TCF7L2,MAP1A,MAPT,POU3F2,PTEN,SKI,GFAP,KCNQ3,NKX2-2,DYNC1H1
GO: Biological Process	GO:0060341	regulation of cellular localization		3.595E-6	1.428E-2	1.785E-4	1.582E-3	22	1034	CACNA1E,TCF7L2,ANK2,MAP1A,MAPT,MFHAS1,TM9SF4,ZMYND8,SIN3A,PTEN,TEK,SHANK3,CRHR1,BLK,CORO1A,STXBP1,NRXN1,PINX1,PPP1R9B,GNAI1,CTNNB1,DYNC1H1
GO: Biological Process	GO:0098815	modulation of excitatory postsynaptic potential		4.098E-6	1.628E-2	2.004E-4	1.777E-3	6	60	CELF4,ZMYND8,PTEN,SHANK3,SHANK2,NRXN1
GO: Biological Process	GO:0050770	regulation of axonogenesis		4.138E-6	1.644E-2	2.004E-4	1.777E-3	10	222	SPAST,DSCAM,MAPT,WNT3,POU3F2,BCL11A,LRRC4C,PTEN,ADNP,SYNGAP1
GO: Biological Process	GO:0043269	regulation of ion transport		4.675E-6	1.857E-2	2.229E-4	1.976E-3	29	1665	CACNA1E,KDM5B,DPYSL2,TCF7L2,ANK2,TM9SF4,GRIA2,GRIN2B,ADTRP,PTEN,TEK,RFX3,COA8,SHANK3,CRHR1,TMEM33,BLK,SLC6A1,CORO1A,STXBP1,SHANK2,NRXN1,SCN1A,SCN2A,KCNMA1,KCNN2,KCNQ3,CTNNB1,CACNA2D3
GO: Biological Process	GO:0034968	histone lysine methylation		4.760E-6	1.891E-2	2.229E-4	1.976E-3	8	133	ASH1L,NSD1,KMT2E,KMT2C,KMT5B,SETD5,PAX5,CTNNB1
GO: Biological Process	GO:0007626	locomotory behavior		4.770E-6	1.895E-2	2.229E-4	1.976E-3	12	335	CACNA1E,DSCAM,MAPT,POGZ,PTEN,SHANK3,CRHR1,SYNGAP1,SETD5,NEGR1,SCN1A,KCNMA1
GO: Biological Process	GO:1901214	regulation of neuron death		5.238E-6	2.081E-2	2.419E-4	2.145E-3	14	462	GABRB2,GABRB3,HDAC4,MAPT,SRPK2,GRIN2B,ADNP,CRHR1,SYNGAP1,CORO1A,STXBP1,PPP5C,KCNMA1,CTNNB1
GO: Biological Process	GO:0040007	growth		5.532E-6	2.197E-2	2.525E-4	2.239E-3	27	1496	KDM5B,DPYSL2,TCF7L2,SPAST,DSCAM,FOXP2,MAPT,WNT3,POU3F2,SIN3A,BCL11A,KDM6B,PTEN,ADNP,TBL1XR1,SHANK3,PTK7,WNT5B,KMT2C,SHANK2,KMT5B,ANKRD11,FOXP1,PPP1R9B,CTNNB1,MBD5,RAI1
GO: Biological Process	GO:0006338	chromatin remodeling		6.110E-6	2.427E-2	2.758E-4	2.445E-3	10	232	KDM5B,HDAC4,ASH1L,CHD8,KDM6B,PHF2,ARID1B,SATB1,SMARCC2,DNMT3A
GO: Biological Process	GO:0000902	cell morphogenesis		7.095E-6	2.818E-2	3.166E-4	2.807E-3	26	1426	DPYSL2,SPAST,DSCAM,MAP1A,MAPT,WNT3,POU3F2,SIN3A,BCL11A,LRRC4C,PTEN,TEK,ADNP,SHANK3,SYNGAP1,WNT5B,DIP2A,CORO1A,STXBP1,SHANK2,NRXN1,FOXP1,TAOK1,NKX2-2,CTNNB1,TBR1
GO: Biological Process	GO:0035176	social behavior		7.183E-6	2.853E-2	3.170E-4	2.810E-3	6	66	GABRB3,CHD8,PTEN,SHANK3,SHANK2,NRXN1
GO: Biological Process	GO:0060992	response to fungicide		8.527E-6	3.387E-2	3.693E-4	3.273E-3	4	19	KDM5B,GRIA2,GRIN2B,KDM6B
GO: Biological Process	GO:0051703	biological process involved in intraspecies interaction between organisms		8.553E-6	3.397E-2	3.693E-4	3.273E-3	6	68	GABRB3,CHD8,PTEN,SHANK3,SHANK2,NRXN1
GO: Biological Process	GO:0051960	regulation of nervous system development		9.393E-6	3.731E-2	4.012E-4	3.556E-3	16	626	TCF7L2,SPAST,DSCAM,MAPT,WNT3,BCL11A,PTEN,SKI,ADNP,GFAP,SHANK3,SYNGAP1,NRXN1,ELAVL3,NKX2-2,CTNNB1
GO: Biological Process	GO:0060292	long-term synaptic depression		1.132E-5	4.494E-2	4.781E-4	4.238E-3	5	42	MAPT,PTEN,SHANK3,STXBP1,SHANK2
GO: Biological Process	GO:0030534	adult behavior		1.182E-5	4.694E-2	4.847E-4	4.296E-3	9	198	MAPT,PTEN,SHANK3,CRHR1,SHANK2,NRXN1,SCN1A,KCNMA1,PAX5
GO: Biological Process	GO:0042297	vocal learning		1.184E-5	4.701E-2	4.847E-4	4.296E-3	3	7	FOXP2,SHANK3,NRXN1
GO: Biological Process	GO:0098596	imitative learning		1.184E-5	4.701E-2	4.847E-4	4.296E-3	3	7	FOXP2,SHANK3,NRXN1
GO: Cellular Component	GO:0043005	neuron projection		2.482E-11	1.137E-8	1.137E-8	7.623E-8	40	1768	GABRB2,GABRB3,DPYSL2,SPAST,ANK2,DSCAM,MAP1A,MAPT,PTBP2,MARK3,ZMYND8,DYRK1A,GRIA2,GRIN2B,PTEN,ADNP,SHANK3,CRHR1,SYNGAP1,CKB,SLC6A1,PRR12,DIP2A,CORO1A,STXBP1,SHANK2,PPP5C,NRXN1,NEGR1,NTM,SCN1A,SCN2A,KCNMA1,KCNN2,NCOA1,KCNQ3,PPP1R9B,CTNNB1,DYNC1H1,KLC1
GO: Cellular Component	GO:0000785	chromatin		1.865E-10	8.542E-8	2.959E-8	1.984E-7	33	1326	MYT1L,TCF4,MMS22L,TCF7L2,DEAF1,FOXP2,PHF12,ASH1L,NSD1,SRPK2,POU3F2,POGZ,SIN3A,KMT2E,ADNP,RFX3,CREBBP,SOX7,ARID1B,LDB1,SATB1,NKX2-4,SETD5,MKX,NCOA1,SMARCC2,FOXP1,RORB,NR3C2,NKX2-2,PAX5,CTNNB1,DNMT3A
GO: Cellular Component	GO:0098794	postsynapse		1.938E-10	8.877E-8	2.959E-8	1.984E-7	26	833	GABRB2,GABRB3,CACNA1E,ANK2,MAP1A,MAPT,PKP4,ZMYND8,GRIA2,BCL11A,GRIN2B,LRRC4C,PTEN,SHANK3,CRHR1,SYNGAP1,SLC6A1,PRR12,DIP2A,STXBP1,SHANK2,KCNMA1,KCNN2,PPP1R9B,NR3C2,CTNNB1
GO: Cellular Component	GO:0036477	somatodendritic compartment		5.059E-10	2.317E-7	5.792E-8	3.884E-7	31	1226	CACNA1E,DPYSL2,DSCAM,MAP1A,MAPT,PTBP2,MARK3,ZMYND8,DYRK1A,GRIA2,GRIN2B,PTEN,ADNP,SHANK3,CRHR1,SYNGAP1,CKB,SLC6A1,DIP2A,SHANK2,PPP5C,NRXN1,NEGR1,SCN1A,KCNMA1,KCNN2,KCNQ3,PPP1R9B,CTNNB1,DYNC1H1,KLC1
GO: Cellular Component	GO:0005694	chromosome		8.291E-10	3.797E-7	7.595E-8	5.092E-7	39	1900	MYT1L,TCF4,MMS22L,TCF7L2,DEAF1,FOXP2,PHF12,ASH1L,NSD1,SRPK2,POU3F2,POGZ,SIN3A,XRCC3,KMT2E,ADNP,RFX3,CREBBP,PHF2,SOX7,ARID1B,LDB1,KANSL1,SATB1,NKX2-4,KMT5B,SETD5,MKX,NCOA1,PINX1,SMARCC2,FOXP1,RORB,NR3C2,NKX2-2,PAX5,CTNNB1,MBD5,DNMT3A
GO: Cellular Component	GO:0045202	synapse		1.059E-9	4.848E-7	8.080E-8	5.418E-7	36	1662	GABRB2,GABRB3,CACNA1E,DPYSL2,ANK2,HDAC4,DSCAM,MAP1A,MAPT,PKP4,ZMYND8,GRIA2,BCL11A,GRIN2B,LRRC4C,PTEN,SHANK3,CRHR1,SYNGAP1,SLC6A1,PRR12,DIP2A,CORO1A,STXBP1,SHANK2,NRXN1,CADPS,NTM,SCN1A,SCN2A,KCNMA1,KCNN2,KCNQ3,PPP1R9B,NR3C2,CTNNB1
GO: Cellular Component	GO:0030425	dendrite		1.129E-8	5.169E-6	6.461E-7	4.332E-6	24	868	DPYSL2,DSCAM,MAP1A,MAPT,MARK3,ZMYND8,DYRK1A,GRIA2,GRIN2B,PTEN,ADNP,SHANK3,CRHR1,SYNGAP1,CKB,DIP2A,SHANK2,PPP5C,NEGR1,KCNMA1,KCNN2,KCNQ3,PPP1R9B,CTNNB1
GO: Cellular Component	GO:0097447	dendritic tree		1.129E-8	5.169E-6	6.461E-7	4.332E-6	24	868	DPYSL2,DSCAM,MAP1A,MAPT,MARK3,ZMYND8,DYRK1A,GRIA2,GRIN2B,PTEN,ADNP,SHANK3,CRHR1,SYNGAP1,CKB,DIP2A,SHANK2,PPP5C,NEGR1,KCNMA1,KCNN2,KCNQ3,PPP1R9B,CTNNB1
GO: Cellular Component	GO:0097060	synaptic membrane		1.716E-8	7.858E-6	7.968E-7	5.342E-6	18	498	GABRB2,GABRB3,CACNA1E,ANK2,GRIA2,GRIN2B,LRRC4C,PTEN,SHANK3,SLC6A1,STXBP1,SHANK2,NRXN1,SCN1A,SCN2A,KCNMA1,PPP1R9B,CTNNB1
GO: Cellular Component	GO:0043025	neuronal cell body		1.740E-8	7.968E-6	7.968E-7	5.342E-6	23	818	CACNA1E,DPYSL2,DSCAM,MAP1A,MAPT,PTBP2,GRIA2,GRIN2B,ADNP,CRHR1,CKB,SLC6A1,SHANK2,PPP5C,NRXN1,NEGR1,SCN1A,KCNMA1,KCNN2,KCNQ3,PPP1R9B,DYNC1H1,KLC1
GO: Cellular Component	GO:0030424	axon		3.017E-8	1.382E-5	1.200E-6	8.047E-6	24	914	GABRB3,DPYSL2,SPAST,DSCAM,MAP1A,MAPT,PTBP2,DYRK1A,GRIA2,GRIN2B,ADNP,SLC6A1,CORO1A,STXBP1,SHANK2,NRXN1,NTM,SCN1A,SCN2A,KCNMA1,KCNQ3,PPP1R9B,DYNC1H1,KLC1
GO: Cellular Component	GO:0044297	cell body		3.144E-8	1.440E-5	1.200E-6	8.047E-6	24	916	CACNA1E,DPYSL2,DSCAM,MAP1A,MAPT,PTBP2,GRIA2,GRIN2B,ADNP,GFAP,CRHR1,CKB,SLC6A1,SHANK2,PPP5C,NRXN1,NEGR1,SCN1A,KCNMA1,KCNN2,KCNQ3,PPP1R9B,DYNC1H1,KLC1
GO: Cellular Component	GO:0099572	postsynaptic specialization		6.859E-8	3.142E-5	2.417E-6	1.620E-5	17	485	GABRB2,GABRB3,ANK2,MAP1A,MAPT,PKP4,GRIA2,BCL11A,GRIN2B,LRRC4C,SHANK3,SYNGAP1,PRR12,SHANK2,PPP1R9B,NR3C2,CTNNB1
GO: Cellular Component	GO:0140513	nuclear protein-containing complex		2.301E-7	1.054E-4	7.528E-6	5.048E-5	28	1340	TCF4,MMS22L,TCF7L2,DEAF1,HDAC4,PTBP2,PHF12,ASH1L,NSD1,CHD8,SIN3A,XRCC3,MED13L,KDM6B,ADNP,TBL1XR1,CREBBP,PHF21A,WAC,KMT2C,ARID1B,LDB1,KANSL1,NUP155,SETD5,ASXL3,SMARCC2,CTNNB1
GO: Cellular Component	GO:0005667	transcription regulator complex		2.987E-7	1.368E-4	9.121E-6	6.116E-5	17	538	TCF4,TCF7L2,DEAF1,HDAC4,PHF12,POU3F2,SIN3A,MED13L,SKI,ADNP,RFX3,TBL1XR1,CREBBP,LDB1,MKX,PAX5,CTNNB1
GO: Cellular Component	GO:0070369	beta-catenin-TCF7L2 complex		3.555E-7	1.628E-4	1.018E-5	6.823E-5	3	3	TCF4,TCF7L2,CTNNB1
GO: Cellular Component	GO:0014069	postsynaptic density		8.224E-7	3.767E-4	2.093E-5	1.403E-4	15	451	ANK2,MAP1A,MAPT,PKP4,GRIA2,BCL11A,GRIN2B,LRRC4C,SHANK3,SYNGAP1,PRR12,SHANK2,PPP1R9B,NR3C2,CTNNB1
GO: Cellular Component	GO:0032279	asymmetric synapse		8.224E-7	3.767E-4	2.093E-5	1.403E-4	15	451	ANK2,MAP1A,MAPT,PKP4,GRIA2,BCL11A,GRIN2B,LRRC4C,SHANK3,SYNGAP1,PRR12,SHANK2,PPP1R9B,NR3C2,CTNNB1
GO: Cellular Component	GO:0099699	integral component of synaptic membrane		1.173E-6	5.370E-4	2.826E-5	1.895E-4	11	239	GABRB2,GABRB3,CACNA1E,GRIA2,GRIN2B,LRRC4C,SLC6A1,NRXN1,SCN1A,SCN2A,KCNMA1
GO: Cellular Component	GO:0045211	postsynaptic membrane		1.329E-6	6.087E-4	3.044E-5	2.041E-4	13	349	GABRB2,GABRB3,CACNA1E,ANK2,GRIA2,GRIN2B,LRRC4C,PTEN,SHANK3,SLC6A1,SHANK2,KCNMA1,CTNNB1
GO: Cellular Component	GO:0071664	catenin-TCF7L2 complex		1.405E-6	6.433E-4	3.063E-5	2.054E-4	3	4	TCF4,TCF7L2,CTNNB1
GO: Cellular Component	GO:0098984	neuron to neuron synapse		1.737E-6	7.956E-4	3.616E-5	2.425E-4	15	479	ANK2,MAP1A,MAPT,PKP4,GRIA2,BCL11A,GRIN2B,LRRC4C,SHANK3,SYNGAP1,PRR12,SHANK2,PPP1R9B,NR3C2,CTNNB1
GO: Cellular Component	GO:1990907	beta-catenin-TCF complex		2.330E-6	1.067E-3	4.640E-5	3.112E-4	4	14	TCF4,TCF7L2,LDB1,CTNNB1
GO: Cellular Component	GO:0099240	intrinsic component of synaptic membrane		2.561E-6	1.173E-3	4.887E-5	3.277E-4	11	259	GABRB2,GABRB3,CACNA1E,GRIA2,GRIN2B,LRRC4C,SLC6A1,NRXN1,SCN1A,SCN2A,KCNMA1
GO: Cellular Component	GO:0099056	integral component of presynaptic membrane		2.979E-6	1.365E-3	5.458E-5	3.660E-4	8	124	CACNA1E,GRIA2,GRIN2B,SLC6A1,NRXN1,SCN1A,SCN2A,KCNMA1
GO: Cellular Component	GO:0034702	ion channel complex		3.776E-6	1.729E-3	6.651E-5	4.460E-4	12	325	GABRB2,GABRB3,CACNA1E,GRIA2,GRIN2B,SHANK3,SHANK2,SCN1A,SCN2A,KCNMA1,KCNQ3,CACNA2D3
GO: Cellular Component	GO:0042734	presynaptic membrane		4.417E-6	2.023E-3	7.493E-5	5.024E-4	10	222	CACNA1E,GRIA2,GRIN2B,SLC6A1,STXBP1,NRXN1,SCN1A,SCN2A,KCNMA1,CTNNB1
GO: Cellular Component	GO:0043197	dendritic spine		5.591E-6	2.561E-3	9.146E-5	6.132E-4	11	281	MAPT,ZMYND8,GRIA2,GRIN2B,PTEN,SHANK3,CRHR1,DIP2A,SHANK2,KCNN2,PPP1R9B
GO: Cellular Component	GO:0098889	intrinsic component of presynaptic membrane		6.258E-6	2.866E-3	9.761E-5	6.545E-4	8	137	CACNA1E,GRIA2,GRIN2B,SLC6A1,NRXN1,SCN1A,SCN2A,KCNMA1
GO: Cellular Component	GO:0044309	neuron spine		6.394E-6	2.928E-3	9.761E-5	6.545E-4	11	285	MAPT,ZMYND8,GRIA2,GRIN2B,PTEN,SHANK3,CRHR1,DIP2A,SHANK2,KCNN2,PPP1R9B
GO: Cellular Component	GO:1902495	transmembrane transporter complex		8.015E-6	3.671E-3	1.184E-4	7.940E-4	12	350	GABRB2,GABRB3,CACNA1E,GRIA2,GRIN2B,SHANK3,SHANK2,SCN1A,SCN2A,KCNMA1,KCNQ3,CACNA2D3
GO: Cellular Component	GO:0043194	axon initial segment		1.091E-5	4.997E-3	1.562E-4	1.047E-3	4	20	MAP1A,SCN1A,SCN2A,KCNQ3
GO: Cellular Component	GO:0150034	distal axon		1.216E-5	5.567E-3	1.644E-4	1.102E-3	14	494	GABRB3,DPYSL2,DSCAM,MAP1A,MAPT,PTBP2,GRIA2,GRIN2B,STXBP1,SHANK2,NRXN1,KCNMA1,PPP1R9B,KLC1
GO: Cellular Component	GO:1990351	transporter complex		1.221E-5	5.590E-3	1.644E-4	1.102E-3	12	365	GABRB2,GABRB3,CACNA1E,GRIA2,GRIN2B,SHANK3,SHANK2,SCN1A,SCN2A,KCNMA1,KCNQ3,CACNA2D3
GO: Cellular Component	GO:0030426	growth cone		7.092E-5	3.248E-2	9.280E-4	6.223E-3	9	247	DPYSL2,DSCAM,MAPT,PTBP2,GRIA2,SHANK2,NRXN1,PPP1R9B,KLC1
GO: Cellular Component	GO:0099092	postsynaptic density, intracellular component		7.578E-5	3.471E-2	9.641E-4	6.464E-3	4	32	SHANK3,SYNGAP1,NR3C2,CTNNB1
GO: Cellular Component	GO:0034708	methyltransferase complex		8.060E-5	3.692E-2	9.977E-4	6.690E-3	6	100	NSD1,CHD8,KDM6B,KMT2C,KANSL1,TRMT61A
GO: Cellular Component	GO:0030427	site of polarized growth		8.781E-5	4.022E-2	1.057E-3	7.086E-3	9	254	DPYSL2,DSCAM,MAPT,PTBP2,GRIA2,SHANK2,NRXN1,PPP1R9B,KLC1
GO: Cellular Component	GO:0048786	presynaptic active zone		8.999E-5	4.122E-2	1.057E-3	7.086E-3	6	102	STXBP1,SHANK2,NRXN1,KCNMA1,NR3C2,CTNNB1
GO: Cellular Component	GO:0098978	glutamatergic synapse		9.967E-5	4.565E-2	1.141E-3	7.652E-3	13	525	GRIA2,GRIN2B,LRRC4C,SHANK3,SYNGAP1,CORO1A,STXBP1,SHANK2,NRXN1,CADPS,SCN2A,KCNMA1,NR3C2
Pathway	1270433	Chromatin organization	BioSystems: REACTOME	4.676E-10	4.746E-7	2.373E-7	1.780E-6	16	279	KDM5B,ASH1L,NSD1,KDM6B,KMT2E,TBL1XR1,CREBBP,PHF21A,PHF2,KMT2C,ARID1B,KANSL1,KMT5B,NCOA1,SMARCC2,DNMT3A
Pathway	1270434	Chromatin modifying enzymes	BioSystems: REACTOME	4.676E-10	4.746E-7	2.373E-7	1.780E-6	16	279	KDM5B,ASH1L,NSD1,KDM6B,KMT2E,TBL1XR1,CREBBP,PHF21A,PHF2,KMT2C,ARID1B,KANSL1,KMT5B,NCOA1,SMARCC2,DNMT3A
Pathway	1268763	Neuronal System	BioSystems: REACTOME	1.181E-8	1.199E-5	3.996E-6	2.997E-5	16	349	GABRB2,GABRB3,CACNA1E,GRIA2,GRIN2B,SHANK3,SLC6A1,AP2S1,STXBP1,SHANK2,NRXN1,KCNMA1,KCNN2,KCNQ3,GNAI1,CACNA2D3
Pathway	1270302	Developmental Biology	BioSystems: REACTOME	7.397E-6	7.508E-3	1.545E-3	1.159E-2	23	1078	TCF4,DPYSL2,ANK2,MARK3,PKP4,GRIN2B,MED13L,TEK,TBL1XR1,CREBBP,SHANK3,SYNGAP1,KMT2C,AP2S1,PPP2R5D,PPP5C,SCN1A,SCN2A,NCOA1,KCNQ3,FOXP1,NKX2-2,CTNNB1
Pathway	1268766	Transmission across Chemical Synapses	BioSystems: REACTOME	7.612E-6	7.727E-3	1.545E-3	1.159E-2	10	217	GABRB2,GABRB3,CACNA1E,GRIA2,GRIN2B,SLC6A1,AP2S1,STXBP1,GNAI1,CACNA2D3
Pathway	M19428	Wnt signaling pathway	MSigDB C2 BIOCARTA (v7.5.1)	2.289E-5	2.324E-2	3.873E-3	2.905E-2	8	150	TCF7L2,WNT3,CHD8,TBL1XR1,CREBBP,WNT5B,PPP2R5D,CTNNB1
Pathway	PW:0000201	canonical Wnt signaling	Pathway Ontology	2.869E-5	2.913E-2	4.161E-3	3.121E-2	5	46	TCF7L2,WNT3,CREBBP,WNT5B,CTNNB1
Pathway	1270325	Interaction between L1 and Ankyrins	BioSystems: REACTOME	8.395E-5	8.521E-2	9.813E-3	7.360E-2	4	30	ANK2,SCN1A,SCN2A,KCNQ3
Pathway	1427850	Interactions of neurexins and neuroligins at synapses	BioSystems: REACTOME	8.904E-5	9.038E-2	9.813E-3	7.360E-2	5	58	GRIN2B,SHANK3,STXBP1,SHANK2,NRXN1
Pathway	82956	Lysine degradation	BioSystems: KEGG	9.668E-5	9.813E-2	9.813E-3	7.360E-2	5	59	ASH1L,NSD1,KMT2E,KMT2C,KMT5B
Disease	C1535926	Neurodevelopmental Disorders	DisGeNET Curated	3.250E-60	1.398E-56	1.398E-56	1.251E-55	39	93	MYT1L,GABRB2,GABRB3,TCF4,TCF7L2,SPAST,ANK2,DSCAM,ASH1L,DYRK1A,CHD2,POGZ,GRIN2B,MED13L,PTEN,KMT2E,ADNP,TBL1XR1,TRIP12,PTK7,WAC,SYNGAP1,SLC6A1,PHF2,KMT2C,ARID1B,PPP2R5D,STXBP1,KMT5B,SETD5,ASXL3,SCN1A,SCN2A,ANKRD11,FOXP1,PAX5,CTNNB1,TBR1,CACNA2D3
Disease	C1535926	Neurodevelopmental Disorders	DisGeNET BeFree	1.365E-42	5.872E-39	2.936E-39	2.626E-38	49	485	MYT1L,GABRB2,GABRB3,TLK2,CACNA1E,TCF4,KDM5B,TCF7L2,DEAF1,FOXP2,MAPT,ASH1L,DYRK1A,GRIA2,CHD8,CHD2,POGZ,BCL11A,GRIN2B,LRRC4C,KDM6B,PTEN,KMT2E,TRIP12,CREBBP,GFAP,SHANK3,PHF21A,SYNGAP1,PRR12,ARID1B,STXBP1,SHANK2,NRXN1,SETD5,SCN1A,SCN2A,MACROD2,KCNMA1,ANKRD11,SMARCC2,KCNQ3,FOXP1,TAOK1,RORB,CTNNB1,TBR1,MBD5,RAI1
Disease	C3714756	Intellectual Disability	DisGeNET BeFree	3.347E-40	1.440E-36	4.800E-37	4.293E-36	65	1219	MYT1L,GABRB2,GABRB3,TLK2,UBR1,TCF4,KDM5B,DEAF1,SPAST,TCF20,HDAC4,DSCAM,FOXP2,MAPT,MFHAS1,ASH1L,DYRK1A,NSD1,GRIA2,POU3F2,CHD8,CHD2,POGZ,SIN3A,BCL11A,GRIN2B,MED13L,PTEN,SKI,ADNP,TBL1XR1,TRIP12,CREBBP,SHANK3,PHF21A,WAC,SYNGAP1,SLC6A1,PRR12,KMT2C,ARID1B,PPP2R5D,STXBP1,SHANK2,KANSL1,NRXN1,KMT5B,SETD5,NEGR1,ASXL3,SCN1A,SCN2A,MACROD2,KCNMA1,ANKRD11,SMARCC2,KCNQ3,FOXP1,RORB,CTNNB1,TBR1,MBD5,DYNC1H1,RAI1,…
Disease	C1510586	Autism Spectrum Disorders	DisGeNET BeFree	8.389E-36	3.609E-32	9.022E-33	8.069E-32	57	1018	GABRB3,TLK2,TCF4,KDM5B,XRN2,CELF4,DEAF1,SPAST,TCF20,ANK2,HDAC4,FOXP2,MAPT,ASH1L,DYRK1A,NSD1,GRIA2,POU3F2,CHD8,CHD2,POGZ,SIN3A,GRIN2B,PTEN,ADNP,TBL1XR1,TRIP12,CREBBP,GFAP,SHANK3,PHF21A,SYNGAP1,SLC6A1,KMT2C,DIP2A,ARID1B,PPP2R5D,SHANK2,NRXN1,KMT5B,SETD5,NEGR1,NTM,ASXL3,SCN1A,SCN2A,MACROD2,KCNMA1,ANKRD11,FOXP1,TAOK1,NR3C2,CTNNB1,TBR1,MBD5,RAI1,DNMT3A
Disease	C0004352	Autistic Disorder	DisGeNET BeFree	1.914E-27	8.234E-24	1.647E-24	1.473E-23	46	864	MYT1L,GABRB2,GABRB3,TCF4,KDM5B,DPYSL2,CELF4,DEAF1,ANK2,DSCAM,FOXP2,DYRK1A,NSD1,GRIA2,CHD8,POGZ,GRIN2B,LRRC4C,PTEN,ADNP,TBL1XR1,TRIP12,CREBBP,GFAP,SHANK3,WAC,SYNGAP1,DIP2A,ARID1B,PPP2R5D,STXBP1,SHANK2,NRXN1,NEGR1,SCN1A,SCN2A,MACROD2,ANKRD11,FOXP1,CTNNB1,TBR1,MBD5,DYNC1H1,RAI1,DNMT3A,HDLBP
Disease	C0524528	Pervasive Development Disorder	DisGeNET BeFree	5.475E-27	2.355E-23	3.925E-24	3.511E-23	32	328	GABRB3,TCF4,SPAST,TCF20,FOXP2,MAPT,CHD8,CHD2,POGZ,GRIN2B,PTEN,ADNP,TBL1XR1,GFAP,SHANK3,PHF21A,SLC6A1,KMT2C,ARID1B,PPP2R5D,SHANK2,NRXN1,KMT5B,SETD5,SCN1A,SCN2A,MACROD2,FOXP1,NR3C2,CTNNB1,TBR1,MBD5
Disease	C3714756	Intellectual Disability	DisGeNET Curated	2.993E-26	1.288E-22	1.839E-23	1.645E-22	35	447	MYT1L,GABRB2,TLK2,CACNA1E,DEAF1,TCF20,HDAC4,ASH1L,NSD1,GRIA2,CHD8,POGZ,SIN3A,BCL11A,GRIN2B,MED13L,KDM6B,PTEN,KMT2E,SHANK3,PHF21A,WAC,SYNGAP1,PRR12,KMT2C,PPP2R5D,SHANK2,KANSL1,NRXN1,SCN1A,SMARCC2,TAOK1,DYNC1H1,RAI1,DNMT3A
Disease	C0557874	Global developmental delay	DisGeNET BeFree	4.589E-26	1.974E-22	2.468E-23	2.207E-22	39	608	GABRB3,TRAF7,TCF4,KDM5B,SPAST,TCF20,HDAC4,FOXP2,MAPT,ASH1L,DYRK1A,NSD1,POU3F2,CHD8,POGZ,BCL11A,GRIN2B,LRRC4C,MED13L,KDM6B,PTEN,KMT2E,TBL1XR1,SHANK3,PHF21A,ARID1B,STXBP1,NRXN1,NTM,ASXL3,SCN1A,SCN2A,ANKRD11,SMARCC2,KCNQ3,FOXP1,CTNNB1,MBD5,RAI1
Disease	C0424605	Developmental delay (disorder)	DisGeNET BeFree	1.447E-25	6.225E-22	6.917E-23	6.186E-22	37	545	GABRB3,TRAF7,TCF4,KDM5B,TCF20,HDAC4,FOXP2,MAPT,ASH1L,DYRK1A,NSD1,POU3F2,CHD8,POGZ,BCL11A,GRIN2B,LRRC4C,MED13L,KDM6B,PTEN,KMT2E,TBL1XR1,SHANK3,PHF21A,ARID1B,STXBP1,NRXN1,NTM,ASXL3,SCN1A,ANKRD11,SMARCC2,KCNQ3,FOXP1,CTNNB1,MBD5,RAI1
Disease	C0014544	Epilepsy	DisGeNET BeFree	2.890E-18	1.243E-14	1.243E-15	1.112E-14	41	1124	GABRB2,GABRB3,CACNA1E,TCF4,DPYSL2,CELF4,DEAF1,SPAST,ANK2,HDAC4,DSCAM,FOXP2,MAPT,DYRK1A,NSD1,GRIA2,CHD2,POGZ,BCL11A,GRIN2B,PTEN,TBL1XR1,CREBBP,GFAP,SHANK3,SYNGAP1,SLC6A1,STXBP1,KANSL1,NRXN1,SCN1A,SCN2A,KCNMA1,KCNQ3,FOXP1,IRF2BPL,RORB,CTNNB1,MBD5,RAI1,DNMT3A
Disease	C0020796	Profound Mental Retardation	DisGeNET Curated	1.075E-17	4.625E-14	3.558E-15	3.182E-14	18	139	DEAF1,HDAC4,NSD1,CHD8,SIN3A,GRIN2B,MED13L,KDM6B,PTEN,SHANK3,SYNGAP1,SHANK2,KANSL1,NRXN1,SCN1A,DYNC1H1,RAI1,DNMT3A
Disease	C0917816	Mental deficiency	DisGeNET Curated	1.075E-17	4.625E-14	3.558E-15	3.182E-14	18	139	DEAF1,HDAC4,NSD1,CHD8,SIN3A,GRIN2B,MED13L,KDM6B,PTEN,SHANK3,SYNGAP1,SHANK2,KANSL1,NRXN1,SCN1A,DYNC1H1,RAI1,DNMT3A
Disease	C0025363	Mental Retardation, Psychosocial	DisGeNET Curated	1.075E-17	4.625E-14	3.558E-15	3.182E-14	18	139	DEAF1,HDAC4,NSD1,CHD8,SIN3A,GRIN2B,MED13L,KDM6B,PTEN,SHANK3,SYNGAP1,SHANK2,KANSL1,NRXN1,SCN1A,DYNC1H1,RAI1,DNMT3A
Disease	C1510586	Autism Spectrum Disorders	DisGeNET Curated	5.136E-17	2.210E-13	1.578E-14	1.412E-13	15	85	MYT1L,GABRB3,CHD8,CHD2,SIN3A,GRIN2B,TRIP12,SHANK3,DIP2A,NRXN1,SCN1A,ANKRD11,FOXP1,RAI1,DNMT3A
Disease	C0086237	Epilepsy, Cryptogenic	DisGeNET Curated	9.606E-16	4.132E-12	2.431E-13	2.174E-12	14	82	GABRB2,GABRB3,DYRK1A,CHD2,GRIN2B,GFAP,SYNGAP1,SLC6A1,ARID1B,STXBP1,ASXL3,SCN1A,SCN2A,ANKRD11
Disease	C0751111	Awakening Epilepsy	DisGeNET Curated	9.606E-16	4.132E-12	2.431E-13	2.174E-12	14	82	GABRB2,GABRB3,DYRK1A,CHD2,GRIN2B,GFAP,SYNGAP1,SLC6A1,ARID1B,STXBP1,ASXL3,SCN1A,SCN2A,ANKRD11
Disease	C0236018	Aura	DisGeNET Curated	9.606E-16	4.132E-12	2.431E-13	2.174E-12	14	82	GABRB2,GABRB3,DYRK1A,CHD2,GRIN2B,GFAP,SYNGAP1,SLC6A1,ARID1B,STXBP1,ASXL3,SCN1A,SCN2A,ANKRD11
Disease	C0036857	Severe intellectual disability	DisGeNET BeFree	2.986E-15	1.285E-11	7.137E-13	6.384E-12	17	161	TCF4,ASH1L,MED13L,ADNP,SHANK3,SYNGAP1,ARID1B,STXBP1,SHANK2,NRXN1,ASXL3,SCN1A,SCN2A,FOXP1,CTNNB1,MBD5,DYNC1H1
Disease	C0008073	Developmental Disabilities	DisGeNET BeFree	3.639E-15	1.566E-11	8.240E-13	7.370E-12	22	331	CACNA1E,TCF4,KDM5B,FOXP2,DYRK1A,GRIN2B,MED13L,PTEN,TBL1XR1,CREBBP,SHANK3,SYNGAP1,KMT2C,ARID1B,NRXN1,KMT5B,SCN2A,KCNMA1,KCNQ3,CTNNB1,RAI1,DNMT3A
Disease	C0037769	West Syndrome	DisGeNET BeFree	4.348E-15	1.870E-11	9.352E-13	8.365E-12	15	113	GABRB2,GABRB3,TLK2,HDAC4,CHD2,GRIN2B,SKI,TBL1XR1,CRHR1,STXBP1,SCN1A,SCN2A,CTNNB1,MBD5,DNMT3A
Disease	C0014544	Epilepsy	DisGeNET Curated	5.925E-14	2.549E-10	1.214E-11	1.086E-10	14	109	GABRB2,GABRB3,DYRK1A,CHD2,GRIN2B,GFAP,SYNGAP1,SLC6A1,ARID1B,STXBP1,ASXL3,SCN1A,SCN2A,ANKRD11
Disease	C0004352	Autistic Disorder	DisGeNET Curated	7.438E-13	3.200E-9	1.455E-10	1.301E-9	18	261	GABRB3,KDM5B,FOXP2,NSD1,CHD8,GRIN2B,PTEN,KMT2E,ADNP,TBL1XR1,SHANK3,SYNGAP1,SHANK2,NRXN1,MACROD2,KCNMA1,TBR1,HDLBP
Disease	C0233514	Abnormal behavior	DisGeNET BeFree	1.305E-12	5.612E-9	2.440E-10	2.182E-9	29	820	UBR1,TCF4,DPYSL2,CELF4,DEAF1,HDAC4,MAP1A,FOXP2,MAPT,ASH1L,DYRK1A,NSD1,POU3F2,GRIN2B,PTEN,CREBBP,GFAP,SHANK3,CRHR1,SLC6A1,AP2S1,SHANK2,NRXN1,NEGR1,SCN1A,SCN2A,MACROD2,FOXP1,RAI1
Disease	C0025362	Mental Retardation	DisGeNET BeFree	1.445E-12	6.218E-9	2.591E-10	2.317E-9	23	493	UBR1,TCF4,SPAST,DSCAM,FOXP2,MAPT,DYRK1A,NSD1,GRIN2B,MED13L,PTEN,ADNP,CREBBP,SHANK3,WAC,SYNGAP1,STXBP1,SHANK2,NRXN1,SCN2A,MACROD2,FOXP1,DYNC1H1
Disease	C3887898	Infantile Spasm	DisGeNET BeFree	1.303E-11	5.608E-8	2.243E-9	2.006E-8	11	79	GABRB2,GABRB3,HDAC4,GRIN2B,SKI,CRHR1,STXBP1,SCN1A,SCN2A,CTNNB1,MBD5
Disease	C0241210	Speech Delay	DisGeNET BeFree	2.150E-11	9.248E-8	3.557E-9	3.181E-8	9	43	MYT1L,FOXP2,DYRK1A,MED13L,SHANK3,KANSL1,NRXN1,ASXL3,FOXP1
Disease	C0432072	Dysmorphic features	DisGeNET BeFree	3.259E-11	1.402E-7	5.193E-9	4.645E-8	13	140	TCF4,TCF20,NSD1,MED13L,KDM6B,TBL1XR1,ARID1B,PPP2R5D,NRXN1,SETD5,ASXL3,FOXP1,MBD5
Disease	C0338656	Impaired cognition	DisGeNET BeFree	4.323E-11	1.860E-7	6.641E-9	5.940E-8	35	1368	TCF4,DPYSL2,SPAST,HDAC4,FOXP2,MAPT,MFHAS1,DYRK1A,GRIA2,SRPK2,BCL11A,GIGYF1,GRIN2B,PTEN,ADNP,TBL1XR1,CREBBP,GFAP,COA8,SHANK3,CRHR1,SYNGAP1,STXBP1,SHANK2,NRXN1,SCN1A,SCN2A,KCNMA1,ANKRD11,FOXP1,PPP1R9B,NR3C2,CTNNB1,MMP12,DNMT3A
Disease	C0004936	Mental disorders	DisGeNET BeFree	5.098E-11	2.193E-7	7.563E-9	6.765E-8	26	763	GABRB2,TCF4,DPYSL2,DEAF1,SPAST,HDAC4,MAP1A,FOXP2,DYRK1A,POU3F2,GRIN2B,PTEN,CREBBP,GFAP,SHANK3,CRHR1,SHANK2,NRXN1,NEGR1,SCN1A,SCN2A,MACROD2,KCNMA1,FOXP1,NR3C2,RAI1
Disease	C0543888	Epileptic encephalopathy	DisGeNET BeFree	2.692E-10	1.158E-6	3.860E-8	3.452E-7	12	133	GABRB3,CACNA1E,CHD2,BCL11A,GRIN2B,SLC6A1,STXBP1,SCN1A,SCN2A,KCNQ3,IRF2BPL,MBD5
Disease	C0266617	Congenital anomaly of face	DisGeNET BeFree	3.390E-10	1.458E-6	4.704E-8	4.208E-7	11	106	TCF4,HDAC4,MAPT,POGZ,MED13L,TRIP12,CREBBP,WAC,STXBP1,SETD5,ANKRD11
Disease	C0000768	Congenital Abnormality	DisGeNET BeFree	1.183E-9	5.090E-6	1.591E-7	1.423E-6	29	1091	TCF4,HDAC4,FOXP2,PTBP2,WNT3,DYRK1A,CHD8,SIN3A,MED13L,PTEN,SKI,TEK,TBL1XR1,CREBBP,SHANK3,PTK7,SYNGAP1,CORO1A,ARID1B,STXBP1,KANSL1,NRXN1,SCN1A,KCNMA1,ANKRD11,CTNNB1,TBR1,DYNC1H1,RAI1
Disease	C0036572	Seizures	DisGeNET BeFree	2.341E-9	1.007E-5	2.995E-7	2.678E-6	28	1052	GABRB3,TCF4,ANK2,HDAC4,MAPT,DYRK1A,NSD1,GRIA2,SRPK2,CHD8,CHD2,GRIN2B,PTEN,SKI,GFAP,SHANK3,SYNGAP1,SLC6A1,STXBP1,KANSL1,NRXN1,SCN1A,SCN2A,KCNMA1,KCNQ3,CTNNB1,MMP12,MBD5
Disease	C0221355	Macrocephaly	DisGeNET BeFree	2.367E-9	1.018E-5	2.995E-7	2.678E-6	10	97	DYRK1A,NSD1,CHD8,PTEN,GFAP,PPP2R5D,STXBP1,NTM,ASXL3,DNMT3A
Disease	C0014548	Epilepsy, Generalized	DisGeNET BeFree	3.073E-9	1.322E-5	3.778E-7	3.379E-6	9	73	GABRB3,CHD2,SYNGAP1,SLC6A1,SCN1A,SCN2A,KCNMA1,KCNQ3,RORB
Disease	C0023015	Language Disorders	DisGeNET BeFree	7.190E-9	3.093E-5	8.592E-7	7.685E-6	8	56	CELF4,FOXP2,MAPT,GRIN2B,MED13L,SHANK3,SHANK2,FOXP1
Disease	C0454655	Semantic-Pragmatic Disorder	DisGeNET Curated	8.772E-9	3.774E-5	9.205E-7	8.233E-6	5	11	FOXP2,BCL11A,PTEN,SHANK3,NRXN1
Disease	C0751257	Auditory Processing Disorder, Central	DisGeNET Curated	8.772E-9	3.774E-5	9.205E-7	8.233E-6	5	11	FOXP2,BCL11A,PTEN,SHANK3,NRXN1
Disease	C0023012	Language Delay	DisGeNET Curated	8.772E-9	3.774E-5	9.205E-7	8.233E-6	5	11	FOXP2,BCL11A,PTEN,SHANK3,NRXN1
Disease	C0023014	Language Development Disorders	DisGeNET Curated	8.772E-9	3.774E-5	9.205E-7	8.233E-6	5	11	FOXP2,BCL11A,PTEN,SHANK3,NRXN1
Disease	C0241210	Speech Delay	DisGeNET Curated	8.772E-9	3.774E-5	9.205E-7	8.233E-6	5	11	FOXP2,BCL11A,PTEN,SHANK3,NRXN1
Disease	C0856975	Autistic behavior	DisGeNET BeFree	1.020E-8	4.386E-5	1.044E-6	9.341E-6	7	38	GABRB3,TCF4,PTEN,TBL1XR1,SHANK3,NRXN1,SCN1A
Disease	C0026106	Mild Mental Retardation	DisGeNET BeFree	2.012E-8	8.658E-5	2.013E-6	1.801E-5	9	90	TCF4,CHD2,SIN3A,PTEN,CREBBP,SHANK3,SHANK2,SETD5,RORB
Disease	C0376634	Craniofacial Abnormalities	DisGeNET Curated	2.078E-8	8.939E-5	2.032E-6	1.817E-5	11	156	GABRB3,TCF4,FOXP2,SIN3A,PTEN,SKI,KANSL1,NRXN1,CTNNB1,RAI1,DNMT3A
Disease	C0036341	Schizophrenia	DisGeNET Curated	2.605E-8	1.121E-4	2.490E-6	2.227E-5	24	883	MYT1L,GABRB2,GABRB3,TCF4,TCF7L2,HDAC4,FOXP2,GRIA2,BCL11A,GRIN2B,MDH1,ADNP,GFAP,SHANK3,SYNGAP1,CKB,SLC6A1,MSRA,STXBP1,NRXN1,KCNQ3,PPP1R9B,CTNNB1,RAI1
Disease	C0010606	Adenoid Cystic Carcinoma	DisGeNET Curated	5.095E-8	2.192E-4	4.765E-6	4.262E-5	9	100	FOXP2,NSD1,BCL11A,KDM6B,PTEN,CREBBP,WNT5B,KMT2C,KANSL1
Disease	C0005586	Bipolar Disorder	DisGeNET Curated	7.988E-8	3.436E-4	7.311E-6	6.540E-5	17	477	GABRB2,GABRB3,TCF4,DPYSL2,TCF7L2,DSCAM,GRIA2,SRPK2,POU3F2,GRIN2B,GFAP,CRHR1,SHANK2,NRXN1,SCN2A,KCNQ3,MBD5
Disease	C1842981	NEUROTICISM	DisGeNET BeFree	8.842E-8	3.804E-4	7.925E-6	7.088E-5	10	141	MFHAS1,ASH1L,DYRK1A,GRIN2B,XKR6,CRHR1,BLK,MSRA,KANSL1,NR3C2
Disease	C0035372	Rett Syndrome	DisGeNET BeFree	1.192E-7	5.129E-4	1.047E-5	9.362E-5	12	228	GABRB3,TCF4,GRIA2,GRIN2B,TBL1XR1,CREBBP,GFAP,SHANK3,STXBP1,SCN1A,MBD5,DYNC1H1
Disease	C0014553	Absence Epilepsy	DisGeNET BeFree	1.266E-7	5.445E-4	1.089E-5	9.740E-5	8	80	GABRB3,DYRK1A,GRIA2,GFAP,SLC6A1,SCN1A,KCNQ3,RORB
Disease	C0085584	Encephalopathies	DisGeNET BeFree	1.710E-7	7.355E-4	1.442E-5	1.290E-4	14	334	GABRB3,CHD2,BCL11A,GRIN2B,MDH1,GFAP,SLC6A1,STXBP1,SCN1A,SCN2A,KCNQ3,IRF2BPL,DYNC1H1,DNMT3A
Disease	C0016667	Fragile X Syndrome	DisGeNET BeFree	1.841E-7	7.920E-4	1.523E-5	1.362E-4	11	193	DSCAM,PKP4,GRIA2,PTEN,SKI,CRHR1,STXBP1,NRXN1,SCN2A,MBD5,RAI1
Disease	C1839333	EPILEPTIC ENCEPHALOPATHY, EARLY INFANTILE, 2	DisGeNET BeFree	1.902E-7	8.183E-4	1.544E-5	1.381E-4	7	57	GABRB3,HDAC4,CHD2,STXBP1,SCN1A,SCN2A,KCNQ3
Disease	C2986703	Overgrowth Syndrome	DisGeNET BeFree	2.261E-7	9.728E-4	1.801E-5	1.611E-4	6	36	TCF20,NSD1,CHD8,PTEN,KMT5B,DNMT3A
Disease	C0233794	Memory impairment	DisGeNET BeFree	2.746E-7	1.181E-3	2.148E-5	1.921E-4	19	648	DPYSL2,DEAF1,HDAC4,MAPT,DYRK1A,GRIA2,SRPK2,CHD2,GRIN2B,PTEN,CREBBP,GFAP,CRHR1,SHANK2,PPP5C,SCN2A,NR3C2,CTNNB1,DNMT3A
Disease	C0238111	Lennox-Gastaut syndrome	DisGeNET BeFree	3.642E-7	1.567E-3	2.798E-5	2.503E-4	5	21	GABRB2,GABRB3,CHD2,SLC6A1,SCN1A
Disease	C0025958	Microcephaly	DisGeNET BeFree	3.964E-7	1.705E-3	2.956E-5	2.644E-4	14	358	TLK2,DEAF1,FOXP2,DYRK1A,NSD1,CHD8,BCL11A,PTEN,CREBBP,NRXN1,ASXL3,SCN2A,CTNNB1,MBD5
Disease	C0014556	Epilepsy, Temporal Lobe	DisGeNET BeFree	3.985E-7	1.714E-3	2.956E-5	2.644E-4	13	305	GABRB3,SPAST,DSCAM,MAPT,GRIA2,GRIN2B,GFAP,SHANK3,SOX7,SCN1A,SCN2A,KCNQ3,DNMT3A
Disease	C0018798	Congenital Heart Defects	DisGeNET BeFree	6.622E-7	2.849E-3	4.828E-5	4.319E-4	13	319	DSCAM,MED13L,TEK,CREBBP,GFAP,SOX7,KANSL1,SETD5,NTM,SCN1A,ANKRD11,FOXP1,RAI1
Disease	C0393702	Myoclonic Astatic Epilepsy	DisGeNET Curated	8.759E-7	3.768E-3	6.280E-5	5.617E-4	4	11	CHD2,SLC6A1,STXBP1,SCN1A
Disease	C0009241	Cognition Disorders	DisGeNET BeFree	1.355E-6	5.827E-3	9.553E-5	8.545E-4	17	584	TCF4,FOXP2,MAPT,DYRK1A,GRIA2,GRIN2B,MED13L,PTEN,ADNP,CREBBP,GFAP,SYNGAP1,NRXN1,SCN1A,SCN2A,NCOA1,FOXP1
Disease	C0027765	nervous system disorder	DisGeNET BeFree	1.390E-6	5.980E-3	9.566E-5	8.556E-4	22	942	DPYSL2,CELF4,SPAST,MANBA,HDAC4,FOXP2,MAPT,DYRK1A,GRIA2,CHD2,GRIN2B,PTEN,CREBBP,GFAP,SHANK3,SYNGAP1,SLC6A1,WNT5B,SHANK2,SCN1A,SCN2A,CTNNB1
Disease	C0751265	Learning Disabilities	DisGeNET BeFree	1.401E-6	6.026E-3	9.566E-5	8.556E-4	7	76	FOXP2,MAPT,PTEN,TBL1XR1,TRIP12,AP2S1,DYNC1H1
Disease	C1853490	22q13.3 Deletion Syndrome	DisGeNET BeFree	2.612E-6	1.124E-2	1.756E-4	1.570E-3	4	14	SHANK3,SHANK2,KANSL1,MBD5
Disease	C0751495	Seizures, Focal	DisGeNET BeFree	3.958E-6	1.703E-2	2.620E-4	2.343E-3	5	33	PTEN,STXBP1,SCN1A,SCN2A,KCNQ3
Disease	C0751122	Infantile Severe Myoclonic Epilepsy	DisGeNET BeFree	4.116E-6	1.771E-2	2.643E-4	2.364E-3	6	58	GABRB3,CHD2,STXBP1,SCN1A,SCN2A,KCNQ3
Disease	C0014550	Myoclonic Epilepsy	DisGeNET BeFree	4.116E-6	1.771E-2	2.643E-4	2.364E-3	6	58	CHD2,RFX3,SYNGAP1,STXBP1,SCN1A,SCN2A
Disease	C0159020	Convulsions in the newborn	DisGeNET BeFree	4.695E-6	2.020E-2	2.936E-4	2.626E-3	4	16	STXBP1,SCN1A,SCN2A,KCNQ3
Disease	C0006111	Brain Diseases	DisGeNET BeFree	4.708E-6	2.025E-2	2.936E-4	2.626E-3	12	323	DPYSL2,DSCAM,FOXP2,MAPT,GRIN2B,LRRC4C,PTEN,GFAP,SHANK3,SYNGAP1,NRXN1,SCN2A
Disease	C0005586	Bipolar Disorder	DisGeNET BeFree	4.964E-6	2.136E-2	3.051E-4	2.729E-3	20	863	GABRB2,GABRB3,TCF4,DPYSL2,TCF7L2,DSCAM,PKP4,GRIA2,POU3F2,GRIN2B,LRRC4C,GFAP,SHANK3,CRHR1,NRXN1,KCNQ3,RORB,NR3C2,CTNNB1,MBD5
Disease	C0238111	Lennox-Gastaut syndrome	DisGeNET Curated	7.578E-6	3.260E-2	4.528E-4	4.050E-3	3	6	GABRB3,CHD2,SCN1A
Disease	C4085238	MYOCLONIC-ATONIC EPILEPSY	DisGeNET BeFree	7.578E-6	3.260E-2	4.528E-4	4.050E-3	3	6	CHD2,SLC6A1,SCN1A
Disease	C1954751	Microdeletion syndromes	DisGeNET BeFree	7.804E-6	3.357E-2	4.599E-4	4.113E-3	4	18	SETD5,ANKRD11,FOXP1,MBD5
Disease	C0026351	Moderate intellectual disability	DisGeNET BeFree	8.128E-6	3.497E-2	4.725E-4	4.227E-3	5	38	TCF20,MAPT,MED13L,SHANK3,ANKRD11
