# Supplementary material for: Drug repurposing candidates to treat core symptoms in autism spectrum disorder
Source: Front Pharmacol. 2022 Sep 12;13:995439. doi: 10.3389/fphar.2022.995439 (PMC9510394; doi:10.3389/fphar.2022.995439)
Supplement: Supplementary file 6 [file Table5.xlsx]

## Sheet: Drugs (N=177)
drug	correlation_coefficient	p_value	genes_in_ASD_network	drug information according to DrugBank
loperamide	-0.341044	0.0189794	TEK	a long acting antidiarrheal used to control nonspecific diarrhea and chronic diarrhea caused by inflammatory bowel disease, or gastroenteritis
bromocriptine	-0.332133	0.0225575	DRD2	dopamine D2 receptor agonist used for the treatment of galactorrhea due to hyperprolactinemia and other prolactin-related conditions, as well as in early Parkinsonian Syndrome
drospirenone	-0.326634	0.0250359	NR3C2	a progestin used in oral contraceptive pills for the prevention of pregnancy and other conditions such as to control acne and premenstrual dysphoric disorder (PMDD)
progesterone	-0.298548	0.0415122	NR3C2, PTEN, GFAP	a hormone used for a variety of functions, including contraception, control of abnormal uterine bleeding, maintenance of pregnancy, and prevention of endometrial hyperplasia
lamotrigine	-0.278719	0.0578104	SCN1A, SCN2A	a phenyltriazine antiepileptic used to treat some types of epilepsy and bipolar I disorder
raloxifene	-0.26757	0.0690207	MAPT	a selective estrogen receptor modulator that is used to prevent and treat osteoporosis and reduce the risk of invasive breast cancer in high-risk postmenopausal women
dalfampridine	-0.266591	0.0700827	KCNQ3, KCNQ2, KCNQ5, KCNQ4	a potassium channel blocker used for the improvement of motor function in patients with multiple sclerosis (MS)
vemurafenib	-0.265863	0.0708794	PTEN	a kinase inhibitor used to treat patients with Erdheim-Chester Disease who have the BRAF V600 mutation, and melanoma in patients who have the BRAF V600E mutation
pramipexole	-0.259369	0.0783177	DRD2	a non-ergot dopamine agonist used to treat the signs and symptoms of idiopathic Parkinson's disease and Restless Legs Syndrome (RLS)
methyldopa	-0.257471	0.0806043	DRD2	a centrally-acting alpha-2 adrenergic agonist used to manage hypertension alone or in combination with hydrochlorothiazide, and to treat hypertensive crises
topiramate	-0.252686	0.0866004	GABRB3, SCN1A, GRIA2, GABRB2, GRIA3, GABRA6, SCN2A	an anticonvulsant drug used in the control of epilepsy and in the prophylaxis and treatment of migraines
fluspirilene	-0.250748	0.0891247	DRD2	an antipsychotic agent used in the treatment of schizophrenia
tetracaine	-0.249528	0.0907441	SCN1A, SCN2A	a local anaesthetic agent used to induce local analgesia in the eyes and skin during medical procedures
piribedil	-0.247564	0.0933973	DRD2	a dopamine agonist used with or without levodopa in the treatment of Parkinson's disease
metoclopramide	-0.236207	0.109941	DRD2	an antiemetic agent and dopamine D2 antagonist used in the treatment of gastroesophageal reflux disease, prevention of nausea and vomiting, and to stimulate gastric emptying
palbociclib	-0.235202	0.111506	DYRK1A, TAOK1, PTEN	an endocrine-based chemotherapeutic agent used in combination with other antineoplastic agents to treat HER2-negative and HR-positive advanced or metastatic breast cancer
gabapentin	-0.226004	0.12663	CACNA1H, CACNA2D3, KCNQ5, KCNQ3, CACNA1E	an anticonvulsant medication used in the management of peripheral neuropathic pains, postherpetic neuralgia, and partial-onset seizures
sulfasalazine	-0.225417	0.127645	MAPT	an anti-inflammatory drug used to treat Crohn's disease and rheumatoid arthritis
vorinostat	-0.224871	0.128595	PTEN, BAP1, HDAC4	a histone deacetylase (HDAC) inhibitor used for the treatment of cutaneous manifestations in patients with progressive, persistent, or recurrent cutaneous T- cell lymphoma (CTCL) following prior systemic therapies
capecitabine	-0.222852	0.132153	PTEN	a nucleoside metabolic inhibitor indicated to treat colon, colorectal and breast cancer
lorazepam	-0.218012	0.140982	GABRA6, GABRB3, GABRB2	a short-acting benzodiazepine commonly used to treat panic disorders, severe anxiety, and seizures
irinotecan	-0.215511	0.145713	XRCC3, KCNQ5, KLC1	an antineoplastic enzyme inhibitor used to treat metastatic carcinoma of the colon or rectum
dopamine	-0.211813	0.152922	DRD2	a catecholamine neurotransmitter used to treat hemodynamic imbalances, poor perfusion of vital organs, low cardiac output, and hypotension
repaglinide	-0.21007	0.156408	TCF7L2	a antihyperglycemic used to improve glycemic control in diabetes
letrozole	-0.209325	0.157916	KMT2C	an aromatase inhibitor used to treat breast cancer in postmenopausal women
buspirone	-0.195668	0.187472	DRD2	an anxiolytic agent used for short-term treatment of generalized anxiety and second-line treatment of depression
allopurinol	-0.195493	0.187874	MYT1L, NTNG1, TBL1XR1	a xanthine oxidase inhibitor used to reduce urinary and serum uric acid concentrations in patients with gout, recurrent calcium oxalate calculi, and various malignancies
tamoxifen	-0.190464	0.199712	GGT1, NCOA1	a selective estrogen receptor modulator used to treat estrogen receptor positive breast cancer, reduce the risk of invasive breast cancer following surgery, or reduce the risk of breast cancer in high risk women
niclosamide	-0.190199	0.200351	FZD1, MAPT	an anthelmintic indicated in the treatment of beef, pork, fish, and dwarf tapeworm infections in adults and children
propranolol	-0.190041	0.200732	GFAP	a non-selective beta adrenergic antagonist used to treat hypertension, angina, atrial fibrillation, myocardial infarction, migraine, essential tremor, hypertrophic subaortic stenosis, and pheochromocytoma
duloxetine	-0.188864	0.203588	KMT2E, NRXN1	a serotonin norepinephrine reuptake inhibitor used to treat generalized anxiety disorder, neuropathic pain, osteoarthritis, and stress incontinence
trifluoperazine	-0.182854	0.218612	DRD2	a phenothiazine used to treat depression, anxiety, and agitation
diazepam	-0.175938	0.236831	CCKBR, GABRB3, GABRB2, GABRA6	a long-acting benzodiazepine with rapid onset commonly used to treat panic disorders, severe anxiety, alcohol withdrawal, and seizures
trametinib	-0.174479	0.240803	CTNNB1	a kinase inhibitor used to treat patients with specific types of melanoma, non-small cell lung cancer, and thyroid cancer
menadione	-0.172577	0.24605	MAPT	a synthetic naphthoquinone that can be converted to active vitamin K2
diclofenac	-0.172281	0.246872	GGT1	an NSAID used to treat the signs and symptoms of osteoarthritis and rheumatoid arthritis
binimetinib	-0.169354	0.255115	PTEN	a medication used to treat metastatic melanoma with specific mutations
alpelisib	-0.166445	0.263489	PTEN	a phosphatidylinositol 3-kinase (PI3K) inhibitor that is indicated in combination with fulvestrant to treat postmenopausal women, and men, with advanced or metastatic breast cancer
gefitinib	-0.165968	0.264877	MAPT, PTEN, BLK	a tyrosine kinase inhibitor used as first-line therapy to treat non-small cell lung carcinoma (NSCLC) that meets certain genetic mutation criteria
fluphenazine	-0.164163	0.270183	DRD2	a phenothiazine used to treat patients requiring long-term neuroleptic therapy
methimazole	-0.159146	0.285296	GFAP, DPYSL3	a thionamide antithyroid agent that inhibits the actions of thyroid peroxidase, leading to a reduction in thyroid hormone synthesis and amelioration of hyperthyroidism
asenapine	-0.158856	0.286186	DRD2	an atypical antipsychotic used to treat patients with bipolar I disorder and patients with schizophrenia
amoxapine	-0.158613	0.286934	DRD2	a tricyclic antidepressant used in the treatment of neurotic or reactive depressive disorders and endogenous or psychotic depression
felbamate	-0.152985	0.304594	GRIN2B	an anticonvulsant used to treat severe epilepsy
belinostat	-0.152763	0.305306	HDAC4	a histone deacetylase (HDAC) inhibitor used for the treatment of patients with relapsed or refractory peripheral T-cell lymphoma (PTCL)
venetoclax	-0.151391	0.309722	PTEN	a BCL-2 inhibitor used to treat chronic lymphocytic leukemia, small lymphocytic lymphoma, or acute myeloid leukemia
acetazolamide	-0.150094	0.313933	MMP12	a carbonic anhydrase inhibitor used to treat edema from heart failure or medications, certain types of epilepsy, and glaucoma
temozolomide	-0.148426	0.319404	PTEN, HDAC4	an alkylating agent used to treat glioblastoma multiforme and refractory anaplastic astrocytoma
papaverine	-0.147944	0.320993	CREBBP	an alkaloid used to treat many types of smooth muscle spasms such as "vascular spasms" associated with acute myocardial infarction and angina pectoris, as well as "visceral spasms"
dacomitinib	-0.147106	0.323773	PTEN	a medication used to treat non small cell lung cancer with EGFR exon 19 deletion of exon 21 L858R substitution
triclabendazole	-0.146539	0.325664	MAPT	an anthelmintic drug used to treat fascioliasis
anastrozole	-0.144706	0.331816	KMT2C	a competitive, selective, non-steroidal aromatase inhibitor used as adjuvant therapy for the treatment of hormone receptor-positive breast cancer in postmenopausal women
phentolamine	-0.143879	0.334617	DRD2	an alpha adrenergic antagonist used to reverse soft tissue anesthesia
mestranol	-0.140923	0.344747	GGT1	a synthetic estradiol found in oral contraceptive pills for contraception and the treatment of other conditions in the female reproductive system, such as dysmenorrhea and dysfunctional uterine bleeding
sunitinib	-0.138216	0.354185	BAP1	a receptor tyrosine kinase inhibitor and chemotherapeutic agent used for the treatment of renal cell carcinoma (RCC) and imatinib-resistant gastrointestinal stromal tumor (GIST)
etomidate	-0.136793	0.359209	GABRB3, GABRB2, GABRA6	a short-acting intravenous anesthetic indicated for the induction of anesthesia and supplementation of subpotent anesthesia during short operative procedures
hexachlorophene	-0.134806	0.366299	MAPT	a chlorinated bisphenol antiseptic used as a surgical scrub and skin cleanser
thalidomide	-0.131894	0.376836	CTNNB1	a medication used to treat cancers, particularly newly diagnosed multiple myeloma, and erythema nodosum leprosum
valproic acid	-0.128057	0.390993	HDAC4	an anticonvulsant used to control complex partial seizures and both simple and complex absence seizures
pioglitazone	-0.127429	0.393342	GFAP	a thiazolidinedione used adjunctively with diet and exercise to normalize glycemic levels in adults with type 2 diabetes mellitus
rabeprazole	-0.126016	0.398651	MAPT	a proton pump inhibitor used to help gastrointestinal ulcers heal, to treat symptoms of gastroesophageal reflux disease (GERD), to eradicate Helicobacter pylori, and to treat hypersecretory conditions such as Zollinger-Ellison Syndrome
regorafenib	-0.122122	0.413501	TEK	a kinase inhibitor used to treat patients with metastatic colorectal cancer, unresectable, locally advanced, or metastatic gastrointestinal stromal tumors, and hepatocellular carcinoma
citalopram	-0.121833	0.414613	GRIA3	a selective serotonin reuptake inhibitor (SSRI) used in the treatment of depression
ibrutinib	-0.118883	0.426088	BLK	an antineoplastic agent used to treat chronic lymphocytic leukemia, mantle cell lymphoma, and Waldenstrom's Macroglobulinemia
cariprazine	-0.117542	0.431365	DRD2	an atypical antipsychotic used to treat schizophrenia and acute manic or mixed episodes due to bipolar I disorder
chlorprothixene	-0.110577	0.459336	DRD2	a thioxanthene antipsychotic
dexamethasone	-0.110569	0.459371	NR3C2, UBR1, CTNNB1, GGT1	a glucocorticoid available in various modes of administration that is used for the treatment of various inflammatory conditions, including bronchial asthma, as well as endocrine and rheumatic disorders
tiagabine	-0.109052	0.465591	SLC6A1	an antiepileptic used to treat partial seizures
tacrolimus	-0.108257	0.468869	TCF7L2	a calcineurin inhibitor used to prevent organ transplant rejection and to treat moderate to severe atopic dermatitis
felodipine	-0.107518	0.471927	MAPT, NR3C2	a calcium channel blocker used to treat hypertension
nimodipine	-0.101446	0.497453	NR3C2, GFAP	a calcium channel blocker used to improve neurological outcomes in patients with subarachnoid hemorrhage due to a ruptured intracranial aneurysm
piracetam	-0.101248	0.498296	GRIA2, GRIA3	a nootropic cyclic GABA derivative used in myoclonus, sickle cell disease, alcohol dependence, and as a general cognitive enhancer
aripiprazole	-0.101026	0.499244	DRD2	an atypical antipsychotic used in the treatment of a wide variety of mood and psychotic disorders, such as schizophrenia, bipolar I, major depressive disorder, irritability associated with autism, and Tourette's syndrome
pasireotide	-0.100735	0.500486	SSTR2	a somatostatin analog used in the treatment of Cushing’s disease, specifically for those patients whom pituitary surgery is not appropriate
rasagiline	-0.0999017	0.504055	DRD2	an irreversible inhibitor of monoamine oxidase used for the symptomatic management of idiopathic Parkinson's disease as initial monotherapy and as adjunct therapy to levodopa
melatonin	-0.0948343	0.526031	GFAP	an endogenous hormone produced by the pineal gland that regulates sleep-wake cycles and when provided exogenously has beneficial effects on sleep-onset latency
talazoparib	-0.0925744	0.535983	PTEN	a poly-ADP ribose polymerase inhibitor used to treat HER2-, BRCA mutated locally advanced or metastatic breast cancer
chlorpromazine	-0.0911493	0.542305	DRD2	a phenothiazine antipsychotic used to treat nausea, vomiting, preoperative anxiety, schizophrenia, bipolar disorder, and severe behavioral problems in children
triflupromazine	-0.089667	0.548918	DRD2	a phenothiazine used as an antipsychotic agent and as an antiemetic
dasatinib	-0.0890767	0.551563	BLK, TAOK1	a tyrosine kinase inhibitor used for the treatment of lymphoblastic or chronic myeloid leukemia with resistance or intolerance to prior therapy
dequalinium	-0.0889233	0.552251	KCNN2	a quaternary ammonium cation antimicrobial agent used to treat common infections of the mouth and throat that has been studied in the treatment of vaginal candidiasis
pantoprazole	-0.0888143	0.55274	MAPT	a proton pump inhibitor used to treat erosive esophagitis, gastric acid hypersecretion, and to promote healing of tissue damage caused by gastric acid
itraconazole	-0.0824763	0.581535	MAPT	an antifungal agent used for the treatment of various fungal infections in immunocompromised and non-immunocompromised patients, such as pulmonary and extrapulmonary blastomycosis, histoplasmosis, and onychomycosis
nintedanib	-0.0788265	0.598419	BLK	a triple angiokinase inhibitor indicated for the treatment of idiopathic pulmonary fibrosis, systemic sclerosis-associated interstitial lung disease, and in combination with docetaxel for non-small cell lung cancer
caffeine	-0.0757872	0.612639	GFAP	a stimulant present in tea, coffee, cola beverages, analgesic drugs, and agents used to increase alertness. It is also used in to prevent and treat pulmonary complications of premature birth
pentoxifylline	-0.0731758	0.624972	GFAP	a methylxanthine derivative used to treat intermittent claudication caused by chronic occlusive arterial disease of the limbs
venlafaxine	-0.0724777	0.628287	GABRA6, GRIA3	a selective serotonin and norepinephrine reuptake inhibitor (SNRI) used for the treatment of major depression
sirolimus	-0.0676424	0.651439	TCF7L2	an mTOR inhibitor immunosuppressant used to prevent organ transplant rejections, treat lymphangioleiomyomatosis, and treat adults with perivascular epithelioid cell tumors
thiothixene	-0.0633454	0.672291	DRD2	an antipsychotic indicated for the management of schizophrenia
rufinamide	-0.0607062	0.685221	SCN2A, SCN1A	an antiepileptic drug used as adjunctive therapy to treat seizures associated with Lennox-Gastaut Syndrome (LGS)
lidocaine	-0.0572633	0.702224	SCN2A, SCN1A	a local anesthetic used in a wide variety of superficial and invasive procedures
atorvastatin	-0.0518855	0.729069	TFPI	an HMG-CoA reductase inhibitor used to lower lipid levels and reduce the risk of cardiovascular disease including myocardial infarction and stroke
romidepsin	-0.0483538	0.746877	HDAC4	a histone deacetylase (HDAC) inhibitor used to treat cutaneous T-cell lymphoma
imatinib	-0.0473643	0.751891	TAOK1, CTNNB1	a tyrosine kinase inhibitor used to treat a number of leukemias, myelodysplastic/myeloproliferative disease, systemic mastocytosis, hypereosinophilic syndrome, dermatofibrosarcoma protuberans, and gastrointestinal stromal tumors
vilazodone	-0.0421549	0.778448	DRD2	an antidepressant agent used for the treatment of major depressive disorder that targets the 5-HT transporter and 5-HT1A receptors
mephentermine	-0.0404207	0.787346	DRD2	a sympathomimetic agent used in the treatment of hypotension
capsaicin	-0.0387532	0.795927	GFAP	a topical analgesic agent used for the symptomatic relief of neuropathic pain associated with post-herpetic neuralgia, as well as other muscle and joint pain
enzalutamide	-0.0365852	0.80712	PTEN	an androgen receptor inhibitor used to treat castration-resistant prostate cancer and metastatic castration-sensitive prostate cancer
phensuximide	-0.0362549	0.808828	CACNA1H	a member of the succinimide class with anticonvulsant properties used for the treatment of epilepsy
warfarin	-0.0340886	0.820056	DNMT3A	a vitamin K antagonist used to treat venous thromboembolism, pulmonary embolism, thromboembolism with atrial fibrillation, thromboembolism with cardiac valve replacement, and thromboembolic events post myocardial infarction
sorafenib	-0.0329998	0.825713	BLK, PTEN, TAOK1	a kinase inhibitor used in the treatment of unresectable liver carcinoma and advanced renal carcinoma
naphazoline	-0.0317916	0.832	DRD2	a sympathomimetic vasoconstrictor used for the symptomatic relief of redness and itching of the eye, and nasal congestion
everolimus	-0.0313475	0.834314	PTEN, BAP1	a mammalian target of rapamycin (mTOR) kinase inhibitor used to treat various types of malignancies
fluorouracil	-0.0307239	0.837565	XRCC3, WNT5B, PPP2R5D, KLC1, PTEN, MUC2	a pyrimidine analog used to treat basal cell carcinomas, and as an injection in palliative cancer treatment
spironolactone	-0.0286888	0.848194	NR3C2	an aldosterone receptor antagonist used for the treatment of hypertension, hyperaldosteronism, edema due to various conditions, hirsutism (off-label) and hypokalemia
zileuton	-0.0281989	0.850757	MMP12	a leukotriene synthesis inhibitor used in the prophylaxis and treatment of chronic asthma
pazopanib	-0.0250106	0.86747	TAOK1	an antineoplastic agent used in the treatment of advanced renal cell cancer and advanced soft tissue sarcoma in patients with prior chemotherapy
idelalisib	-0.0210612	0.888252	PTEN	an antineoplastic kinase inhibitor used to treat chronic lymphocytic leukemia (CLL), relapsed follicular B-cell non-Hodgkin lymphoma (FL), and relapsed small lymphocytic lymphoma (SLL)
hydrocortisone	-0.0168341	0.910578	NR3C2	a glucocorticoid used to treat corticosteroid-responsive dermatoses, endocrine disorders, immune conditions, and allergic disorders
piroxicam	-0.0143624	0.923666	GGT1	an NSAID used to treat the symptoms of osteoarthritis and rheumatoid arthritis
gemcitabine	-0.00854535	0.954539	PTEN	a nucleoside metabolic inhibitor used as adjunct therapy in the treatment of certain types of ovarian cancer, non-small cell lung carcinoma, metastatic breast cancer, and as a single agent for pancreatic cancer
zonisamide	-0.00673609	0.964157	SCN4B, SCN2A, CACNA1H, SCN1A	a sulfonamide anticonvulsant used to treat partial seizures
phenylephrine	-0.00623263	0.966835	DRD2	an alpha-1 adrenergic agonist used in the management of hypotension, generally in the surgical setting associated with the use of anesthetics
aspirin	-0.00180093	0.990414	GFAP, SLC30A9	a salicylate used to treat pain, fever, inflammation, migraines, and reducing the risk of major adverse cardiovascular events
bupropion	0.00558983	0.970254	DRD2	a norepinephrine and dopamine reuptake inhibitor used in the treatment of major depressive disorder (MDD), seasonal affective disorder (SAD), and as an aid to smoking cessation
aminoglutethimide	0.0124066	0.934036	GGT1	an adrenocortical steroid synthesis inhibitor used in the treatment of Cushing's syndrome
colchicine	0.0125122	0.933476	CREBBP, GFAP	an alkaloid used in the symptomatic relief of pain in attacks of gout and to treat the inflammatory symptoms of Familial Mediterranean Fever (FMF)
exemestane	0.017383	0.907675	KMT2C	an aromatase inhibitor used to treat breast cancer in postmenopausal women after treatment with tamoxifen
sulpiride	0.0174823	0.90715	DRD2	a selective D2 dopamine receptor antagonist indicated to treat chronic and acute schizophrenia
epirubicin	0.0195788	0.896073	PPP2R5D	an anthracycline topoisomerase II inhibitor used as an adjuvant to treating axillary node metastases in patients who have undergone surgical resection of primary breast cancer
decitabine	0.0214443	0.886233	DNMT3A, MUC2	a chemotherapeutic pyrimidine nucleoside analogue used for the treatment of myelodysplastic syndromes (MDS) by inducing DNA hypomethylation and corresponding alterations in gene expression
temazepam	0.0236942	0.874388	GABRA6, GABRB2, GABRB3	a short-acting benzodiazepine commonly used to treat panic disorders, severe anxiety, and insomnia
droperidol	0.0292385	0.84532	DRD2	a butyrophenone derivative and dopamine antagonist used to prevent and treat postoperative nausea and vomiting
rotigotine	0.0296023	0.84342	DRD2	non-selective dopamine agonist used for the treatment of Parkinson's Disease and Restless Leg Syndrome
bortezomib	0.0308564	0.836874	F12	a proteasome inhibitor used to treat multiple myeloma in patients who have not been successfully treated with at least two previous therapies
nicotine	0.0312625	0.834757	DRD2	a stimulatory alkaloid found in tobacco products that is often used for the relief of nicotine withdrawal symptoms and as an aid to smoking cessation
lenalidomide	0.0332588	0.824366	CTNNB1	a thalidomide derivative used to treat multiple myeloma and anemia in low to intermediate risk myelodysplastic syndrome
vandetanib	0.0356001	0.812219	TEK, PTEN	an antineoplastic kinase inhibitor used to treat symptomatic or progressive medullary thyroid cancer in patients with unresectable locally advanced or metastatic disease
olaparib	0.0362775	0.808712	PTEN, BAP1	a poly (ADP-ribose) polymerase (PARP) inhibitor used to treat ovarian cancer, breast cancer, pancreatic cancer, and prostate cancer
etoposide	0.0436658	0.770718	NCOA1	a podophyllotoxin derivative used to treat testicular and small cell lung tumors
verapamil	0.0440411	0.768802	KCNMB1	a non-dihydropyridine calcium channel blocker used in the treatment of angina, arrhythmia, and hypertension
clonazepam	0.0447896	0.764983	GABRB3, GABRB2, GABRA6	a long-acting benzodiazepine with intermediate onset commonly used to treat panic disorders, severe anxiety, and seizures
risperidone	0.0456501	0.7606	DRD2, GRIN2B	a second-generation antipsychotic medication used to treat a number of mental health disorders including schizophrenia, bipolar mania, psychosis, or as an adjunct in severe depression
molindone	0.0581581	0.697791	DRD2	an antipsychotic used to treat schizophrenia
olanzapine	0.0583448	0.696867	CCKBR, DRD2	an antipsychotic drug used in the management of schizophrenia, bipolar 1 disorder, and agitation associated with these disorders
levetiracetam	0.0584049	0.69657	SCN1A	an anticonvulsant agent used as an adjunct medication to manage partial onset, myoclonic, and generalized tonic-clonic seizures in patients with epilepsy
quetiapine	0.0609987	0.683784	DRD2, GRIN2B	a psychotropic agent used for the management of bipolar disorder, schizophrenia, and major depressive disorder
brexpiprazole	0.0738825	0.621624	DRD2	a serotonin–dopamine activity modulator used in the treatment of major depressive disorder as an adjunct and schizophrenia
erlotinib	0.0752251	0.615285	BLK, PTEN	an EGFR tyrosine kinase inhibitor used to treat certain small cell lung cancers or advanced metastatic pancreatic cancers
dantrolene	0.0836804	0.576013	MAPT	a direct-acting skeletal muscle relaxant used for the treatment of management of the fulminant hypermetabolism of skeletal muscle leading to malignant hyperthermia crisis
cabozantinib	0.0900928	0.547014	TEK	a tyrosine kinase inhibitor used to treat advanced renal cell carcinoma, hepatocellular carcinoma, and medullary thyroid cancer
ribavirin	0.092571	0.535998	ANGPT2	a guanosine nucleoside used to treat some forms of Hepatitis C
safinamide	0.0926616	0.535597	SCN2A, SCN1A	a MAO-B inhibitor used as an add-on treatment to levodopa/carbidopa for Parkinson's disease during "off" episodes
azacitidine	0.0944048	0.527915	DNMT3A, GGT1	a pyrimidine nucleoside analogue used to treat certain subtypes of myelodysplastic syndrome
tretinoin	0.0966175	0.518244	RORB	a vitamin A derivative used to treat acne vulgaris, certain types of promyelocytic leukemia, and fine wrinkles
azithromycin	0.0992738	0.506752	TFPI	a macrolide antibiotic used to treat a variety of bacterial infections
dihydroergotamine	0.10107	0.499054	MAPT, DRD2	an ergot alkaloid used in the acute treatment of migraine headache and cluster headache
temsirolimus	0.10214	0.494497	CTNNB1, PTEN	a antineoplastic agent used in the treatment of renal cell carcinoma (RCC) that works by inhibiting mTOR
phenytoin	0.107293	0.472859	GGT1, SCN1A, SCN2A	an anticonvulsant drug used in the prophylaxis and control of various types of seizures
ziprasidone	0.113929	0.445755	DRD2	an atypical antipsychotic used to manage schizophrenia, bipolar mania, and agitation in patients with schizophrenia
pimozide	0.113961	0.445627	DRD2	an antipsychotic used to manage debilitating motor and phonic tics in patients with Tourette's Disorder
triamcinolone	0.117498	0.431538	CRHR1	a glucocorticoid used to treat a wide variety of inflammatory conditions of organ systems and tissues
primidone	0.127991	0.39124	GABRB2, GABRB3, SCN2A, GRIA2, SCN1A, GABRA6	an antiepileptic used to treat grand mal, psychomotor, and focal epileptic seizures
enalapril	0.132102	0.376077	NR3C2	a prodrug of an ACE inhibitor used to treat hypertension and congestive heart failure
amantadine	0.135209	0.364852	GRIN2B	a medication used to treat dyskinesia in Parkinson's patients receiving levodopa, as well as extrapyramidal side effects of medications
haloperidol	0.135346	0.364363	GRIN2B, DRD2	an antipsychotic agent used to treat schizophrenia and other psychoses, as well as symptoms of agitation, irritability, and delirium
fulvestrant	0.137415	0.357009	TFPI, PTEN	an estrogen receptor antagonist used to treat HR+ breast cancer that may also be HER2-
lurasidone	0.144423	0.332774	DRD2	an atypical antipsychotic used to treat schizophrenia and depressive episodes associated with bipolar I disorder
perampanel	0.156718	0.292804	GRIA3, GRIA2	a non-competitive AMPA glutamate receptor antagonist used to treat partial-onset seizures with or without secondarily generalized seizures, and as adjunctive treatment of primary generalized tonic-clonic seizures in patients with epilepsy
cabergoline	0.156849	0.292395	DRD2	a dopamine receptor agonist used for the treatment of hyperprolactinemic conditions due to various causes
carbamazepine	0.15901	0.285713	GGT1, SCN1A, SCN2A	an anticonvulsant used to treat various types of seizures and pain resulting from trigeminal neuralgia
paclitaxel	0.166663	0.262855	PTEN, DSCAM	a taxoid chemotherapeutic agent used as first-line and subsequent therapy for the treatment of advanced carcinoma of the ovary, and other various cancers including breast and lung cancer
eplerenone	0.167151	0.261439	NR3C2	an aldosterone receptor antagonist used to improve survival of patients with symptomatic heart failure and to reduce blood pressure
clozapine	0.170798	0.251027	DRD2, GRIN2B, CCKBR	an antipsychotic drug used in treatment resistant schizophrenia and to decrease suicide risk in schizophrenic patients
ropinirole	0.176627	0.234971	DRD2	a non-ergoline dopamine agonist used to treat the symptoms of Parkinson's disease and Restless Legs Syndrome
rucaparib	0.184221	0.215127	DYRK1A, PTEN	an anti-cancer agent used to treat recurrent ovarian, fallopian tube, or peritoneal cancer
daunorubicin	0.188912	0.20347	HDAC4, MAPT	an anthracycline aminoglycoside used to induce remission of nonlymphocytic leukemia and acute lymphocytic leukemia
prochlorperazine	0.201123	0.175227	DRD2	a phenothiazine derivative used in the treatment of schizophrenia and anxiety and to relieve severe nausea and vomiting
oxatomide	0.202759	0.171668	CACNA1H	an antihistamine indicated in the treatment and prevention of allergic symptoms
omeprazole	0.203147	0.170833	MAPT	a proton pump inhibitor used to treat GERD associated conditions such as heartburn and gastric acid hypersecretion, and to promote healing of tissue damage and ulcers caused by gastric acid and H. pylori infection
disulfiram	0.206421	0.163895	GGT1, GFAP, DRD2	a carbamate derivative used to treat alcohol addiction
flumazenil	0.220561	0.13628	GABRB3, GABRA6, GABRB2	a benzodiazepine antagonist that is used for the complete or partial reversal of the sedative effects caused by benzodiazepines in various clinical settings, such as induced general anesthesia for diagnostic and therapeutic procedures
riluzole	0.227539	0.124005	SCN2A, SCN1A	a glutamate antagonist used to treat amyotrophic lateral sclerosis
sumatriptan	0.272275	0.0640963	DRD2	a serotonin receptor agonist used to treat migraines and cluster headaches
metformin	0.287336	0.0501889	PTEN	a biguanide antihyperglycemic used in conjunction with diet and exercise for glycemic control in type 2 diabetes mellitus. It is also used off-label for insulin resistance in polycystic ovary syndrome (PCOS)
fluoxetine	0.299531	0.0408143	CRHR1	a selective serotonin reuptake inhibitor used to treat major depressive disorder, bulimia, OCD, premenstrual dysphoric disorder, panic disorder, and bipolar I
epinephrine	0.365239	0.0115894	MAPT	a hormone and neurotransmitter used to treat allergic reactions, to restore cardiac rhythm, and to control mucosal congestion, glaucoma, and asthma
